# Decoding the complexity of delayed wound healing following *Enterococcus faecalis* infection

Cenk CELIK<sup>1,5</sup>, Stella Yue Ting LEE<sup>1</sup>, Frederick Reinhart TANOTO<sup>2</sup>, Mark VELEBA<sup>2</sup>, Kimberly A. KLINE<sup>1,2,3</sup>, Guillaume THIBAUT<sup>1,4</sup>

<sup>1</sup>School of Biological Sciences and <sup>2</sup>Singapore Centre for Environmental Life Science Engineering, Nanyang Technological University, Singapore

<sup>3</sup>Department of Microbiology and Molecular Medicine, Faculty of Medicine, University of Geneva, Switzerland

<sup>4</sup>Mechanobiology Institute, National University of Singapore, Singapore

<sup>5</sup>Present address: Department of Genetics, Evolution and Environment, Genetics Institute, University College London, London, UK

Correspondence to:

Kimberly Kline, Tel: +41 (0)22 379 56 02; email: [Kimberly.Kline@unige.ch](mailto:Kimberly.Kline@unige.ch)

Guillaume Thibault, Tel: +65 6592 1787; email: [thibault@ntu.edu.sg](mailto:thibault@ntu.edu.sg)

Running title: Infected wound single-cell atlas

1 **ABSTRACT**

2 Wound infections are highly prevalent, and can lead to delayed or failed healing, causing significant  
3 morbidity and adverse economic impacts. These infections occur in various contexts, including diabetic  
4 foot ulcers, burns, and surgical sites. *Enterococcus faecalis* is often found in persistent non-healing  
5 wounds, but its contribution to chronic wounds remains understudied. To address this, we employed  
6 single-cell RNA sequencing (scRNA-seq) on infected wounds in comparison to uninfected wounds in a  
7 mouse model. Examining over 23,000 cells, we created a comprehensive single-cell atlas that captures  
8 the cellular and transcriptomic landscape of these wounds. Our analysis revealed unique transcriptional  
9 and metabolic alterations in infected wounds, elucidating the distinct molecular changes associated  
10 with bacterial infection compared to the normal wound healing process. We identified dysregulated  
11 keratinocyte and fibroblast transcriptomes in response to infection, jointly contributing to an anti-  
12 inflammatory environment. Notably, *E. faecalis* infection prompted a premature, incomplete epithelial-  
13 to-mesenchymal transition in keratinocytes. Additionally, *E. faecalis* infection modulated M2-like  
14 macrophage polarization by inhibiting pro-inflammatory resolution *in vitro*, *in vivo*, and in our scRNA-  
15 seq atlas. Furthermore, we discovered macrophage crosstalk with neutrophils, which regulates  
16 chemokine signaling pathways, while promoting anti-inflammatory interactions with endothelial cells.  
17 Overall, our findings offer new insights into the immunosuppressive role of *E. faecalis* in wound  
18 infections.

## 19 INTRODUCTION

20 Infections pose a challenge to the wound healing process, affecting both the skin's protective barrier  
21 and the efficient repair mechanisms required for tissue integrity. The skin, the largest and most intricate  
22 defense system in mammals, exhibits unique cellular heterogeneity and complexity that maintain tissue  
23 homeostasis. Within the skin, undifferentiated resident cells are the main modulators of tissue  
24 maintenance, albeit terminal differentiation dynamics adapt to the regenerative requirements of the  
25 tissue. Several comprehensive studies conducted in mice and humans have highlighted the complexity  
26 of the skin (Cheng et al., 2018; Der et al., 2019; Joost et al., 2020; Joost et al., 2018; Joost et al., 2016;  
27 Philippeos et al., 2018; Theocharidis et al., 2022). However, these studies have primarily focused on  
28 cellular heterogeneity and the transcriptome of intact skin or uninfected wounds, offering limited insights  
29 into the dynamics of wound healing following infection.

30

31 Efficient healing during wound infections involves a sequence of events occurring in three distinct but  
32 interconnected stages: inflammation, proliferation, and remodeling (Eming et al., 2014; Masson-Meyers  
33 et al., 2020; Minutti et al., 2017; Rognoni & Watt, 2018). These events involve a series of inter- and  
34 intracellular molecular interactions mediated by soluble ligands and the innate immune system (Lindley  
35 et al., 2016; Wang et al., 2018). The inflammatory phase initiates migration of leukocytes into the wound  
36 site to help clear cell debris and establish tissue protection through local inflammation. Initially,  
37 neutrophils, responding to pro-inflammatory cytokines like IL-1 $\beta$ , TNF- $\alpha$ , and IFN- $\gamma$ , extravasate through  
38 the endothelium to the site of injury. Subsequently, the proliferative stage aims to reduce wound size  
39 through contraction and re-establishment of the epithelial barrier. This stage is facilitated by activated  
40 keratinocytes modulated by inflammatory responses, cytokines, and growth factors. In the final stage,  
41 tissue remodeling restores the mechanical properties of intact skin through ECM reorganization,  
42 degradation, and synthesis (Wang et al., 2018). Dysregulation of this intricate mechanism can lead to  
43 pathological outcomes characterized by persistent inflammation and excessive ECM production  
44 (Ashcroft et al., 2013).

45

46 *Enterococcus faecalis* (*E. faecalis*) is a commensal bacterium in the human gut, and also an  
47 opportunistic pathogen responsible for various infections, including surgical site infections and diabetic  
48 ulcers (Kao & Kline, 2019). Bacterial wound infections in general, including those associated with *E.*

49 *faecalis*, are biofilm-associated, resulting in an antibiotic-tolerant population that may lead to persistent  
50 infections (Ch'ng et al., 2019). Additionally, *E. faecalis* has mechanisms to evade and suppress immune  
51 clearance by, for example, suppressing the pro-inflammatory M1-like phenotype in macrophage and  
52 preventing neutrophil extracellular trap formation (Kao et al., 2023; Kao & Kline, 2019; Tien et al., 2017).  
53 *E. faecalis* can also persist (Bertuccini et al., 2002; Gentry-Weeks et al., 1999; Horsley et al., 2018;  
54 Horsley et al., 2013; Olmsted et al., 1994; Wells et al., 1990; Wells et al., 1988; Zou & Shankar, 2014,  
55 2016) and replicate (da Silva et al., 2022; Nunez et al., 2022) within epithelial cells and macrophages,  
56 further complicating treatment. The combination of biofilm formation and immune evasion makes  
57 Enterococcal wound infections a significant clinical challenge.

58  
59 In a murine full-thickness excisional wound model, our prior investigations revealed a bifurcated  
60 trajectory characterizing *E. faecalis* wound infections (Chong et al., 2017). Initially, bacterial colony-  
61 forming units (CFU) increase in number in the acute replication phase, with a concomitant pro-  
62 inflammatory response characterized by pro-inflammatory cytokine and chemokine production coupled  
63 with neutrophil infiltration. In the subsequent persistence stage, *E. faecalis* CFU undergo gradual  
64 reduction and stabilization at approximately  $10^5$  CFU within wounds by 2-3-day post-infection (dpi),  
65 coinciding with delayed wound healing. Within this framework, we have identified specific bacterial  
66 determinants that contribute to each phase of *E. faecalis* infection. For example, *de novo* purine  
67 biosynthesis emerges as a pivotal factor in enhancing bacterial fitness during the acute replication  
68 phase (Tan et al., 2022). In the persistent phase at 3 dpi, the galactose and mannose uptake systems,  
69 in conjunction with the *mprF* gene product, are associated with nutrient acquisition and resistance to  
70 antimicrobial peptides and neutrophil-mediated killing, respectively (Bao et al., 2012; Chong et al., 2017;  
71 Jin et al., 2021; Kandaswamy et al., 2013; Rashid et al., 2023). Nonetheless, the intricate interplay  
72 between these *E. faecalis* persistence-associated virulence factors, their immunomodulatory evasion  
73 strategies, and precise implications in the context of delayed wound healing remains to be investigated.

74  
75 To address this, we generated a comprehensive single-cell atlas of the host response to persistent *E.*  
76 *faecalis* wound infection. We observed that *E. faecalis* induces immunosuppression in keratinocytes  
77 and fibroblasts, delaying the immune response. Notably, *E. faecalis* infection prompted a partial  
78 epithelial-to-mesenchymal transition (EMT) in keratinocytes. Moreover, macrophages in infected



79 wounds displayed M2-like polarization. Our findings also indicate that the interactions between  
80 macrophages and endothelial cells contribute to the anti-inflammatory niche during infection.  
81 Furthermore, *E. faecalis*-infected macrophages drive pathogenic vascularization signatures in  
82 endothelial cells, resembling the tumor microenvironment in cancer. We also noted *E. faecalis* infected-  
83 associated macrophage crosstalk with neutrophils, regulating chemokine signaling pathways and  
84 promoting anti-inflammatory interactions with endothelial cells. These insights from our scRNA-seq  
85 atlas provide a foundation for future studies aimed at investigating bacterial factors contributing to  
86 wound pathogenesis and understanding the underlying mechanisms associated with delayed healing.

87

## 88 **RESULTS**

### 89 ***E. faecalis* infection inhibits wound healing signatures**

90 In the wound environment, various cell types, including myeloid cells, fibroblasts, and endothelial cells,  
91 play critical roles in the initial and later stages of wound healing by releasing platelet-derived growth  
92 factor (PDGF). Additionally, macrophages secrete epidermal growth factor (EGF) in injured skin, which  
93 operates through the epidermal growth factor receptor (EGFR) to promote keratinocyte proliferation,  
94 migration, and re-epithelialization. To understand the impact of *E. faecalis* infection on wound healing,  
95 we infected excisional dorsal wounds on C57BL/6J male mice and measured gene expression levels  
96 of wound healing markers in bulk tissue at 4 dpi at the onset of persistent infection. We then compared  
97 the expression profiles with those of (i) wounded but uninfected or (ii) unwounded and uninfected  
98 controls, ensuring that the uninfected and infected mice were of comparable weight (**Figures 1A, S1A,**  
99 **and S1B**). We observed lower expression of platelet-derived growth factor subunit A (*Pdgfa*) in *E.*  
100 *faecalis*-infected wounds than in unwounded skin, while uninfected wounds remained unchanged.  
101 Similarly, the expression of *Egf* was lower in uninfected wounds than in healthy skin, while reaching the  
102 lowest levels in *E. faecalis*-infected wounds. The reduced *Egf* expression in uninfected wounds at 4  
103 days post-wounding is expected, as EGF primarily influences skin cell growth, proliferation, and  
104 differentiation during the later stages of wound healing, typically around 10 days post-injury (Schultz et  
105 al., 1991). By contrast, wounding alone resulted in higher transforming growth factor beta 1 (*Tgfb1*)  
106 expression. TGF- $\beta$ 1 plays a dual role in wound healing depending on the microenvironment. During  
107 tissue maintenance, TGF- $\beta$ 1 acts as a growth inhibitor, and its absence in the epidermis leads to  
108 keratinocyte hyperproliferation (Guasch et al., 2007). Elevated TGF- $\beta$ 1 levels have also been observed

109 in the epidermis of chronic wounds in both humans and mouse models (Li et al., 2021; Xie et al., 2009).  
110 In addition, we observed a slightly higher expression of fibroblast growth factor 1 (*Fgf1*) in uninfected  
111 wounds, although the differences were comparable (**Figure S1A**). Overall, the persistent *E. faecalis*  
112 infection contributed to higher *Tgfb1* expression, whilst *Pdgfa* levels remained low, correlating with  
113 delayed wound healing.

114

### 115 **Single-cell transcriptomes of full-thickness skin wounds diverge during healing and infection**

116 To understand the cellular heterogeneity in the wound environment following *E. faecalis* infection, we  
117 dissociated cells from full-thickness wounds, including minimal adjacent healthy skin. We generated  
118 single-cell transcriptome libraries using the droplet-based 10X Genomics Chromium microfluidic  
119 partitioning system (**Figure 1B** and **Table S1**). By integrating the transcriptomes of approximately  
120 23,000 cells, we employed the unbiased graph-based Louvain algorithm to identify clusters (Zappia &  
121 Oshlack, 2018). Our analysis revealed 24 clusters, irrespective of infection (**Figure S1C**). These  
122 clusters included epithelial, immune, fibroblast, endothelial, vascular, and neural cell types (**Figures**  
123 **1C, 1D, S1D, S1E**, and **Tables S2-S4**). Within the epithelial class, we identified basal (BAS1-3) and  
124 suprabasal (SUP1-4) keratinocytes, hair follicles (HFSUP1-2), outer bulge (OB), and sebaceous gland  
125 (SG) cells (**Figure 1E**). The immune class included macrophages (MC1-2), neutrophils (NEUT1-2),  
126 memory T cells (TC), and a mixed population (DC/LC) of dendritic cells (DCs) and Langerhans cells  
127 (LC). Notably, cells from infected wounds (~13,000 cells) demonstrated distinct clustering patterns  
128 compared to cells from uninfected wounds (~9,500 cells) (**Figure S1F** and **Table S1**).

129

130 We proceeded to analyze upregulated gene signatures for each Louvain cluster (**Figure 1F** and **Table**  
131 **S2**) and compared them to the cell-type signature database (Franzen et al., 2019) (PanglaoDB) to  
132 identify characteristic gene expression patterns (**Figure 1G**). Additionally, we identified highly  
133 expressed genes in uninfected and infected wounds (**Tables S3** and **S4**) and performed co-expression  
134 network analysis (WGCNA) to uncover the core genes associated with cell types (**Figure 1H**).

135

136 We also delineated macrophage populations (**Figure S1G-I**), identifying an M2-like polarization (**Figure**  
137 **1F, MC1**) marked by higher expression of *Arg1*, *Egr2*, *Fn1*, and *Fpr2* (**Figure S1G**), and a tissue-  
138 resident macrophage (TRM) population (**Figure 1F, MC2**) expressing *Ccr5*, *Cd68*, *Fcgr1*, *Mrc1*

139 (*Cd206*), *Ms4a4c*, and *Pparg* (**Figure S1H**). Both macrophage populations exhibited limited expression  
140 of *Grp18* and *Nos2* (*iNos*), which are typically associated with M1-like polarization (**Figure S1I**).  
141 Together, our analysis outlined the differences observed in uninfected and infected wound healing  
142 across epithelial, fibroblast, and immune cell populations.

143

#### 144 ***E. faecalis* elicit immunosuppressive interactions with keratinocytes**

145 Keratinocytes, the predominant cell population in the skin, include undifferentiated (basal) and  
146 differentiated (suprabasal, hair follicle, outer bulge, and sebaceous gland) cells within the EPI cell class  
147 in both wound types (**Figure 1C**). Further analysis of the EPI class revealed 19 clusters (**Figure 2A** and  
148 **Table S5**), with the emergence of infection-specific clusters (**Figure 2B**, clusters 0 and 6, and **S2A**). We  
149 identified three major keratinocyte populations: (i) *Krt5*-expressing (*Krt5<sup>hi</sup>*) basal keratinocytes, (ii)  
150 *Krt10*-enriched (*Krt10<sup>hi</sup>*) post-mitotic keratinocytes, and (iii) *Krt5<sup>hi</sup>Krt10<sup>hi</sup>* co-expressing populations  
151 (**Figure 2C**). The co-expression of *Krt5* and *Krt10* was unique to infection-specific clusters (**Figure 2A**,  
152 clusters 0 and 6). We also observed distinct populations, including hair follicle stem cells (*Lrg5<sup>hi</sup>*; cluster  
153 10), differentiating basal cells (*Ivl<sup>hi</sup>*; clusters 7 and 8), terminally differentiated keratinocytes (*Lor<sup>hi</sup>*;  
154 clusters 2, 8, 16, 17), and bulge stem cells (*Krt15<sup>hi</sup>*; clusters 2, 9, 10, 17, 18) (**Figure 2D**), reflecting the  
155 skin's complexity.

156

157 The two largest infection-specific clusters exhibited distinct gene expression patterns, with cluster 0 and  
158 cluster 6, enriched in *Zeb2* and *Gjb6* expression, respectively (**Figure 2A**). These clusters represent  
159 migratory stem-like and partial EMT keratinocyte populations (**Figure 2E**). As the barrier to pathogens,  
160 keratinocytes secrete a broad range of cytokines that can induce inflammatory responses (Alshetaiwi  
161 et al., 2020; Siriwach et al., 2022; Veglia et al., 2021). However, *Zeb2<sup>hi</sup>* keratinocytes co-expressing  
162 *Cxcl2*, *Il1b*, and *Wfdc17*, indicate myeloid-derived suppressor cell-like phenotype which implies an  
163 immunosuppressive environment (Hofer et al., 2021; Veglia et al., 2021). Gene Ontology analysis  
164 revealed that the *Zeb2<sup>hi</sup>* and *Gjb6<sup>hi</sup>* clusters exhibited signatures related to ECM remodeling, chemokine  
165 signaling, migratory pathways, and inflammatory response (**Figures 2F, 2G, and Table S5**).  
166 Collectively, these findings suggest an early migratory role of keratinocytes induced by *E. faecalis*  
167 infection.

168

169 During cutaneous wound healing, keratinocytes enter a mesenchymal-like state, migrating to and  
170 proliferating within the wound site. We observed two infection-specific keratinocyte populations  
171 enriched in *Zeb2* and *Gjb6* expression, respectively, as early as four days post-wounding. To determine  
172 the nature of these populations, we performed RNA velocity analysis, a method that predicts the future  
173 state of individual cells based on the patterns of temporal gene expression (La Manno et al., 2018).  
174 RNA velocity analysis predicted a lineage relationship between *Zeb2<sup>hi</sup>* and *Gjb6<sup>hi</sup>* keratinocytes  
175 (**Figures 2H, 2I, and Table S5**). The top lineage-driver genes (Lange et al., 2022), including *Rgs1*, *H2-*  
176 *Aa*, *Ms4a6c*, *Cd74*, *H2-Eb1* and *H2-Ab1*, were predominantly expressed in the infection-specific cluster  
177 0 (**Figures 2J and S2B**). These genes are associated with the major histocompatibility complex (MHC)  
178 class II, suggesting a self-antigen presenting keratinocyte population, which have a role in co-  
179 stimulation of T cell responses (Meister et al., 2015; Tamoutounour et al., 2019). Meanwhile, *Gjb6<sup>hi</sup>*  
180 keratinocytes demonstrated reduced expression of putative genes such as *Pof1b*, *Krt77*, *Dnase1l3*, and  
181 *Krtdap* as well as increased *Clic4* expression (**Figure S2C**), suggesting that *E. faecalis* infection  
182 perturbs normal healing. Additionally, temporal expression analysis of high-likelihood genes revealed  
183 three distinct transcriptional states (**Figure 2K**): (1) an early state characterized by undifferentiated  
184 (basal) keratinocyte markers, (2) an intermediate state defined by the selection and upkeep of  
185 intraepithelial T cell protein family, and (3) a late state characterized by cell adhesion signatures. These  
186 findings provide insights into the cellular dynamics and developmental abnormalities, such as partial  
187 EMT induced by *E. faecalis* infection during wound healing.

188

189 Understanding cell-cell crosstalk through ligand-receptor interactions allows predicting ligand-target  
190 links between interacting cells by combining their expression data with signaling and gene regulatory  
191 network databases. Given our observation that infection-specific keratinocyte populations (**Figure S2**)  
192 were involved in ECM remodeling and immune response (**Figures 2F and 2G**), we hypothesized that  
193 these cells might participate in the SPP1 signaling pathway. SPP1 (secreted phosphoprotein 1 or  
194 osteopontin) is a chemokine-like protein secreted by immune cells, osteoblasts, osteocytes, and  
195 epithelial cells to facilitate anti-apoptotic immune responses (Denhardt et al., 2001; Standal et al., 2004).  
196 To decipher ligand-receptor interactions in uninfected and infected skin wounds, we performed cell-cell  
197 interaction analysis (Guerrero-Juarez et al., 2019). We found 34 predicted interactions in uninfected  
198 keratinocytes and 61 in keratinocytes from *E. faecalis*-infected wounds out of a total of 923 and 991

199 interactions, respectively, in our single-cell atlas (**Figures S1A, S1B, and Table S6**). Importantly, we  
200 detected outgoing signals from keratinocytes to other cells associated with EGF and SPP1 signaling  
201 pathways. Ligand:receptor pairs in the infected niche (**Figure S2D**) included Hbegf:Egfr for the EGF  
202 pathway and Spp1: Cd44, Spp1:(Itga5+Itgb1), Spp1:(Itga9+Itgb1), and Spp1:(Itgav+Itgb3) for the SPP1  
203 pathway (**Figures 2L, S2D, and S2E**), that are known to induce immunosuppression (Cheng et al.,  
204 2023; Gao et al., 2022). Remarkably, we observed the enrichment of keratinocyte-endothelial cell  
205 ligand:receptor pairs (**Figure S3 and Table S6**). By contrast, keratinocytes from uninfected wounds  
206 only showed macrophage migration inhibitory factor (MIF) ligand interactions with its receptors Cd44,  
207 Cd74, and Cxcr4 in immune cells (DC/LC and TRM) (**Figure S2G**), suggesting that these keratinocytes  
208 promote cell proliferation, wound healing, and survival (Farr et al., 2020; Jager et al., 2020).  
209 Furthermore, the RNA velocity of keratinocytes from uninfected wounds revealed a terminal hair follicle  
210 (*Lrg5<sup>hi</sup>*) and a proliferating keratinocyte (*Mki67<sup>hi</sup>*) population originating from basal keratinocytes (**Figure**  
211 **2H**), underlining normal wound healing. Overall, *E. faecalis* infection altered the transcriptome of  
212 keratinocytes towards a partial EMT at an early stage, whereas uninfected keratinocytes showed  
213 differentiating and terminally differentiated keratinocyte populations (**Figure 2M**). Our data show that  
214 epidermal cells undergo migratory and inflammatory gene regulation during normal wound healing  
215 (Haensel et al., 2020; Vu et al., 2022), whereas *E. faecalis* induces anti-inflammatory transcriptional  
216 modulation that may promote chronicity in bacteria-infected skin wounds. These findings demonstrate  
217 that keratinocytes exist in a low inflammation profile under homeostasis, which is exacerbated upon *E.*  
218 *faecalis* infection.

219

### 220 ***E. faecalis* delays immune response in fibroblasts**

221 Fibroblasts are the fundamental connective tissue cells involved in skin homeostasis and healing. Upon  
222 injury, they primarily (1) migrate into the wound site, (2) produce ECM by secreting growth factors, and  
223 (3) regulate the inflammatory response. Despite their high heterogeneity, fibroblast subpopulations  
224 have distinct roles in wound healing. In response to injury, fibroblasts produce increased amounts of  
225 ECM by inhibiting the metalloproteinase (MMP) family through the tissue inhibitor of metalloproteinases  
226 1 (TIMP1). Notably, Guerrero-Juarez *et al.* (2019) reported a rare fibroblast population expressing  
227 myeloid lineage cell markers during normal (uninfected) wound healing (Guerrero-Juarez et al., 2019).  
228 Our bioinformatic analysis identified fibroblast populations within wounds that differed significantly

229 between infected and uninfected conditions (**Figure S1F**). Further analysis of the fibroblast mega class  
230 revealed 12 distinct clusters, with clusters 0 and 2 specific to infection while retaining their fibroblastic  
231 identity (**Figures 3A, 3B, and Table S7**). The infection-associated fibroblasts express a range of  
232 markers, including those linked to extracellular matrix deposition such as *Col1a1*, *Col1a2*, *Col6a2*,  
233 vimentin (*Vim*), fibronectin, elastin (*Eln*), asporin (*Aspn*), platelet-derived growth factor receptor-beta  
234 (*Pdgfrb*), and fibroblast activator protein- $\alpha$  (*Fap*). These findings suggest a premature extracellular  
235 matrix deposition triggered by *E. faecalis*, which typically occurs in later stages of wound healing  
236 processes (Deng et al., 2021; Fang et al., 2023; Fitzgerald & Weiner, 2020) (**Figures 3C, 3D, S4A, and**  
237 **S4B**).

238  
239 The unique fibroblast clusters 0 and 2 associated with *E. faecalis* infection (**Figure 3E**) exhibited  
240 enrichment of myeloid-specific markers (*Hbb-bs*, *Lyz2*) and profibrotic gene signatures (*Inhba*, *Saa3*,  
241 *Timp1*) (**Table S6**). Additionally, *Lyz2<sup>hi</sup>* fibroblasts co-expressing *Tagln*, *Acta2*, and *Col12a1* suggested  
242 their origin as contractile myofibroblasts (Guerrero-Juarez et al., 2019). Gene Ontology analysis  
243 indicated that *Lyz2<sup>hi</sup>* fibroblasts were involved in immune response (**Figure 3F**), while *Timp1<sup>hi</sup>*  
244 fibroblasts were associated with tissue repair processes (**Figure 3G**). These findings collectively reveal  
245 an intricate cellular landscape within infected wounds, highlighting the detrimental functional  
246 contributions of various fibroblast subpopulations in response to *E. faecalis* infection.

247  
248 To validate the distinct fibroblast cell states and their differentiation potential, we performed RNA  
249 velocity analysis (**Figures 3H and 3I**), which revealed two terminal fibroblast populations: (1) a *Cilp<sup>hi</sup>*  
250 fibrotic cluster 4 and (2) an *Mkx<sup>hi</sup>* reparative cluster 5, originating from clusters 0 and 2 (**Figure 3I and**  
251 **Table S7**), indicating the mesenchymal characteristics of infection-specific fibroblasts. Lineage driver  
252 gene analysis supported these findings, with the expression of genes such as *Csgalnact1*, *Atrnl1*, *Slit3*,  
253 *Rbms3*, and *Magi2*, which are known to induce fibrotic tissue formation under pathological conditions  
254 (Gornicki et al., 2022; Mizumoto et al., 2020) (**Figures 3J and S4C**). Similarly, the activation of genes  
255 such as *Serping1*, *Sparc*, *Pcsk5*, *Fgf7*, and *Cyp7b1* (**Figure S4D**) indicated the temporal activation of  
256 cell migration and immune suppression during infection. CellRank analysis revealed two states: an  
257 initial prolonged state and a short terminal state (**Figure 3K**). The early transcriptional states were  
258 associated with apoptosis inhibition, cell adhesion, and immune evasion genes, including serine

259 protease inhibitors (*Serpine1* and *Serping1*), *Prrx1*, *Ncam1*, and *Chl1*, suggesting immune suppression.  
260 By contrast, the terminal state showed the emergence of migratory (*Cd74*, *Ifi202b*) and inflammatory  
261 (*Acod1*, *Cxcl2*, *F13a1*, and *S100a9*) genes, indicating a delayed immune response to *E. faecalis*  
262 infection. Overall, these findings indicate that uninfected fibroblasts contribute to healthy wound healing  
263 with proliferative and elastin-rich fibroblast populations. By contrast, *E. faecalis*-infected fibroblasts  
264 exhibit a pathological repair profile, characterized by the presence of *Timp1<sup>hi</sup>* and *Lyz2<sup>hi</sup>* fibroblasts  
265 (**Figure 3L**).

266  
267 To understand the role of fibroblast subpopulations in healing, we explored cell-cell interactions in  
268 fibroblasts in infected wound (**Figure S4E**). In *E. faecalis*-infected wounds, we observed interactions  
269 involving Spp1 ligand with cell adhesion receptor Cd44 and integrins (Itgav+Itgb1, Itgav+Itgb3,  
270 Itgav+Itgb5, Itga4+Itgb1, Itga5+Itgb1, Itga9+Itgb1), and EGF signaling pairing Ereg:Egfr (**Figures S4F**  
271 and **S4G**). These interactions were particularly strong between macrophages (ligands) and endothelial  
272 cells (receptors) (**Figure S2C**), suggesting their involvement in the infected wound microenvironment.  
273 By contrast, uninfected wounds showed a normal wound healing profile with reparative VEGF and TGF-  
274  $\beta$  signaling pathways (**Figures S4H** and **S4I**). Furthermore, RNA velocity analysis of fibroblasts from  
275 uninfected wounds revealed two terminal fibroblast populations originating from *Fbn1<sup>hi</sup>* fibroblasts:  
276 elastin-rich (*Eln<sup>hi</sup>*) fibroblasts and keratinocyte-like (*Krt1<sup>hi</sup>/Krt10<sup>hi</sup>*) fibroblasts (**Figure 3H**). Collectively,  
277 our findings revealed the unique roles of fibroblasts upon *E. faecalis* infection and reaffirmed the known  
278 functions of fibroblasts during uninfected wound healing, consistent with the outcomes of predicted  
279 ligand-receptor interactions (**Figure 3F**).

### 280 281 ***E. faecalis* promotes macrophage polarization towards an anti-inflammatory phenotype**

282 Immune cells play a crucial role in wound healing by eliminating pathogens, promoting keratinocyte and  
283 fibroblast activity, and resolving inflammation and tissue repair (Haensel et al., 2020; Landen et al.,  
284 2016; Vu et al., 2022). Our data reveal unique clusters enriched within keratinocytes and fibroblasts in  
285 *E. faecalis*-infected wounds, suggesting an immunosuppressive transcriptional program in these cell  
286 populations (**Figures S2A** and **S4B**). Given the ability of *E. faecalis* to actively suppress macrophage  
287 activation *in vitro* (Tien et al., 2017), we investigated if *E. faecalis* contributes to anti-inflammatory  
288 macrophage polarization and immune suppression *in vivo*. Analysis of the myeloid cells identified two



289 infection-specific macrophage clusters (clusters 2 and 5) among 12 clusters (**Figures 4A, 4B, and**  
290 **Table S8**). To validate infection-specific macrophage polarization, we performed qPCR on bulk tissue  
291 isolated from uninfected and infected wounds at 4 dpi. Infected wounds showed downregulation of *Mrc1*  
292 and upregulation of both *Arg1* and *Nos2* compared to uninfected wounds or unwounded bulk skin tissue  
293 (**Figure 4D**), which was further corroborated by examining gene expression in bone marrow-derived  
294 macrophages (BMDM) following *E. faecalis* infection *in vitro* (**Figure 4E**). The co-expression of both  
295 M1-like and M2-like macrophage markers during infection has been previously reported for *M.*  
296 *tuberculosis* (Mattila et al., 2013), *T. cruzi* (Cuervo et al., 2011), and *G. lamblia* infections (Maloney et  
297 al., 2015), as an indicator of an immunosuppressive phenotype that promotes an anti-inflammatory  
298 environment during prolonged infection. In myeloid clusters of our scRNA-seq atlas, tissue-resident  
299 macrophages (*Mrc1*) were predominant in uninfected wounds, while M2-like macrophages (*Arg1*) were  
300 abundant in macrophages from *E. faecalis*-infected wounds (**Figures 4F and 4G**), supporting the  
301 hypothesis of an anti-inflammatory wound environment during *E. faecalis* infection. Additionally, our  
302 analysis allowed the segregation of dendritic cells and Langerhans cells (cluster 10, *Cd207* and *Itgax*)  
303 from macrophage populations, characterized by the co-expression of langerin (*Cd207*) and integrin  
304 alpha X (*Itgax/Cd11c*) in cluster 10 (**Figure 4G**), confirming the validity of our cell annotation.

305

306 Next, we focused on the functions of infection-specific macrophage clusters 2 and 5 (**Figures 4B and**  
307 **S5B**) to identify their potential roles in wound infection. Gene Ontology analysis revealed that these  
308 macrophages were involved in the immune response, ECM production, and protein translation (**Figures**  
309 **S5C and S5D**). To better understand the evolution of infection-specific macrophages, we computed the  
310 RNA velocity to explore potential lineage relationships (**Figures 4H and 4I**). RNA velocity identified  
311 cluster 2 macrophages as the terminal population in the infected dataset (**Figure 4I**), whereas  
312 uninfected terminal macrophage populations were found as clusters 1 and 4 (**Figure 4H**). As expected,  
313 cluster 5 did not exhibit velocity vectors since these cells were highly segregated from the main myeloid  
314 clusters and differed vastly in their gene expression (**Table S8**). While both terminal macrophage  
315 populations in both uninfected and infection conditions co-host anti-inflammatory macrophage  
316 signatures, their transcriptional program and functions vary in the presence of *E. faecalis* infection.

317



318 To further characterize clusters 2 and 5, we explored differentially expressed genes in infected cells.  
319 We identified the inflammation-related genes *Fth1*, *Sipi*, *Il1b*, *AA467197* (*Nmes1/miR-147*), *Ptges*, and  
320 *Cxcl3* (**Figures 4J** and **S5E**), suggesting that these cells may play a role in tissue remodeling  
321 (Munadziroh et al., 2022; Recalcati et al., 2019). Similarly, the expression of the infected-specific top  
322 likelihood genes *Cxcl2*, *Cd36*, and *Pdpm* was associated with the presence of efferocytic M2-like  
323 macrophages (**Figure S5F**, green clusters). The distant *Sparc<sup>hi</sup>* macrophage cluster 5 exhibited C-C  
324 chemokine receptor type 7 (*Ccr7*) exhaustion (**Figure S5F**, red clusters), indicating that these cells  
325 might be of M1-like origin (Hu et al., 2020).

326

327 Next, to validate whether the terminal macrophage populations corresponding to clusters 2 and 5 were  
328 tissue-resident or M2-like macrophages, we computed the driver genes of macrophage sub-clusters  
329 over latent time. The top 50 likelihood gene heat map identified two major states in the macrophages  
330 (**Figure 4K**). The early state cells were enriched in antigen-presenting/processing MHC class II gene  
331 expression such as *H2-Ab1*, *H2-Eb1*, *H2-Eb2*, G-protein-coupled receptors (*Gpr137b*, *Grp171*, and  
332 *Gpr183*), and mannose receptor c-type 1 (*Mrc1/Cd206*). In contrast, *Cd36*, *Met*, *Sgms2*, *Fn1*, *Zeb2*,  
333 and *Arg2* levels were higher in the late macrophage population, suggesting M2-like polarization.  
334 Therefore, we asked whether these macrophages provide an immunosuppressive microenvironment  
335 during *E. faecalis* infection. Cellular interactome analysis revealed enrichment of the ANNEXIN  
336 signaling pathway, particularly Anxa1:Fpr1 and Anxa1:Fpr2 ligand-receptor pairs between M2-like  
337 macrophage and endothelial or neutrophil cells (**Figure S5I-K**), which inhibits pro-inflammatory cytokine  
338 production (Yang et al., 2009). Together, these results demonstrate that *E. faecalis* infection influences  
339 macrophage polarization towards an anti-inflammatory phenotype. Importantly, the ANXA1:FPR1  
340 interaction has been implicated in the tumor microenvironment of several malignancies (Cheng et al.,  
341 2014; Takaoka et al., 2018; Vecchi et al., 2018; Zhao et al., 2022), indicating that the *E. faecalis*-infected  
342 wound niche mimics the anti-inflammatory transcriptional program of the tumor microenvironment.

343

#### 344 **Neutrophils contribute to the anti-inflammatory microenvironment**

345 Our findings revealed an exacerbated inflammatory phenotype during infection (**Figures 2F**, **2G**, **3K**,  
346 and **4J**), specifically marked by an abundance of neutrophils (Chong et al., 2017) (**Figure 1D**). To  
347 facilitate a comparison of the broader immune niche, we focused on the neutrophil population,

348 identifying six subpopulations in the integrated dataset (**Figure 5A** and **Table S9**). Among these,  
349 clusters 0 and 2 were abundant in the infected condition (**Figures 5B** and **S6A**). The expression of  
350 granulocyte colony-stimulating factor receptor (*Csf3r*) and integrin subunit alpha M (*Itgam/Cd11b*) was  
351 highly expressed across all neutrophils (**Figure 5C**). Furthermore, the higher expression of chemokine  
352 (CXC motif) receptor 2 (*Cxcr2*), Fc gamma receptor III (*Fcgr3/Cd16*), and ferritin heavy chain (*Fth1*) in  
353 clusters 0, 1, 2, 4 and 5 indicated the presence of migrating and maturing neutrophils, regardless of  
354 infection status (**Figure 5D**). By contrast, cluster 3 did not express *Cxcr2* and *Fcgr3* and had lower  
355 expression of *Fth1* but was enriched in calcium/calmodulin-dependent protein kinase type ID (*Camk1d*),  
356 suggesting that this neutrophil subpopulation recruited to the infected wound site might be mature but  
357 inactive (Chen et al., 2023; Evrard et al., 2018)

358  
359 The infection-enriched neutrophils demonstrated a functional shift. Cluster 0 with higher expression of  
360 *Lrg1*, indicates an activated phagocytic phenotype (**Figure 5E-G**). By contrast, *Csf1<sup>hi</sup>* neutrophils  
361 (cluster 2) were associated with the negative regulation of apoptosis, cytokine production and neutrophil  
362 activation. *Csf1* upregulation in neutrophils mediates macrophage differentiation towards an  
363 immunotolerant phenotype (Braza et al., 2018), characterized by low expression of the lymphocyte  
364 antigen complex (LY6C) and increased proliferation rate. We then inspected the infected myeloid cells  
365 and observed a higher abundance of the cell proliferation marker, Ki-67 (*Mki67*), and the expression of  
366 lymphocyte antigen 6 complex locus 1 (*Ly6c1*). The expression of *Mki67* was specific to terminal  
367 macrophage population clusters 2 and 5 (**Figure S5G**) and the level of *Ly6c1* was lower in all  
368 macrophages but was specific to LCs (**Figure S5H**). These findings suggest that neutrophils may  
369 contribute to the anti-inflammatory polarization of *E. faecalis* infected macrophages.

370  
371 RNA velocity analysis also estimated infected neutrophils with a propensity to become *Lrg1<sup>hi</sup>* neutrophils  
372 (**Figure 5H**, cluster 0), driven by genes *Entpd1/Cd39*, *Picalm*, *Hdc*, *Cytip*, *Sipa111* and *Fos* (**Figures 5I**,  
373 **S6B** and **S6C**). Moreover, suppression of *Nfkbia* and chemokine ligand-2 (*Cxcl2*) and upregulation of  
374 calprotectin (*S100a9*) together indicate an inflammatory response to *E. faecalis* infection (**Figure S6B**).  
375 To identify molecular changes that could drive neutrophil state transitions, we sorted the genes based  
376 on their peak in pseudo-time, revealing the three distinct neutrophil states: early-stage, intermediate-  
377 stage, and late-stage, in the *E. faecalis*-infected wounds (**Figure 5J**). The early response was

378 characterized by *Ccl6*, *Il1f9* (*Il36g*), *Cxcl2*, *S100a6*, and *S100a9*, suggesting an initial pro-inflammatory  
379 neutrophil response. By contrast, the late stage demonstrated higher expression of ribosomal proteins  
380 (*Rpl5*, *Rpl19* and *Rpl26*), migratory metalloproteinases (*Mmp3*, *Mmp19* and *Adamts5*), and CXC motif  
381 ligand-1 (*Cxcl1*), suggesting perturbed neutrophil infiltration. MMP19 has also been implicated in M2  
382 polarization (Fingleton, 2017), consistent with the anti-inflammatory signatures of the infected  
383 macrophage populations (**Figures 4J** and **S5E**). Cellular interactome analysis further predicted the anti-  
384 inflammatory status of neutrophils by a strong correlation in the CCL signaling pathway between  
385 neutrophils and M2-like macrophages, particularly through the Ccl3:Ccr1 axis (**Figures 5K-M** and **S6D**),  
386 an interaction predictive of neutrophil extravasation during *E. faecalis* infection (Hautz et al., 2023).  
387 Neutrophil extravasation is a vital event in immune responses to infections to ensure the survival of the  
388 host (Theocharidis et al., 2022). In summary, our single-cell analysis of neutrophils during *E. faecalis*  
389 wound infection revealed a perturbed pro-inflammatory resolution during infection that may contribute  
390 to anti-inflammatory macrophage polarization. Furthermore, our findings uncover prominent differences  
391 in immune cell composition in infected wounds, featuring *Lrg1*-rich neutrophil abundance (cluster 0),  
392 together with the enrichment of *Arg1*<sup>hi</sup> M2-like macrophage polarization (clusters 2 and 5). As such,  
393 wound healing during *E. faecalis* is characterized by a dysregulated immune response compared to  
394 uninfected wounds, which could be associated with delayed healing or chronic infection.

395

### 396 **Anti-inflammatory macrophages induce pathogenic angiogenesis**

397 Based on the role of angiogenesis in tissue repair, and our observations of the anti-inflammatory  
398 signatures provided by keratinocytes, fibroblasts, and macrophages, we investigated their impact on  
399 endothelial cells (ECs). First, we analyzed the two endothelial cell (EC) populations in the integrated  
400 dataset and identified 13 clusters with high *Pecam1* and *Plvap* expression. Notably, clusters 0 and 8  
401 were exclusively found in the infected ECs. (**Figures 6A**, **6B**, and **S7A-C**). These clusters were involved  
402 in ECM deposition, cell differentiation, and development, indicating an anti-inflammatory niche (**Figures**  
403 **6C** and **6D**). Interestingly, RNA velocity analysis of infected ECs showed a faster velocity in the *Sparc*<sup>hi</sup>  
404 (cluster 0) and *Cilp*<sup>hi</sup> (cluster 8) cells, suggesting a dynamic transcriptional state (**Figure 6E**). The top  
405 lineage driver genes *Malat1*, *Tcf4*, *Rlcb1*, *Diaph2*, *Bmpr2*, and *Adamts9* indicate a pathogenic  
406 mechanism in proliferating ECs (**Figure 6F**).

407

408 We then explored whether the anti-inflammatory characteristics observed in infected epithelial cells,  
409 fibroblasts, and immune cells impacted ECs. To predict these cellular interactions, we conducted a  
410 differential NicheNet analysis (Browaeys et al., 2020), which involved linking the expression of ligands  
411 with corresponding receptors and downstream target gene expressions of these pairs in our scRNA-  
412 seq atlas of infected cells. Remarkably, NicheNet analysis revealed Il1b ligand of M2-like macrophages,  
413 correlated with the expression of target genes such as biglycan (*Bgn*), *Cd14*, *Ccl3*, *Csf3r*, *Ilgam* and  
414 *Tnf* in ECs (**Figures 6G** and **S7D**), in line with previous studies (Perrault et al., 2018; Vu et al., 2022).  
415 Notably, BGN, a proteoglycan, has been associated with tumor EC signatures (Cong et al., 2021;  
416 Morimoto et al., 2021), further supporting the anti-inflammatory role of M2-like macrophages observed  
417 in the infected dataset. Moreover, the infection-induced expression of *Cd14* in EC suggests Toll-like  
418 receptor (TLR) activation (Dauphinee & Karsan, 2006; Lloyd & Kubes, 2006). Cell-cell interaction  
419 analysis also predicted that the Ptgs2, Spp1 and Il1a ligand activity in M2-like macrophages influenced  
420 the expression of target genes such as calprotectin (*S100a8* and *S100a9*) and colony-stimulating factor  
421 3 (*Csf3*) These interactions suggest a potential disruption of EC integrity in the presence of *E. faecalis*  
422 infection. Similarly, according to the CellChat analysis, ECs exhibited activation of the SPP1 and CXCL  
423 signaling pathways (**Figures 6H-J**, **S7E** and **S7F**). Expression of the ligands Spp1, Cxcl2 and Cxcl3  
424 were abundant in keratinocytes, fibroblasts, and M2-like macrophages during the infection (**Figure 6J**).  
425 In the uninfected ECs, however, fibroblasts modulated the expression of target genes such as TEK  
426 tyrosine kinase (*Tek*), Forkhead box protein O1 (*Foxo1*) and selectin-E (*Sele*), with notable angiopoietin  
427 1 activity (**Figure S7D**), pointing to normal endothelial cell activity.

428  
429 During unperturbed wound healing, macrophages modulate angiogenesis by producing proteases,  
430 including matrix metalloproteinases (MMPs), which help degrade the extracellular matrix in the wound  
431 bed. Additionally, macrophages secrete chemotactic factors such as TNF- $\alpha$ , VEGF and TGF- $\beta$  to  
432 promote the EC migration (Du Cheyne et al., 2020; Wilkinson & Hardman, 2020). Furthermore, the  
433 TGF- $\beta$  signaling pathway induces fibroblast proliferation and ECM production in wound healing  
434 (Cutroneo, 2007; Pakyari et al., 2013). Our analysis of the cellular interactome in the uninfected wound  
435 dataset revealed strong interactions in the TGF- $\beta$  and VEGF signaling pathways (**Figure S7H-I**),  
436 corroborating previous studies (Joost et al., 2016; Vu et al., 2022). These findings suggest that  
437 uninfected wounds undergo reparative angiogenesis while *E. faecalis* infection evokes pathological

438 vascularization. Overall, our analysis underlines the M2-like macrophage-EC interactions as targets of  
439 altered cell-cell signaling during bacteria-infected wound healing.

## 440 DISCUSSION

441 Wound healing is an intricate process that involves the cooperation of various cellular and extracellular  
442 components. Disruptions to this network can perturb the healing dynamics. Previous scRNA-seq  
443 studies have primarily focused on the transcriptional profiles of epithelial and fibroblast populations in  
444 wound healing (Deng et al., 2021; Haensel et al., 2020; Joost et al., 2020; Joost et al., 2018; Joost et  
445 al., 2016). However, the impact of the host-pathogen interactions on wound healing transcriptional  
446 programs remains to be investigated. Here, our work presents the first comprehensive single-cell atlas  
447 of mouse skin wounds following infection, highlighting the transcriptional aberration in wound healing.  
448 *E. faecalis* has immunosuppressive activity in various tissues and infection sites (Chong et al., 2017;  
449 Kao et al., 2023; Kao & Kline, 2019; Tien et al., 2017). By surveying approximately 23,000 cells, we  
450 identified cell types, characterized shared and distinct transcriptional programs, and delineated terminal  
451 phenotypes and signaling pathways in homeostatic healing or bacterial wound infections. These  
452 scRNA-seq findings elucidate the immunosuppressive role of *E. faecalis* during wound infections,  
453 providing valuable insights into the underlying mechanisms.

454  
455 To explore the cellular landscape of *E. faecalis*-infected wounds and the impact of infection on wound  
456 healing, we focused on cell types specifically enriched in these tissues. Our analysis revealed infection-  
457 activated transcriptional states in keratinocytes, fibroblasts, and immune cells. The presence of clusters  
458 0 and 6, exclusive to the epithelial dataset, along with RNA velocity analysis pointing to *Zeb2*-expressing  
459 cells (**Figure 2I**), suggests a potential role of *E. faecalis* in promoting a partial EMT in keratinocytes.  
460 We also identified a terminal keratinocyte population (cluster 2) at 4 dpi, characterized by the  
461 consumption of *Krt77* and *Krt14* over pseudo-time, confirming terminal keratinocyte differentiation  
462 (**Figures 2I and S2C**). By contrast, uninfected wounds showed proliferating keratinocyte (*Mki67<sup>hi</sup>*) and  
463 hair follicle (*Lrg5<sup>hi</sup>*) cells (**Figure 2H**), consistent with previous findings on wound healing and skin  
464 maintenance signatures (Joost et al., 2020; Joost et al., 2018). Furthermore, we found two infection-  
465 specific fibroblast populations enriched in *Lyz2/Tagln* and *Timp1*, identifying their myofibroblast  
466 characteristics. The RNA velocity analysis confirmed cluster 5 as the terminal fibroblast population  
467 derived from myofibroblasts (cluster 2) (**Figure 3I**). Additionally, an increase in *Timp1* expression  
468 correlated with cell growth and proliferation signatures (*Sparc*, *Fgf7* and *Malat1*) over latent time in

469 cluster 5 (**Figures S4C and S4D**). These findings collectively demonstrate a profibrotic state in  
470 fibroblasts driven by *E. faecalis*-induced transcriptional dynamics.

471

472 To investigate the impact of immunosuppressive signatures in keratinocytes and fibroblasts, we  
473 examined how *E. faecalis* infection influenced the immune response in wounds. Given that prolonged  
474 macrophage survival is associated with impaired wound healing (Kim & Nair, 2019; Krzyszczyk et al.,  
475 2018), we primarily focused on the macrophage populations. We identified subpopulations of M2-like  
476 macrophages expressing *Arg1*, *Ptgs2* and *Sparc* genes (**Figure 4F-I**). COX-2 (cyclooxygenase-2,  
477 encoded by *Ptgs2* gene) has been reported as a crucial regulator of M2-like polarization in tumor-  
478 associated macrophages (Na et al., 2013; Wang et al., 2021). While macrophage polarization is  
479 complex in humans and other higher organisms (Orecchioni et al., 2019; Watanabe et al., 2019), our  
480 scRNA-seq data suggests that *E. faecalis* infection drives an anti-inflammatory microenvironment  
481 resembling the tumor microenvironment. These findings confirm and expand on previous studies  
482 highlighting the immunosuppressive role of *E. faecalis* in different contexts (Chong et al., 2017; Kao &  
483 Kline, 2019; Tien et al., 2017).

484

485 Our findings also elaborate on the potential cell-cell communication and signaling pathways involved in  
486 wound healing. Ligand-receptor interaction analysis revealed an immune-suppressive ecosystem  
487 driven by M2-like macrophages during bacterial infection (**Figure 6G**). CellChat analysis confirmed that  
488 M2-like macrophages play a crucial role in regulating angiogenesis through the Vegfa:Vegfr1 ligand-  
489 receptor pair (**Figures 6H, 6I, S7E, S7F, and Table S6**). Further, the *Spp1* ligand correlated with  
490 integrins (*Itgav+Itgb1*, *Itgav+Itgb3*, *Itga5+Itgb1*) and the cluster of differentiation receptor *Cd44* in ECs.  
491 Notably, while the *Spp1* ligand of macrophages registered strong interactions with ECs, infected  
492 keratinocytes and fibroblasts were identified as the primary sources of *Spp1* ligand. The infection-  
493 specific abundance of *Spp1* in these clusters highlight a partial EMT state in our extended analyses  
494 (**Figures 2E-I**). Furthermore, the interaction between *Spp1* and *Cd44* in M2-like macrophages and ECs  
495 indicated a proliferative state. The neutrophil chemokine *Cxcl2*, which promotes wound healing and  
496 angiogenesis (Girbl et al., 2018; Sawant et al., 2021), strongly correlated with the atypical chemokine  
497 receptor *Ackr1*, suggesting neutrophil extravasation. Additionally, the secretion of heparin-binding  
498 epidermal growth factor (*Hbegf*) by keratinocytes and epiregulin-enriched fibroblasts (*Ereg<sup>hi</sup>*) further

499 confirmed the presence of an anti-inflammatory microenvironment and angiogenic ECs in bacteria-  
500 infected wounds (**Figures 6H, 6I, and S7F**).

501

502 In summary, our study provides insights into the cellular landscape, transcriptional programs, and  
503 signaling pathways associated with uninfected and *E. faecalis*-infected skin wounds. We confirm the  
504 immune-suppressive role of *E. faecalis* in wound healing, consistent with previous findings in different  
505 experimental settings (Chong et al., 2017; Kao et al., 2023; Tien et al., 2017; Kao, 2023 #134).  
506 Importantly, we identify specific ligand-receptor pairs and signaling pathways affected during wound  
507 infection. The increased number of predicted signaling interactions suggests that *E. faecalis* modulates  
508 cellular communication to alter the immune response. Notably, the CXCL/SPP1 signaling pathway  
509 emerges as a critical player in shaping the immune-altering ecosystem during wound healing,  
510 highlighting its potential as a therapeutic target for chronic infections. Collectively, our findings  
511 demonstrate the collaborative role of keratinocytes, fibroblasts, and immune cells in immune  
512 suppression through CXCL/SPP1 signaling, providing new avenues for the treatment of chronic wound  
513 infections.

514

#### 515 **LIMITATIONS OF THE STUDY**

516 Our study provides a comprehensive comparison of the transcriptomic and cellular communication  
517 profiles between uninfected and *E. faecalis*-infected full-thickness mouse skin wounds at four days post-  
518 infection. However, our study lacks a reference dataset of uninfected, unwounded dorsal skin  
519 transcriptome, which would have allowed us to investigate transcriptomic changes temporally,  
520 especially induced by the wounding alone. Although we explored public datasets to address this  
521 limitation (Haensel et al., 2020; Vu et al., 2022), the low number of cells in public datasets, particularly  
522 for macrophage populations (data not shown), prevented their inclusion in our analysis. Additionally,  
523 the absence of multiple time points hinders our ability to examine temporal changes and the dynamic  
524 kinetics of host responses following infection.



525 **METHODS**

526 **KEY RESOURCES TABLE**

| REAGENT or RESOURCE                                                            | SOURCE                                           | IDENTIFIER                     |
|--------------------------------------------------------------------------------|--------------------------------------------------|--------------------------------|
| Chemicals                                                                      |                                                  |                                |
| Bovine serum albumin                                                           | Merck                                            | A7030                          |
| Brain Heart Infusion medium                                                    | Merck                                            | 53286                          |
| Collagenase type I                                                             | Thermo Fisher Scientific                         | 17100017                       |
| Dispase II                                                                     | Thermo Fisher Scientific                         | 17105041                       |
| Dulbecco's phosphate buffered saline w/o Ca <sup>2+</sup> and Mg <sup>2+</sup> | Thermo Fisher Scientific                         | 141900094                      |
| Hank's balanced salt solution w/o Ca <sup>2+</sup> and Mg <sup>2+</sup>        | Thermo Fisher Scientific                         | 88284                          |
| Isoflurane                                                                     | Vetpharma Animal Health                          | NA                             |
| Liberase TM                                                                    | Merck                                            | 5401119001                     |
| Luna SYBR Green                                                                | New England Biolabs                              | M3003                          |
| Nair Moisturising Hair Removal Cream                                           | Chruch and Dwight Co                             | NA                             |
| Recombinant Mouse M-CSF                                                        | BioLegend                                        | 576404                         |
| Phosphate buffered saline                                                      | Gibco                                            | 14190144                       |
| TRIzol                                                                         | Invitrogen                                       | 15596018                       |
| Trypsin/EDTA                                                                   | Gibco                                            | 25-051-CI                      |
| Chromium Next GEM Chip G Single Cell Kit                                       | 10x Genomics                                     | 1000127                        |
| Chromium Next GEM Single Cell 3' Gel Bead Kit v3.1                             | 10x Genomics                                     | 1000129                        |
| Chromium Next GEM Single Cell 3' GEM Kit v3.1                                  | 10x Genomics                                     | 1000130                        |
| Chromium Next GEM Single Cell 3' Kit v3.1                                      | 10x Genomics                                     | 1000269                        |
| Critical Commercial Assays                                                     |                                                  |                                |
| Dual Index Kit TT Set A                                                        | 10x Genomics                                     | 1000215                        |
| EZ-10 DNAaway RNA Mini-Preps kit                                               | Bio Basic                                        | BS88136-250                    |
| Library Construction Kit                                                       | 10x Genomics                                     | 1000196                        |
| RevertAid Reverse Transcriptase                                                | Thermo Fisher                                    | 01327685                       |
| Tube, Dynabeads MyOne SILANE                                                   | 10x Genomics                                     | 2000048                        |
| Bacterial Strains                                                              |                                                  |                                |
| <i>Enterococcus faecalis</i> OG1RF                                             | Dunny <i>et al.</i> (Dunny <i>et al.</i> , 1978) | WT OG1RF                       |
| Oligonucleotides                                                               |                                                  |                                |
| Gene                                                                           | Forward                                          | Reverse                        |
| <i>ActB</i>                                                                    | ATC AGC AAG CAG GAG TAC GAT                      | GTG TAA AAC GCA GCT CAG TAA CA |

|                                     |                                                           |                                                                                             |
|-------------------------------------|-----------------------------------------------------------|---------------------------------------------------------------------------------------------|
| <i>Arg1</i>                         | CAG AAG AAT GGA AGA GTC AG                                | CAG ATA TGC AGG GAG TCA CC                                                                  |
| <i>Egf</i>                          | TGG CTC GAA GTC AGA TCC ACA                               | TTC TCG GGC ACA TGG TTA ATG                                                                 |
| <i>Gapdh</i>                        | TCA GGA GAG TGT TTC CTC GTC CC                            | TCT CGG CCT TGA CTG TGC CG                                                                  |
| <i>Fgf1</i>                         | CCC TGA CCG AGA GGT TCA AC                                | GTC CCT TGT CCC ATC CAC G                                                                   |
| <i>Mrc1</i>                         | TTC AGC TAT TGG ACG CGA GG                                | GAA TCT GAC ACC CAG CGG AA                                                                  |
| <i>Nos2</i>                         | TGT CGC AGC TCC CTA TCT TG                                | GGA AGC CAC TGA CAC TTC GC                                                                  |
| <i>Pdgfa</i>                        | TGG CTC GAA GTC AGA TCC ACA                               | TTC TCG GGC ACA TGG TTA ATG                                                                 |
| <i>Tgfb1</i>                        | GGA AAT CAA CGG GAT CAG CCC                               | GCT GCC GCA CAC AGC AGT TC                                                                  |
| <i>Ubc</i>                          | CCC AGT GTT ACC ACC AAG AAG                               | CCC CAT CAC ACC CAA GAA CA                                                                  |
| Deposited Data                      |                                                           |                                                                                             |
| Raw and processed scRNA-seq data    | NCBI Gene Expression Omnibus                              | GSE229257                                                                                   |
| Processed Seurat Object             | Zenodo                                                    | <a href="https://doi.org/10.5281/zenodo.7608212">https://doi.org/10.5281/zenodo.7608212</a> |
| Experiment Models: Organisms/Strain |                                                           |                                                                                             |
| Mouse C57BL/6                       | InVivos                                                   | n/a                                                                                         |
| Software and Algorithms             |                                                           |                                                                                             |
| anndata 0.8.0                       | PyPI                                                      | <a href="https://pypi.org">https://pypi.org</a>                                             |
| BioRender                           | <a href="https://biorender.com">https://biorender.com</a> | n/a                                                                                         |
| CellChat 1.6.1                      | Jin <i>et al.</i> (Jin <i>et al.</i> , 2021)              | Jin <i>et al.</i> (Jin <i>et al.</i> , 2021)                                                |
| cellrank 1.5.1                      | Lange <i>et al.</i> (Lange <i>et al.</i> , 2022)          | <a href="#">Lange et al. (Lange et al., 2022)</a>                                           |
| Cell Ranger 6.1.2                   | 10X Genomics, Inc.                                        | <a href="https://www.10xgenomics.com">https://www.10xgenomics.com</a>                       |
| clustree 0.5.0                      | Zappia <i>et al.</i> (Zappia & Oshlack, 2018)             | <a href="#">Zappia et al. (Zappia &amp; Oshlack, 2018)</a>                                  |
| glmGamPoi 1.8.0                     | Ahlmann-Eltze <i>et al.</i> (Ahlmann-Eltze & Huber, 2021) | <a href="#">Ahlmann-Eltze et al. (Ahlmann-Eltze &amp; Huber, 2021)</a>                      |
| miQC 1.4.0                          | GitHub                                                    | <a href="https://github.com/greenelab/miQC">https://github.com/greenelab/miQC</a>           |
| NicheNet                            | Browaeys <i>et al.</i> (Browaeys <i>et al.</i> , 2020)    | <a href="#">Browaeys et al. (Browaeys et al., 2020)</a>                                     |
| numpy 1.23.5                        | PyPI                                                      | <a href="https://pypi.org">https://pypi.org</a>                                             |
| pandas 1.5.3                        | PyPI                                                      | <a href="https://pypi.org">https://pypi.org</a>                                             |
| PanglaoDB                           | PanglaoDB                                                 | <a href="https://panglaodb.se/markers.html">https://panglaodb.se/markers.html</a>           |
| Prism 9.4.1                         | GraphPad Software                                         | <a href="https://www.graphpad.com">https://www.graphpad.com</a>                             |
| PyCharm 2022.3.3                    | JetBrains                                                 | <a href="https://www.jetbrains.com">https://www.jetbrains.com</a>                           |
| Python 3.9.16                       | Python Software Foundation                                | <a href="https://python.org">https://python.org</a>                                         |
| R 4.2.1                             | The R Foundation                                          | <a href="https://www.r-project.org">https://www.r-project.org</a>                           |
| RStudio 2022.07.2+576               | Posit Software                                            | <a href="https://posit.co">https://posit.co</a>                                             |
| samtools 1.13                       | GitHub                                                    | <a href="https://github.com/samtools">https://github.com/samtools</a>                       |
| scanpy 1.9.1                        | PyPI                                                      | <a href="https://pypi.org">https://pypi.org</a>                                             |
| scipy 1.10.0                        | PyPI                                                      | <a href="https://pypi.org">https://pypi.org</a>                                             |
| scDbfFinder 1.10.0                  | Germain <i>et al.</i> (Germain <i>et al.</i> , 2021)      | <a href="#">Germain et al. (Germain et al., 2021)</a>                                       |

|                     |                                                        |                                                                                 |
|---------------------|--------------------------------------------------------|---------------------------------------------------------------------------------|
| sctransform 0.3.5   | Choudhary <i>et al.</i> (Choudhary & Satija, 2022)     | <a href="#">Choudhary <i>et al.</i> (Choudhary &amp; Satija, 2022)</a>          |
| scvelo 0.2.5        | Bergen <i>et al.</i> (Bergen <i>et al.</i> , 2020)     | <a href="#">Bergen <i>et al.</i> (Bergen <i>et al.</i>, 2020)</a>               |
| Seurat 4.3.0        | Hao <i>et al.</i> (Hao <i>et al.</i> , 2021)           | <a href="#">Hao <i>et al.</i> (Hao <i>et al.</i>, 2021)</a>                     |
| UMAP                | McInnes <i>et al.</i> (McInnes <i>et al.</i> , 2018)   | <a href="https://github.com/lmcinnes/umap">https://github.com/lmcinnes/umap</a> |
| velocity.py 0.17.17 | La Manno <i>et al.</i> (La Manno <i>et al.</i> , 2018) | <a href="#">La Manno <i>et al.</i> (La Manno <i>et al.</i>, 2018)</a>           |
| WGCNA 1.72-1        | Langfelder <i>et al.</i> (Langfelder & Horvath, 2008)  | <a href="#">Langfelder <i>et al.</i> (Langfelder &amp; Horvath, 2008)</a>       |

527

## 528 RESOURCE AVAILABILITY

### 529 Lead Contact

530 Further information and requests for resources should be directed to and will be fulfilled by the lead  
531 contacts, Kimberly Kline, at [kimberly.kline@unige.ch](mailto:kimberly.kline@unige.ch) and Guillaume Thibault, at [thibault@ntu.edu.sg](mailto:thibault@ntu.edu.sg).

532

### 533 Material Availability

534 This study did not generate new reagents.

535

### 536 Data and Code Availability

537 The accession number for the raw data reported in this paper is GSE229257. The processed data are  
538 available at Zenodo (<https://doi.org/10.5281/zenodo.7608212>).

539

## 540 METHOD DETAILS

### 541 Mouse wound infection model

542 *In vivo* procedures were approved by the Animal Care and Use Committee of the Biological Resource  
543 Centre (Nanyang Technological University, Singapore) in accordance with the guidelines of the Agri-  
544 Food and Veterinary Authority and the National Advisory Committee for Laboratory Animal Research  
545 of Singapore (ARF SBS/NIEA-0314). Male C57BL/6 mice were housed at the Research Support  
546 Building animal facility under pathogen-free conditions. Mice between 5-7 weeks old (22–25 g; InVivos,  
547 Singapore) were used for the wound infection model, modified from a previous study (Keogh *et al.*,  
548 2016). Briefly, mice were anesthetized with 3% isoflurane. Dorsal hair was removed by shaving,  
549 followed by hair removal cream (Nair cream, Church and Dwight Co) application. The shaven skin was  
550 then disinfected with 70% ethanol and a 6-mm full-thickness wound was created using a biopsy punch

551 (Integra Miltek, New York). Two mice were infected with 10  $\mu$ l of  $2 \times 10^8$  bacteria/ml inoculum  
552 (*Enterococcus faecalis* OG1RF strain), while the other two served as controls for uninfected wounds.  
553 All wounds were sealed with transparent dressing (Tegaderm, 3M, St Paul Minnesota). Mice were  
554 euthanized four days post-infection (4 dpi), and wounds collected immediately using a biopsy punch  
555 with minimal adjacent healthy skin were stored in Hanks 'Buffered Salt Solution (HBSS; Ca<sup>2+</sup>/Mg<sup>2+</sup>-free;  
556 Sigma Aldrich, Cat. #H4385) supplemented with 0.5% bovine serum albumin (BSA; Sigma Aldrich, Cat.  
557 #A7030).

558

### 559 ***In vitro* culture and infection of bone marrow-derived macrophages**

560 Murine bone marrow-derived macrophages (BMDMs) were isolated from bone marrow cells of 7-8  
561 weeks old C57BL/6 male mice as described previously (Toda et al., 2021), except that BMDMs were  
562 differentiated in 100 mm non-treated square dishes (Thermo Scientific, Singapore) with  
563 supplementation of 50 ng/ml M-CSF (BioLegend, Singapore). On day 6, differentiated BMDMs were  
564 harvested by gentle cell scraping in Dulbecco's PBS (DPBS; Gibco, Singapore), and  $10^6$  BMDMs were  
565 seeded in 6-well plates using bone marrow growth medium without antibiotics. Following overnight  
566 incubation, the growth medium was replaced with complete DMEM (DMEM supplemented with 10%  
567 FBS) for *E. faecalis* infection. Log-phase *E. faecalis* OG1RF cultures were washed and normalized to  
568 an OD<sub>600</sub>/ml of 0.5 in complete DMEM, equivalent to approximately  $3 \times 10^8$  CFU/ml. BMDMs were then  
569 infected with OG1RF at a multiplicity of infection (MOI) of 10 for 1 h, followed by centrifugation at 1,000  
570 x g for 5 min prior to incubation to promote BMDM-bacteria contact. For uninfected controls, complete  
571 DMEM was added instead of MOI 10 bacterial suspension. At 1 hpi, BMDM were washed thrice with  
572 DPBS and incubated in complete DMEM supplemented with 10  $\mu$ g/ml vancomycin and 150  $\mu$ g/ml  
573 gentamicin for 23 h to kill extracellular bacteria, until a final time point of 24 hpi.

574

### 575 **Quantitative qPCR analysis**

576 Total mRNA was extracted using the TRIzol reagent (Invitrogen, cat. # 15596018) and purified using  
577 an EZ-10 DNAaway RNA Mini-Preps Kit (Bio Basic, cat. #BS88136-250). Complementary DNA (cDNA)  
578 was synthesized from total RNA using RevertAid Reverse Transcriptase (Thermo Fisher, Waltham, MA,  
579 cat. # 01327685) according to the manufacturer's protocol. Real-time PCR was performed using Luna  
580 SYBR Green (New England Biolabs, UK) according to the manufacturer's protocol using a CFX-96

581 Real-time PCR system (Bio-Rad, Hercules, CA, USA). A 100-ng of cDNA and 0.25  $\mu$ M of the paired  
582 primer mix for target genes were used for each reaction. Relative mRNA was normalized to the  
583 housekeeping gene glyceraldehyde-3-phosphate dehydrogenase (*Gapdh*) or a geometric mean of Ct  
584 values from beta-actin (*Actb*) and ubiquitin (*Ubc*) housekeeping genes, as calculated by BestKeeper  
585 (Pfaffl et al., 2004) and log<sub>2</sub> fold changes were plotted with reference to the uninfected, unwounded  
586 skin. The primer pairs used in this study are listed in the Key Resources Table.

587

### 588 **Dissociation of tissue and library preparation**

589 Tissues were transferred to a sterile 10 mm<sup>2</sup> tissue culture dish and cut into small fragments using  
590 a sterile blade. The dissociation cocktail [10 mg/ml of dispase II (GIBCO, Cat. #17105041), 250  
591 mg/ml of collagenase type I (GIBCO, cat. #17100017), and 2.5 mg/ml of liberase TM (Roche, cat.  
592 #5401119001)] was dissolved in HBSS. The tissue was digested enzymatically in pre-warmed  
593 dissociation buffer for 2 h at 37°C with manual orbital shaking every 15 min and then the  
594 dissociated cells were sifted through a sterile 70- $\mu$ m cell strainer (Corning, cat. #352350) on ice and  
595 washed thrice with HBSS supplemented with 0.04% BSA. The remaining undigested tissue on the filter  
596 was re-incubated in 0.05%<sup>w/v</sup> trypsin/EDTA (GIBCO, cat. #25-051-CI) for 15 min at 37°C. Trypsin-  
597 digested cells were pooled with cells on ice by sifting through a sterile 70- $\mu$ m cell strainer. The  
598 pooled cell suspension was washed thrice with HBSS supplemented with 0.04% BSA, followed by final  
599 filtering using a sterile 40- $\mu$ m cell strainer (Corning, cat. #352340). The cell suspensions were  
600 centrifuged at 300 x *g* for 10 min, and the pellets were resuspended in Dulbecco's phosphate-buffered  
601 saline (DPBS; Thermo Fisher Scientific, cat. #14190094). Cell viability was determined by using  
602 Countess 3 FL Automated Cell Counter (Invitrogen) by mixing cell suspension with 0.4% trypan blue  
603 stain (Invitrogen, cat. #T10282) at a ratio of 1:1 for a minimum of four counts per sample. Isolated cells  
604 were encapsulated for single-cell RNA sequencing with microfluidic partitioning using the Chromium  
605 Single Cell 3' Reagent Kits (v3.1 Chemistry Dual Index, Protocol #CG000315), targeting 8,000 cells  
606 (10X Genomics, Pleasanton, CA). Libraries then were pooled by condition and sequenced on the  
607 HiSeq6000 system by NovogeneAIT (Singapore). A detailed protocol can be found at protocols.io  
608 ([dx.doi.org/10.17504/protocols.io.yxmvmn8m9g3p/v1](https://doi.org/10.17504/protocols.io.yxmvmn8m9g3p/v1)).

609

### 610 **Data Processing**

611 Raw data (.bcl) was used as an input to *Cell Ranger* (v6.1.2, 10X Genomics) with *mkfastq* function  
612 for trimming, base calling, and demultiplexing of reads by NovogeneAIT (Singapore). FASTQ files were  
613 aligned, filtered, barcoded and UMI counted using `cellranger count` command using *GENCODE*  
614 *vM23/Ensembl 98* (<https://cf.10xgenomics.com/supp/cell-exp/refdata-gex-GRCh38-2020-A.tar.gz>)  
615 mouse reference genome with `--expect cells` of 8,000 per sample on the National Supercomputer  
616 Centre Singapore (NSCC) High Power Computing platform (ASPIRE 1). The raw data can be found at  
617 Gene Expression Omnibus with the accession number GSE229257.

618

### 619 **Integration and downstream analysis**

620 Datasets from each sample were integrated using *Seurat* version 4.3.0 (Hao et al., 2021) on *R* (v4.2.1)  
621 using *RStudio* interface (*RStudio* 2022.07.2+576 "Spotted Wakerobin" release) on macOS Ventura  
622 (13.0.1). Briefly, *Seurat* objects were created based on the criteria of a minimum of 3 cells expressing  
623 a minimum of 200 features. Low-quality cells were determined by a probabilistic approach using the  
624 *miQC* package (v1.4.0). Similarly, doublets were removed with *scDbIFinder* v1.10.0 (Germain et al.,  
625 2021). Cell cycle stages were determined by using *Seurat's* built-in updated cell-cycle gene list. Feature  
626 counts were normalized using `SCTransform()` v2 regularization (Choudhary & Satija, 2022) with a  
627 scaling factor of  $1 \times 10^4$  and Gamma-Poisson Generalized Linear Model by `glmGamPoi()` function  
628 (Ahlmann-Eltze & Huber, 2021), during which cell cycles and mitochondrial genes were regressed out  
629 for integration of 3,000 anchors. Fourteen principal components (PC) were included in dimension  
630 reduction calculated by the point where the change of percentage of variation was more than 0.1%  
631 between the two consecutive PCs. First, *k*-Nearest Neighbors were computed using *pca* reduction,  
632 followed by identifying original Louvain clusters with a resolution of 0.7 calculated by *clustree* v0.5.0  
633 (Zappia & Oshlack, 2018). Uniform Manifold Approximation and Projection (UMAP) was used for  
634 visualization throughout the study (McInnes et al., 2018). A log 2-fold-change of 0.5 was set to identify  
635 gene expression markers for all clusters with `min.pct` of 0.25. Density plots were generated in the  
636 *Nebulosa* (v1.6.0) package to demonstrate specific cell population signatures. Finally, we computed  
637 weighted gene co-expression networks for describing the correlation patterns among genes across  
638 samples (Langfelder & Horvath, 2008). We also compared the 2D UMAP representations of the two  
639 conditions. Using the integrated dataset, we split the dataset based on the conditions by the built-in

640 `SplitObject()` function of the Seurat package. Then, we computed a cross-entropy test for the  
641 UMAP projections by applying a two-sided Kolmogorov-Smirnov test (Roca et al., 2023).

642

### 643 **Cell type annotation**

644 An unbiased cell annotation was conducted at two levels using the *ScType* algorithm with slight  
645 modifications (lanevski et al., 2022). First, we identified mega classes using gene set signatures on  
646 PanglaoDB (<https://panglaodb.se/>; Acc. date August 2022). Secondly, we further detailed each cluster  
647 based on published comprehensive mouse skin datasets (Joost et al., 2020; Joost et al., 2016). The  
648 processed Seurat object can be found at Zenodo (<https://doi.org/10.5281/zenodo.7608212>).

649

### 650 **Cell-cell interactions**

651 *NicheNet*'s differential *R* implementation (v1.1.1) was used to interrogate cell-cell interactions  
652 (Browaeys et al., 2020). Three databases provided, namely *ligand-target prior model*, *ligand-receptor*  
653 *network*, and *weighted integrated networks*, were used *NicheNet*'s *Seurat* wrapper where endothelial  
654 cells were set as the receiver (receptor) cell population, and keratinocytes, fibroblasts, and  
655 macrophages were defined as the sender (ligand) populations. The *NicheNet* heat map was plotted to  
656 visualize the ligand activity-target cell gene expression matrix. We further compared cell-cell  
657 interactions between different niches to better predict niche-specific ligand-receptor (L-R) pairs using  
658 differential *NicheNet* analysis. *CellChat* (v1.6.1) was used to further identify secreted ligand-receptor  
659 pairs across all cell populations (Jin et al., 2021).

660

### 661 **RNA velocity analysis**

662 BAM files generated during the alignment of the raw data in Cell Ranger, were sorted by cell barcodes  
663 with `sort -t CB` using *samtools* (v1.13) in the command line. Spliced and unspliced reads were  
664 annotated in *velocity.py* (v0.17.17) pipeline (La Manno et al., 2018), with repeats mask annotation file  
665 downloaded from <https://genome.ucsc.edu/> for mouse reference genome to generate `.loom` files. To  
666 solve full transcriptomics dynamics, we used the generalized dynamic model on *scVelo* v0.2.0 (Bergen  
667 et al., 2020) in *Python* 3 (v3.9.16) virtual environment set up in PyCharm (Education License v2022.3.3,  
668 build PY-223.8836.43; JetBrains, Czechia), and visualized main cell populations and subset analysis  
669 with velocity stream plots and individual genes that drive RNA velocity. Lineage driving genes were



670 computed in *CellRank* v1.5.1 (Lange et al., 2022). Annotated data (*anndata*) files for each cell  
671 population and condition can be found at <https://doi.org/10.5281/zenodo.7608772>. The R scripts and  
672 complete *Jupyter* notebooks are also available at [https://github.com/cenk-celik/Celik\\_et\\_al](https://github.com/cenk-celik/Celik_et_al).

673

#### 674 **Statistical analysis**

675 Statistical analyses were performed in *R*, python and Prism 9 (v9.4.1, GraphPad) whichever was  
676 applicable for the type of analysis. *P* values were adjusted with the Benjamini-Hochberg method for  
677 high-dimensional data analysis. The details of the significance and type of the test were indicated in the  
678 figure legends. Data are expressed as median  $\pm$  SEM. A p-value of 0.05 was set as a significance  
679 threshold unless stated otherwise.

680

#### 681 **ACKNOWLEDGEMENTS**

682 We are grateful to Drs. Claudia Stocks and Sophie Janssens for helpful discussions and critical reading  
683 of the manuscript. We thank the Singapore Centre for Environmental Life Sciences Engineering High  
684 Throughput Sequencing Unit for providing us with the Chromium Controller (10X Genomics) microfluidic  
685 partitioning instrument for single-cell encapsulation. The computational work for this article was partially  
686 performed on resources of the National Supercomputing Centre (NSCC), Singapore. This work was  
687 supported by funds from the National Medical Research Council Open Fund (MOH-000566 to K.A.K.  
688 and G.T. and MOH-000645 to K.A.K.), the Singapore Ministry of Education Academic Research Fund  
689 Tier 2 (MOE2019-T2-2-089 to K.A.K.), NTU Research Scholarship to S.Y.T.L. (predoctoral fellowship),  
690 and Nanyang President's Graduate Scholarship to F.R.T. Parts of this work were also supported by the  
691 National Research Foundation and Ministry of Education Singapore under its Research Centre of  
692 Excellence Program (SCELSE).

693

#### 694 **AUTHOR CONTRIBUTIONS**

695 Conceptualization, C.C., K.A.K. and G.T.; Methodology, C.C., F.R.T., K.A.K. and G.T.; Software, C.C.;  
696 Validation, C.C.; Formal Analysis, C.C. and F.R.T.; Investigation, C.C., S.Y.T.L., F.R.T., and M.V.;  
697 Resources, C.C. and M.V., Data Curation, C.C.; Writing – Original Draft; C.C., K.A.K., and G.T.; Writing  
698 – Review & Editing, S.Y.T.L., F.R.T., K.A.K., and G.T.; Visualization, C.C. and G.T.; Supervision, K.A.K.  
699 and G.T.; Project Administration, K.A.K. and G.T.; Funding Acquisition, K.A.K. and G.T.



700

701 **DECLARATION OF INTERESTS**

702 The authors declare no competing financial interests.

703

704 **ADDITIONAL FILES**

705 **Table S1.** Number of cells in each Louvain cluster grouped by condition. Related to Figure 1.

706 **Table S2.** Differential expression table of genes for the main class clusters. Related to Figure 1C.

707 **Table S3.** Differential expression table of genes for the main uninfected class clusters. Related to  
708 Figure 1C.

709 **Table S4.** Differential expression table of genes for the main infected class clusters. Related to Figure  
710 1C.

711 **Table S5.** Differential expression table of genes for sub-clustered keratinocytes. Related to Figure 2.

712 **Table S6.** CellChat comparison for ligand:receptor pairs for the uninfected and infected datasets.  
713 Related to Figures 2-6.

714 **Table S7.** Differential expression table of genes for sub-clustered fibroblasts. Related to Figure 3.

715 **Table S8.** Differential expression table of genes for sub-clustered myeloid clusters. Related to Figure  
716 4.

717 **Table S9.** Differential expression table of genes for sub-clustered neutrophil clusters. Related to  
718 Figure 5.

## 719 REFERENCES

- 720 Ahlmann-Eltze, C., & Huber, W. (2021). glmGamPoi: fitting Gamma-Poisson generalized linear models  
721 on single cell count data. *Bioinformatics*, 36(24), 5701-5702.  
722 <https://doi.org/10.1093/bioinformatics/btaa1009>
- 723 Alshetaiwi, H., Pervolarakis, N., McIntyre, L. L., Ma, D., Nguyen, Q., Rath, J. A., Nee, K., Hernandez,  
724 G., Evans, K., Torosian, L., Silva, A., Walsh, C., & Kessenbrock, K. (2020). Defining the  
725 emergence of myeloid-derived suppressor cells in breast cancer using single-cell  
726 transcriptomics. *Sci Immunol*, 5(44). <https://doi.org/10.1126/sciimmunol.aay6017>
- 727 Ashcroft, K. J., Syed, F., & Bayat, A. (2013). Site-specific keloid fibroblasts alter the behaviour of normal  
728 skin and normal scar fibroblasts through paracrine signalling. *PLoS One*, 8(12), e75600.  
729 <https://doi.org/10.1371/journal.pone.0075600>
- 730 Bao, Y., Sakinc, T., Laverde, D., Wobser, D., Benachour, A., Theilacker, C., Hartke, A., & Huebner, J.  
731 (2012). Role of mprF1 and mprF2 in the pathogenicity of *Enterococcus faecalis*. *PLoS One*,  
732 7(6), e38458. <https://doi.org/10.1371/journal.pone.0038458>
- 733 Bergen, V., Lange, M., Peidli, S., Wolf, F. A., & Theis, F. J. (2020). Generalizing RNA velocity to  
734 transient cell states through dynamical modeling. *Nat Biotechnol*, 38(12), 1408-1414.  
735 <https://doi.org/10.1038/s41587-020-0591-3>
- 736 Bertuccini, L., Ammendolia, M. G., Superti, F., & Baldassarri, L. (2002). Invasion of HeLa cells by  
737 *Enterococcus faecalis* clinical isolates. *Med Microbiol Immunol*, 191(1), 25-31.  
738 <https://doi.org/10.1007/s00430-002-0115-4>
- 739 Braza, M. S., Conde, P., Garcia, M., Cortegano, I., Brahmachary, M., Pothula, V., Fay, F., Boros, P.,  
740 Werner, S. A., Ginhoux, F., Mulder, W. J. M., & Ochando, J. (2018). Neutrophil derived CSF1  
741 induces macrophage polarization and promotes transplantation tolerance. *Am J Transplant*,  
742 18(5), 1247-1255. <https://doi.org/10.1111/ajt.14645>
- 743 Browaeys, R., Saelens, W., & Saeys, Y. (2020). NicheNet: modeling intercellular communication by  
744 linking ligands to target genes. *Nat Methods*, 17(2), 159-162. <https://doi.org/10.1038/s41592-019-0667-5>
- 746 Ch'ng, J. H., Chong, K. K. L., Lam, L. N., Wong, J. J., & Kline, K. A. (2019). Biofilm-associated infection  
747 by enterococci. *Nat Rev Microbiol*, 17(2), 82-94. <https://doi.org/10.1038/s41579-018-0107-z>
- 748 Chen, J., Bai, Y., Xue, K., Li, Z., Zhu, Z., Li, Q., Yu, C., Li, B., Shen, S., Qiao, P., Li, C., Luo, Y., Qiao,  
749 H., Dang, E., Yin, W., Gudjonsson, J. E., Wang, G., & Shao, S. (2023). CREB1-driven  
750 CXCR4(hi) neutrophils promote skin inflammation in mouse models and human patients. *Nat*  
751 *Commun*, 14(1), 5894. <https://doi.org/10.1038/s41467-023-41484-3>
- 752 Cheng, J. B., Sedgewick, A. J., Finnegan, A. I., Harirchian, P., Lee, J., Kwon, S., Fassett, M. S.,  
753 Golovato, J., Gray, M., Ghadially, R., Liao, W., Perez White, B. E., Mauro, T. M., Mully, T., Kim,  
754 E. A., Sbitany, H., Neuhaus, I. M., Grekin, R. C., Yu, S. S., Gray, J. W., Purdom, E., Paus, R.,  
755 Vaske, C. J., Benz, S. C., Song, J. S., & Cho, R. J. (2018). Transcriptional Programming of  
756 Normal and Inflamed Human Epidermis at Single-Cell Resolution. *Cell Rep*, 25(4), 871-883.  
757 <https://doi.org/10.1016/j.celrep.2018.09.006>
- 758 Cheng, M., Liang, G., Yin, Z., Lin, X., Sun, Q., & Liu, Y. (2023). Immunosuppressive role of SPP1-CD44  
759 in the tumor microenvironment of intrahepatic cholangiocarcinoma assessed by single-cell RNA  
760 sequencing. *J Cancer Res Clin Oncol*, 149(9), 5497-5512. <https://doi.org/10.1007/s00432-022-04498-w>
- 762 Cheng, T. Y., Wu, M. S., Lin, J. T., Lin, M. T., Shun, C. T., Hua, K. T., & Kuo, M. L. (2014). Formyl  
763 Peptide receptor 1 expression is associated with tumor progression and survival in gastric  
764 cancer. *Anticancer Res*, 34(5), 2223-2229. <https://www.ncbi.nlm.nih.gov/pubmed/24778024>
- 765 Chong, K. K. L., Tay, W. H., Janela, B., Yong, A. M. H., Liew, T. H., Madden, L., Keogh, D., Barkham,  
766 T. M. S., Ginhoux, F., Becker, D. L., & Kline, K. A. (2017). *Enterococcus faecalis* Modulates  
767 Immune Activation and Slows Healing During Wound Infection. *J Infect Dis*, 216(12), 1644-  
768 1654. <https://doi.org/10.1093/infdis/jix541>
- 769 Choudhary, S., & Satija, R. (2022). Comparison and evaluation of statistical error models for scRNA-  
770 seq. *Genome Biol*, 23(1), 27. <https://doi.org/10.1186/s13059-021-02584-9>
- 771 Cong, L., Maishi, N., Annan, D. A., Young, M. F., Morimoto, H., Morimoto, M., Nam, J. M., Hida, Y., &  
772 Hida, K. (2021). Inhibition of stromal biglycan promotes normalization of the tumor  
773 microenvironment and enhances chemotherapeutic efficacy. *Breast Cancer Res*, 23(1), 51.  
774 <https://doi.org/10.1186/s13058-021-01423-w>
- 775 Cuervo, H., Guerrero, N. A., Carbajosa, S., Beschin, A., De Baetselier, P., Girones, N., & Fresno, M.  
776 (2011). Myeloid-derived suppressor cells infiltrate the heart in acute *Trypanosoma cruzi*  
777 infection. *J Immunol*, 187(5), 2656-2665. <https://doi.org/10.4049/jimmunol.1002928>

- 778 Cutroneo, K. R. (2007). TGF-beta-induced fibrosis and SMAD signaling: oligo decoys as natural  
779 therapeutics for inhibition of tissue fibrosis and scarring. *Wound Repair Regen*, *15 Suppl 1*,  
780 S54-60. <https://doi.org/10.1111/j.1524-475X.2007.00226.x>
- 781 da Silva, R. A. G., Tay, W. H., Ho, F. K., Tanoto, F. R., Chong, K. K. L., Choo, P. Y., Ludwig, A., &  
782 Kline, K. A. (2022). Enterococcus faecalis alters endo-lysosomal trafficking to replicate and  
783 persist within mammalian cells. *PLoS Pathog*, *18(4)*, e1010434.  
784 <https://doi.org/10.1371/journal.ppat.1010434>
- 785 Dauphinee, S. M., & Karsan, A. (2006). Lipopolysaccharide signaling in endothelial cells. *Lab Invest*,  
786 *86(1)*, 9-22. <https://doi.org/10.1038/labinvest.3700366>
- 787 Deng, C. C., Hu, Y. F., Zhu, D. H., Cheng, Q., Gu, J. J., Feng, Q. L., Zhang, L. X., Xu, Y. P., Wang, D.,  
788 Rong, Z., & Yang, B. (2021). Single-cell RNA-seq reveals fibroblast heterogeneity and  
789 increased mesenchymal fibroblasts in human fibrotic skin diseases. *Nat Commun*, *12(1)*, 3709.  
790 <https://doi.org/10.1038/s41467-021-24110-y>
- 791 Denhardt, D. T., Noda, M., O'Regan, A. W., Pavlin, D., & Berman, J. S. (2001). Osteopontin as a means  
792 to cope with environmental insults: regulation of inflammation, tissue remodeling, and cell  
793 survival. *J Clin Invest*, *107(9)*, 1055-1061. <https://doi.org/10.1172/JCI12980>
- 794 Der, E., Suryawanshi, H., Morozov, P., Kustagi, M., Goilav, B., Ranabothu, S., Izmirly, P., Clancy, R.,  
795 Belmont, H. M., Koenigsberg, M., Mokrzycki, M., Rominiaki, H., Graham, J. A., Rocca, J. P.,  
796 Bornkamp, N., Jordan, N., Schulte, E., Wu, M., Pullman, J., Slowikowski, K., Raychaudhuri, S.,  
797 Guthridge, J., James, J., Buyon, J., Tuschl, T., Putterman, C., Accelerating Medicines  
798 Partnership Rheumatoid, A., & Systemic Lupus Erythematosus, C. (2019). Tubular cell and  
799 keratinocyte single-cell transcriptomics applied to lupus nephritis reveal type I IFN and fibrosis  
800 relevant pathways. *Nat Immunol*, *20(7)*, 915-927. <https://doi.org/10.1038/s41590-019-0386-1>
- 801 Du Cheyne, C., Tay, H., & De Spiegelaere, W. (2020). The complex TIE between macrophages and  
802 angiogenesis. *Anat Histol Embryol*, *49(5)*, 585-596. <https://doi.org/10.1111/ahc.12518>
- 803 Dunny, G. M., Brown, B. L., & Clewell, D. B. (1978). Induced cell aggregation and mating in  
804 *Streptococcus faecalis*: evidence for a bacterial sex pheromone. *Proc Natl Acad Sci U S A*,  
805 *75(7)*, 3479-3483. <https://doi.org/10.1073/pnas.75.7.3479>
- 806 Eming, S. A., Martin, P., & Tomic-Canic, M. (2014). Wound repair and regeneration: mechanisms,  
807 signaling, and translation. *Sci Transl Med*, *6(265)*, 265sr266.  
808 <https://doi.org/10.1126/scitranslmed.3009337>
- 809 Evrard, M., Kwok, I. W. H., Chong, S. Z., Teng, K. W. W., Becht, E., Chen, J., Sieow, J. L., Penny, H.  
810 L., Ching, G. C., Devi, S., Adrover, J. M., Li, J. L. Y., Liong, K. H., Tan, L., Poon, Z., Foo, S.,  
811 Chua, J. W., Su, I. H., Balabanian, K., Bachelierie, F., Biswas, S. K., Larbi, A., Hwang, W. Y.  
812 K., Madan, V., Koeffler, H. P., Wong, S. C., Newell, E. W., Hidalgo, A., Ginhoux, F., & Ng, L.  
813 G. (2018). Developmental Analysis of Bone Marrow Neutrophils Reveals Populations  
814 Specialized in Expansion, Trafficking, and Effector Functions. *Immunity*, *48(2)*, 364-379 e368.  
815 <https://doi.org/10.1016/j.immuni.2018.02.002>
- 816 Fang, T., Zhang, L., Yin, X., Wang, Y., Zhang, X., Bian, X., Jiang, X., Yang, S., & Xue, Y. (2023). The  
817 prognostic marker elastin correlates with epithelial-mesenchymal transition and vimentin-  
818 positive fibroblasts in gastric cancer. *J Pathol Clin Res*, *9(1)*, 56-72.  
819 <https://doi.org/10.1002/cjp2.298>
- 820 Farr, L., Ghosh, S., & Moonah, S. (2020). Role of MIF Cytokine/CD74 Receptor Pathway in Protecting  
821 Against Injury and Promoting Repair. *Front Immunol*, *11*, 1273.  
822 <https://doi.org/10.3389/fimmu.2020.01273>
- 823 Fingleton, B. (2017). Matrix metalloproteinases as regulators of inflammatory processes. *Biochim*  
824 *Biophys Acta Mol Cell Res*, *1864(11 Pt A)*, 2036-2042.  
825 <https://doi.org/10.1016/j.bbamcr.2017.05.010>
- 826 Fitzgerald, A. A., & Weiner, L. M. (2020). The role of fibroblast activation protein in health and  
827 malignancy. *Cancer Metastasis Rev*, *39(3)*, 783-803. <https://doi.org/10.1007/s10555-020-09909-3>
- 829 Franzen, O., Gan, L. M., & Bjorkegren, J. L. M. (2019). PanglaoDB: a web server for exploration of  
830 mouse and human single-cell RNA sequencing data. *Database (Oxford)*, *2019*.  
831 <https://doi.org/10.1093/database/baz046>
- 832 Gao, W., Liu, D., Sun, H., Shao, Z., Shi, P., Li, T., Yin, S., & Zhu, T. (2022). SPP1 is a prognostic related  
833 biomarker and correlated with tumor-infiltrating immune cells in ovarian cancer. *BMC Cancer*,  
834 *22(1)*, 1367. <https://doi.org/10.1186/s12885-022-10485-8>
- 835 Gentry-Weeks, C. R., Karkhoff-Schweizer, R., Pikis, A., Estay, M., & Keith, J. M. (1999). Survival of  
836 *Enterococcus faecalis* in mouse peritoneal macrophages. *Infect Immun*, *67(5)*, 2160-2165.  
837 <https://doi.org/10.1128/IAI.67.5.2160-2165.1999>

- 838 Germain, P. L., Lun, A., Garcia Meixide, C., Macnair, W., & Robinson, M. D. (2021). Doublet  
839 identification in single-cell sequencing data using scDblFinder. *F1000Res*, *10*, 979.  
840 <https://doi.org/10.12688/f1000research.73600.2>
- 841 Girbl, T., Lenn, T., Perez, L., Rolas, L., Barkaway, A., Thirirot, A., Del Fresno, C., Lynam, E., Hub, E.,  
842 Thelen, M., Graham, G., Alon, R., Sancho, D., von Andrian, U. H., Voisin, M. B., Rot, A., &  
843 Nourshargh, S. (2018). Distinct Compartmentalization of the Chemokines CXCL1 and CXCL2  
844 and the Atypical Receptor ACKR1 Determine Discrete Stages of Neutrophil Diapedesis.  
845 *Immunity*, *49*(6), 1062-1076 e1066. <https://doi.org/10.1016/j.immuni.2018.09.018>
- 846 Gornicki, T., Lambrinow, J., Mrozowska, M., Podhorska-Okolow, M., Dziegiel, P., & Grzegorzolka, J.  
847 (2022). Role of RBMS3 Novel Potential Regulator of the EMT Phenomenon in Physiological  
848 and Pathological Processes. *Int J Mol Sci*, *23*(18). <https://doi.org/10.3390/ijms231810875>
- 849 Guasch, G., Schober, M., Pasolli, H. A., Conn, E. B., Polak, L., & Fuchs, E. (2007). Loss of TGFbeta  
850 signaling destabilizes homeostasis and promotes squamous cell carcinomas in stratified  
851 epithelia. *Cancer Cell*, *12*(4), 313-327. <https://doi.org/10.1016/j.ccr.2007.08.020>
- 852 Guerrero-Juarez, C. F., Dedhia, P. H., Jin, S., Ruiz-Vega, R., Ma, D., Liu, Y., Yamaga, K., Shestova,  
853 O., Gay, D. L., Yang, Z., Kessenbrock, K., Nie, Q., Pear, W. S., Cotsarelis, G., & Plikus, M. V.  
854 (2019). Single-cell analysis reveals fibroblast heterogeneity and myeloid-derived adipocyte  
855 progenitors in murine skin wounds. *Nat Commun*, *10*(1), 650. [https://doi.org/10.1038/s41467-](https://doi.org/10.1038/s41467-018-08247-x)  
856 [018-08247-x](https://doi.org/10.1038/s41467-018-08247-x)
- 857 Haensel, D., Jin, S., Sun, P., Cinco, R., Dragan, M., Nguyen, Q., Cang, Z., Gong, Y., Vu, R., MacLean,  
858 A. L., Kessenbrock, K., Gratton, E., Nie, Q., & Dai, X. (2020). Defining Epidermal Basal Cell  
859 States during Skin Homeostasis and Wound Healing Using Single-Cell Transcriptomics. *Cell*  
860 *Rep*, *30*(11), 3932-3947 e3936. <https://doi.org/10.1016/j.celrep.2020.02.091>
- 861 Hao, Y., Hao, S., Andersen-Nissen, E., Mauck, W. M., 3rd, Zheng, S., Butler, A., Lee, M. J., Wilk, A. J.,  
862 Darby, C., Zager, M., Hoffman, P., Stoeckius, M., Papalexi, E., Mimitou, E. P., Jain, J.,  
863 Srivastava, A., Stuart, T., Fleming, L. M., Yeung, B., Rogers, A. J., McElrath, J. M., Blish, C. A.,  
864 Gottardo, R., Smibert, P., & Satija, R. (2021). Integrated analysis of multimodal single-cell data.  
865 *Cell*, *184*(13), 3573-3587 e3529. <https://doi.org/10.1016/j.cell.2021.04.048>
- 866 Hautz, T., Salcher, S., Fodor, M., Sturm, G., Ebner, S., Mair, A., Trebo, M., Untergasser, G., Sopper,  
867 S., Cardini, B., Martowicz, A., Hofmann, J., Daum, S., Kalb, M., Resch, T., Krendl, F.,  
868 Weissenbacher, A., Otarashvili, G., Obrist, P., Zelger, B., Ofner, D., Trajanoski, Z., Troppmair,  
869 J., Oberhuber, R., Pircher, A., Wolf, D., & Schneeberger, S. (2023). Immune cell dynamics  
870 deconvoluted by single-cell RNA sequencing in normothermic machine perfusion of the liver.  
871 *Nat Commun*, *14*(1), 2285. <https://doi.org/10.1038/s41467-023-37674-8>
- 872 Hofer, F., Di Sario, G., Musiu, C., Sartoris, S., De Sanctis, F., & Ugel, S. (2021). A Complex Metabolic  
873 Network Confers Immunosuppressive Functions to Myeloid-Derived Suppressor Cells  
874 (MDSCs) within the Tumour Microenvironment. *Cells*, *10*(10).  
875 <https://doi.org/10.3390/cells10102700>
- 876 Horsley, H., Dharmasena, D., Malone-Lee, J., & Rohn, J. L. (2018). A urine-dependent human urothelial  
877 organoid offers a potential alternative to rodent models of infection. *Sci Rep*, *8*(1), 1238.  
878 <https://doi.org/10.1038/s41598-018-19690-7>
- 879 Horsley, H., Malone-Lee, J., Holland, D., Tuz, M., Hibbert, A., Kelsey, M., Kupelian, A., & Rohn, J. L.  
880 (2013). Enterococcus faecalis subverts and invades the host urothelium in patients with chronic  
881 urinary tract infection. *PLoS One*, *8*(12), e83637. <https://doi.org/10.1371/journal.pone.0083637>
- 882 Hu, J., Ma, Y., Ma, J., Chen, S., Zhang, X., Guo, S., Huang, Z., Yue, T., Yang, Y., Ning, Y., Zhu, J.,  
883 Wang, P., Wang, X., Chen, G., & Liu, Y. (2020). Macrophage-derived SPARC Attenuates M2-  
884 mediated Pro-tumour Phenotypes. *J Cancer*, *11*(10), 2981-2992.  
885 <https://doi.org/10.7150/jca.39651>
- 886 Ianevski, A., Giri, A. K., & Aittokallio, T. (2022). Fully-automated and ultra-fast cell-type identification  
887 using specific marker combinations from single-cell transcriptomic data. *Nat Commun*, *13*(1),  
888 1246. <https://doi.org/10.1038/s41467-022-28803-w>
- 889 Jager, B., Klatt, D., Plappert, L., Golpon, H., Lienenklaus, S., Barbosa, P. D., Schambach, A., & Prasse,  
890 A. (2020). CXCR4/MIF axis amplifies tumor growth and epithelial-mesenchymal interaction in  
891 non-small cell lung cancer. *Cell Signal*, *73*, 109672.  
892 <https://doi.org/10.1016/j.cellsig.2020.109672>
- 893 Jin, S., Guerrero-Juarez, C. F., Zhang, L., Chang, I., Ramos, R., Kuan, C. H., Myung, P., Plikus, M. V.,  
894 & Nie, Q. (2021). Inference and analysis of cell-cell communication using CellChat. *Nat*  
895 *Commun*, *12*(1), 1088. <https://doi.org/10.1038/s41467-021-21246-9>



- 896 Joost, S., Annusver, K., Jacob, T., Sun, X., Dalessandri, T., Sivan, U., Sequeira, I., Sandberg, R., &  
897 Kasper, M. (2020). The Molecular Anatomy of Mouse Skin during Hair Growth and Rest. *Cell*  
898 *Stem Cell*, 26(3), 441-457 e447. <https://doi.org/10.1016/j.stem.2020.01.012>
- 899 Joost, S., Jacob, T., Sun, X., Annusver, K., La Manno, G., Sur, I., & Kasper, M. (2018). Single-Cell  
900 Transcriptomics of Traced Epidermal and Hair Follicle Stem Cells Reveals Rapid Adaptations  
901 during Wound Healing. *Cell Rep*, 25(3), 585-597 e587.  
902 <https://doi.org/10.1016/j.celrep.2018.09.059>
- 903 Joost, S., Zeisel, A., Jacob, T., Sun, X., La Manno, G., Lonnerberg, P., Linnarsson, S., & Kasper, M.  
904 (2016). Single-Cell Transcriptomics Reveals that Differentiation and Spatial Signatures Shape  
905 Epidermal and Hair Follicle Heterogeneity. *Cell Syst*, 3(3), 221-237 e229.  
906 <https://doi.org/10.1016/j.cels.2016.08.010>
- 907 Kandaswamy, K., Liew, T. H., Wang, C. Y., Huston-Warren, E., Meyer-Hoffert, U., Hultenby, K.,  
908 Schroder, J. M., Caparon, M. G., Normark, S., Henriques-Normark, B., Hultgren, S. J., & Kline,  
909 K. A. (2013). Focal targeting by human beta-defensin 2 disrupts localized virulence factor  
910 assembly sites in *Enterococcus faecalis*. *Proc Natl Acad Sci U S A*, 110(50), 20230-20235.  
911 <https://doi.org/10.1073/pnas.1319066110>
- 912 Kao, P. H., Ch'ng, J. H., Chong, K. K. L., Stocks, C. J., Wong, S. L., & Kline, K. A. (2023). *Enterococcus*  
913 *faecalis* suppresses *Staphylococcus aureus*-induced NETosis and promotes bacterial survival  
914 in polymicrobial infections. *FEMS Microbes*, 4, xtad019.  
915 <https://doi.org/10.1093/femsmc/xtad019>
- 916 Kao, P. H. N., & Kline, K. A. (2019). Dr. Jekyll and Mr. Hide: How *Enterococcus faecalis* Subverts the  
917 Host Immune Response to Cause Infection. *J Mol Biol*, 431(16), 2932-2945.  
918 <https://doi.org/10.1016/j.jmb.2019.05.030>
- 919 Keogh, D., Tay, W. H., Ho, Y. Y., Dale, J. L., Chen, S., Umashankar, S., Williams, R. B. H., Chen, S.  
920 L., Dunny, G. M., & Kline, K. A. (2016). Enterococcal Metabolite Cues Facilitate Interspecies  
921 Niche Modulation and Polymicrobial Infection. *Cell Host Microbe*, 20(4), 493-503.  
922 <https://doi.org/10.1016/j.chom.2016.09.004>
- 923 Kim, S. Y., & Nair, M. G. (2019). Macrophages in wound healing: activation and plasticity. *Immunol Cell*  
924 *Biol*, 97(3), 258-267. <https://doi.org/10.1111/imcb.12236>
- 925 Krzyszczyk, P., Schloss, R., Palmer, A., & Berthiaume, F. (2018). The Role of Macrophages in Acute  
926 and Chronic Wound Healing and Interventions to Promote Pro-wound Healing Phenotypes.  
927 *Front Physiol*, 9, 419. <https://doi.org/10.3389/fphys.2018.00419>
- 928 La Manno, G., Soldatov, R., Zeisel, A., Braun, E., Hochgerner, H., Petukhov, V., Lidschreiber, K.,  
929 Kastriiti, M. E., Lonnerberg, P., Furlan, A., Fan, J., Borm, L. E., Liu, Z., van Bruggen, D., Guo,  
930 J., He, X., Barker, R., Sundstrom, E., Castelo-Branco, G., Cramer, P., Adameyko, I.,  
931 Linnarsson, S., & Kharchenko, P. V. (2018). RNA velocity of single cells. *Nature*, 560(7719),  
932 494-498. <https://doi.org/10.1038/s41586-018-0414-6>
- 933 Landen, N. X., Li, D., & Stahle, M. (2016). Transition from inflammation to proliferation: a critical step  
934 during wound healing. *Cell Mol Life Sci*, 73(20), 3861-3885. [https://doi.org/10.1007/s00018-](https://doi.org/10.1007/s00018-016-2268-0)  
935 [016-2268-0](https://doi.org/10.1007/s00018-016-2268-0)
- 936 Lange, M., Bergen, V., Klein, M., Setty, M., Reuter, B., Bakhti, M., Lickert, H., Ansari, M., Schniering,  
937 J., Schiller, H. B., Pe'er, D., & Theis, F. J. (2022). CellRank for directed single-cell fate mapping.  
938 *Nat Methods*, 19(2), 159-170. <https://doi.org/10.1038/s41592-021-01346-6>
- 939 Langfelder, P., & Horvath, S. (2008). WGCNA: an R package for weighted correlation network analysis.  
940 *BMC Bioinformatics*, 9, 559. <https://doi.org/10.1186/1471-2105-9-559>
- 941 Li, X., Zhai, Y., Xi, B., Ma, W., Zhang, J., Ma, X., Miao, Y., Zhao, Y., Ning, W., Zhou, H., & Yang, C.  
942 (2021). Pinocembrin Ameliorates Skin Fibrosis via Inhibiting TGF-beta1 Signaling Pathway.  
943 *Biomolecules*, 11(8). <https://doi.org/10.3390/biom11081240>
- 944 Lindley, L. E., Stojadinovic, O., Pastar, I., & Tomic-Canic, M. (2016). Biology and Biomarkers for Wound  
945 Healing. *Plast Reconstr Surg*, 138(3 Suppl), 18S-28S.  
946 <https://doi.org/10.1097/PRS.0000000000002682>
- 947 Lloyd, K. L., & Kubes, P. (2006). GPI-linked endothelial CD14 contributes to the detection of LPS. *Am*  
948 *J Physiol Heart Circ Physiol*, 291(1), H473-481. <https://doi.org/10.1152/ajpheart.01234.2005>
- 949 Maloney, J., Keselman, A., Li, E., & Singer, S. M. (2015). Macrophages expressing arginase 1 and nitric  
950 oxide synthase 2 accumulate in the small intestine during *Giardia lamblia* infection. *Microbes*  
951 *Infect*, 17(6), 462-467. <https://doi.org/10.1016/j.micinf.2015.03.006>
- 952 Masson-Meyers, D. S., Andrade, T. A. M., Caetano, G. F., Guimaraes, F. R., Leite, M. N., Leite, S. N.,  
953 & Frade, M. A. C. (2020). Experimental models and methods for cutaneous wound healing  
954 assessment. *Int J Exp Pathol*, 101(1-2), 21-37. <https://doi.org/10.1111/iep.12346>

- 955 Mattila, J. T., Ojo, O. O., Kepka-Lenhardt, D., Marino, S., Kim, J. H., Eum, S. Y., Via, L. E., Barry, C. E.,  
956 3rd, Klein, E., Kirschner, D. E., Morris, S. M., Jr., Lin, P. L., & Flynn, J. L. (2013).  
957 Microenvironments in tuberculous granulomas are delineated by distinct populations of  
958 macrophage subsets and expression of nitric oxide synthase and arginase isoforms. *J*  
959 *Immunol*, *191*(2), 773-784. <https://doi.org/10.4049/jimmunol.1300113>
- 960 McInnes, L., Healy, J., & Melville, J. (2018). Umap: Uniform manifold approximation and projection for  
961 dimension reduction. *arXiv preprint arXiv:1802.03426*.
- 962 Meister, M., Tounsi, A., Gaffal, E., Bald, T., Papatriantafyllou, M., Ludwig, J., Pougialis, G., Bestvater,  
963 F., Klotz, L., Moldenhauer, G., Tuting, T., Hammerling, G. J., Arnold, B., & Oelert, T. (2015).  
964 Self-Antigen Presentation by Keratinocytes in the Inflamed Adult Skin Modulates T-Cell Auto-  
965 Reactivity. *J Invest Dermatol*, *135*(8), 1996-2004. <https://doi.org/10.1038/jid.2015.130>
- 966 Minutti, C. M., Knipper, J. A., Allen, J. E., & Zaiss, D. M. (2017). Tissue-specific contribution of  
967 macrophages to wound healing. *Semin Cell Dev Biol*, *61*, 3-11.  
968 <https://doi.org/10.1016/j.semcdb.2016.08.006>
- 969 Mizumoto, S., Janecke, A. R., Sadeghpour, A., Povysil, G., McDonald, M. T., Unger, S., Greber-Platzer,  
970 S., Deak, K. L., Katsanis, N., Superti-Furga, A., Sugahara, K., Davis, E. E., Yamada, S., &  
971 Vodopiutz, J. (2020). CSGALNACT1-congenital disorder of glycosylation: A mild skeletal  
972 dysplasia with advanced bone age. *Hum Mutat*, *41*(3), 655-667.  
973 <https://doi.org/10.1002/humu.23952>
- 974 Morimoto, H., Hida, Y., Maishi, N., Nishihara, H., Hatanaka, Y., Li, C., Matsuno, Y., Nakamura, T.,  
975 Hirano, S., & Hida, K. (2021). Biglycan, tumor endothelial cell secreting proteoglycan, as  
976 possible biomarker for lung cancer. *Thorac Cancer*, *12*(9), 1347-1357.  
977 <https://doi.org/10.1111/1759-7714.13907>
- 978 Munadzirah, E., Askandar, M. G., Yuliaty, A., Surboyo, M. D. C., & Wan Harun, W. H. A. (2022). The  
979 effect of secretory leukocyte protease inhibitor amnion membrane on incisional wound healing.  
980 *J Oral Biol Craniofac Res*, *12*(3), 358-362. <https://doi.org/10.1016/j.jobcr.2022.04.001>
- 981 Na, Y. R., Yoon, Y. N., Son, D. I., & Seok, S. H. (2013). Cyclooxygenase-2 inhibition blocks M2  
982 macrophage differentiation and suppresses metastasis in murine breast cancer model. *PLoS*  
983 *One*, *8*(5), e63451. <https://doi.org/10.1371/journal.pone.0063451>
- 984 Nunez, N., Derre-Bobillot, A., Trainel, N., Lakisic, G., Lecomte, A., Mercier-Nome, F., Cassard, A. M.,  
985 Bierne, H., Serron, P., & Archambaud, C. (2022). The unforeseen intracellular lifestyle of  
986 *Enterococcus faecalis* in hepatocytes. *Gut Microbes*, *14*(1), 2058851.  
987 <https://doi.org/10.1080/19490976.2022.2058851>
- 988 Olmsted, S. B., Dunny, G. M., Erlandsen, S. L., & Wells, C. L. (1994). A plasmid-encoded surface  
989 protein on *Enterococcus faecalis* augments its internalization by cultured intestinal epithelial  
990 cells. *J Infect Dis*, *170*(6), 1549-1556. <https://doi.org/10.1093/infdis/170.6.1549>
- 991 Orecchioni, M., Ghosheh, Y., Pramod, A. B., & Ley, K. (2019). Macrophage Polarization: Different Gene  
992 Signatures in M1(LPS+) vs. Classically and M2(LPS-) vs. Alternatively Activated Macrophages.  
993 *Front Immunol*, *10*, 1084. <https://doi.org/10.3389/fimmu.2019.01084>
- 994 Pakyari, M., Farrokhi, A., Maharlooei, M. K., & Ghahary, A. (2013). Critical Role of Transforming Growth  
995 Factor Beta in Different Phases of Wound Healing. *Adv Wound Care (New Rochelle)*, *2*(5), 215-  
996 224. <https://doi.org/10.1089/wound.2012.0406>
- 997 Perrault, D. P., Bramos, A., Xu, X., Shi, S., & Wong, A. K. (2018). Local Administration of Interleukin-1  
998 Receptor Antagonist Improves Diabetic Wound Healing. *Ann Plast Surg*, *80*(5S Suppl 5), S317-  
999 S321. <https://doi.org/10.1097/SAP.0000000000001417>
- 1000 Pfaffl, M. W., Tichopad, A., Prgomet, C., & Neuvians, T. P. (2004). Determination of stable  
1001 housekeeping genes, differentially regulated target genes and sample integrity: BestKeeper--  
1002 Excel-based tool using pair-wise correlations. *Biotechnol Lett*, *26*(6), 509-515.  
1003 <https://doi.org/10.1023/b:bile.0000019559.84305.47>
- 1004 Philippeos, C., Telerman, S. B., Oules, B., Pisco, A. O., Shaw, T. J., Elgueta, R., Lombardi, G., Driskell,  
1005 R. R., Soldin, M., Lynch, M. D., & Watt, F. M. (2018). Spatial and Single-Cell Transcriptional  
1006 Profiling Identifies Functionally Distinct Human Dermal Fibroblast Subpopulations. *J Invest*  
1007 *Dermatol*, *138*(4), 811-825. <https://doi.org/10.1016/j.jid.2018.01.016>
- 1008 Rashid, R., Nair, Z. J., Chia, D. M. H., Chong, K. K. L., Cazenave Gassiot, A., Morley, S. A., Allen, D.  
1009 K., Chen, S. L., Chng, S. S., Wenk, M. R., & Kline, K. A. (2023). Depleting Cationic Lipids  
1010 Involved in Antimicrobial Resistance Drives Adaptive Lipid Remodeling in *Enterococcus*  
1011 *faecalis*. *mBio*, *14*(1), e0307322. <https://doi.org/10.1128/mbio.03073-22>
- 1012 Recalcati, S., Gammella, E., Buratti, P., Doni, A., Anselmo, A., Locati, M., & Cairo, G. (2019).  
1013 Macrophage ferroportin is essential for stromal cell proliferation in wound healing.  
1014 *Haematologica*, *104*(1), 47-58. <https://doi.org/10.3324/haematol.2018.197517>

- 1015 Roca, C. P., Burton, O. T., Neumann, J., Tareen, S., Whyte, C. E., Gergelits, V., Veiga, R. V., Humblet-  
1016 Baron, S., & Liston, A. (2023). A cross entropy test allows quantitative statistical comparison of  
1017 t-SNE and UMAP representations. *Cell Rep Methods*, 3(1), 100390.  
1018 <https://doi.org/10.1016/j.crmeth.2022.100390>
- 1019 Rognoni, E., & Watt, F. M. (2018). Skin Cell Heterogeneity in Development, Wound Healing, and  
1020 Cancer. *Trends Cell Biol*, 28(9), 709-722. <https://doi.org/10.1016/j.tcb.2018.05.002>
- 1021 Sawant, K. V., Sepuru, K. M., Lowry, E., Penaranda, B., Frevert, C. W., Garofalo, R. P., & Rajarathnam,  
1022 K. (2021). Neutrophil recruitment by chemokines Cxcl1/KC and Cxcl2/MIP2: Role of Cxcr2  
1023 activation and glycosaminoglycan interactions. *J Leukoc Biol*, 109(4), 777-791.  
1024 <https://doi.org/10.1002/JLB.3A0820-207R>
- 1025 Schultz, G., Rotatori, D. S., & Clark, W. (1991). EGF and TGF-alpha in wound healing and repair. *J Cell*  
1026 *Biochem*, 45(4), 346-352. <https://doi.org/10.1002/jcb.240450407>
- 1027 Siriwach, R., Ngo, A. Q., Narumiya, S., & Thumkeo, D. (2022). An optimized protocol to identify  
1028 keratinocyte subpopulations in vitro by single-cell RNA sequencing analysis. *STAR Protoc*,  
1029 3(4), 101906. <https://doi.org/10.1016/j.xpro.2022.101906>
- 1030 Standal, T., Borset, M., & Sundan, A. (2004). Role of osteopontin in adhesion, migration, cell survival  
1031 and bone remodeling. *Exp Oncol*, 26(3), 179-184.  
1032 <https://www.ncbi.nlm.nih.gov/pubmed/15494684>
- 1033 Takaoka, R. T. C., Sertorio, N. D., Magalini, L. P. J., Dos Santos, L. M., Souza, H. R., Iyomasa-Pilon,  
1034 M. M., Possebon, L., Costa, S. S., & Girol, A. P. (2018). Expression profiles of Annexin A1,  
1035 formylated peptide receptors and cyclooxygenase-2 in gastroesophageal inflammations and  
1036 neoplasias. *Pathol Res Pract*, 214(2), 181-186. <https://doi.org/10.1016/j.prp.2017.12.003>
- 1037 Tamoutounour, S., Han, S. J., Deckers, J., Constantinides, M. G., Hurabielle, C., Harrison, O. J.,  
1038 Bouladoux, N., Linehan, J. L., Link, V. M., Vujkovic-Cvijin, I., Perez-Chaparro, P. J., Rosshart,  
1039 S. P., Rehmann, B., Lazarevic, V., & Belkaid, Y. (2019). Keratinocyte-intrinsic MHCII  
1040 expression controls microbiota-induced Th1 cell responses. *Proc Natl Acad Sci U S A*, 116(47),  
1041 23643-23652. <https://doi.org/10.1073/pnas.1912432116>
- 1042 Tan, C. A. Z., Lam, L. N., Biukovic, G., Soh, E. Y., Toh, X. W., Lemos, J. A., & Kline, K. A. (2022).  
1043 *Enterococcus faecalis* Antagonizes *Pseudomonas aeruginosa* Growth in Mixed-Species  
1044 Interactions. *J Bacteriol*, 204(7), e0061521. <https://doi.org/10.1128/jb.00615-21>
- 1045 Theocharidis, G., Rahmani, S., Lee, S., Li, Z., Lobao, A., Kounas, K., Katopodi, X. L., Wang, P., Moon,  
1046 S., Vlachos, I. S., Niewczasz, M., Mooney, D., & Veves, A. (2022). Murine macrophages or their  
1047 secretome delivered in alginate dressings enhance impaired wound healing in diabetic mice.  
1048 *Biomaterials*, 288, 121692. <https://doi.org/10.1016/j.biomaterials.2022.121692>
- 1049 Tien, B. Y. Q., Goh, H. M. S., Chong, K. K. L., Bhaduri-Tagore, S., Holec, S., Dress, R., Ginhoux, F.,  
1050 Ingersoll, M. A., Williams, R. B. H., & Kline, K. A. (2017). *Enterococcus faecalis* Promotes Innate  
1051 Immune Suppression and Polymicrobial Catheter-Associated Urinary Tract Infection. *Infect*  
1052 *Immun*, 85(12). <https://doi.org/10.1128/IAI.00378-17>
- 1053 Toda, G., Yamauchi, T., Kadowaki, T., & Ueki, K. (2021). Preparation and culture of bone marrow-  
1054 derived macrophages from mice for functional analysis. *STAR Protoc*, 2(1), 100246.  
1055 <https://doi.org/10.1016/j.xpro.2020.100246>
- 1056 Vecchi, L., Alves Pereira Zoia, M., Goss Santos, T., de Oliveira Beserra, A., Colaco Ramos, C. M.,  
1057 Franca Matias Colombo, B., Paiva Maia, Y. C., Piana de Andrade, V., Teixeira Soares Mota,  
1058 S., Goncalves de Araujo, T., Van Petten de Vasconcelos Azevedo, F., Soares, F. A., Oliani, S.  
1059 M., & Goulart, L. R. (2018). Inhibition of the AnxA1/FPR1 autocrine axis reduces MDA-MB-231  
1060 breast cancer cell growth and aggressiveness in vitro and in vivo. *Biochim Biophys Acta Mol*  
1061 *Cell Res*, 1865(9), 1368-1382. <https://doi.org/10.1016/j.bbamcr.2018.06.010>
- 1062 Veglia, F., Sanseviero, E., & Gabrilovich, D. I. (2021). Myeloid-derived suppressor cells in the era of  
1063 increasing myeloid cell diversity. *Nat Rev Immunol*, 21(8), 485-498.  
1064 <https://doi.org/10.1038/s41577-020-00490-y>
- 1065 Vu, R., Jin, S., Sun, P., Haensel, D., Nguyen, Q. H., Dragan, M., Kessenbrock, K., Nie, Q., & Dai, X.  
1066 (2022). Wound healing in aged skin exhibits systems-level alterations in cellular composition  
1067 and cell-cell communication. *Cell Rep*, 40(5), 111155.  
1068 <https://doi.org/10.1016/j.celrep.2022.111155>
- 1069 Wang, M., Chaudhuri, R., Ong, W. W. S., & Sintim, H. O. (2021). c-di-GMP Induces COX-2 Expression  
1070 in Macrophages in a STING-Independent Manner. *ACS Chem Biol*, 16(9), 1663-1670.  
1071 <https://doi.org/10.1021/acscchembio.1c00342>
- 1072 Wang, P. H., Huang, B. S., Horng, H. C., Yeh, C. C., & Chen, Y. J. (2018). Wound healing. *J Chin Med*  
1073 *Assoc*, 81(2), 94-101. <https://doi.org/10.1016/j.jcma.2017.11.002>

- 1074 Watanabe, S., Alexander, M., Misharin, A. V., & Budinger, G. R. S. (2019). The role of macrophages in  
1075 the resolution of inflammation. *J Clin Invest*, 129(7), 2619-2628.  
1076 <https://doi.org/10.1172/JCI124615>
- 1077 Wells, C. L., Jechorek, R. P., & Erlandsen, S. L. (1990). Evidence for the translocation of *Enterococcus*  
1078 *faecalis* across the mouse intestinal tract. *J Infect Dis*, 162(1), 82-90.  
1079 <https://doi.org/10.1093/infdis/162.1.82>
- 1080 Wells, C. L., Jechorek, R. P., Maddaus, M. A., & Simmons, R. L. (1988). Effects of clindamycin and  
1081 metronidazole on the intestinal colonization and translocation of enterococci in mice. *Antimicrob*  
1082 *Agents Chemother*, 32(12), 1769-1775. <https://doi.org/10.1128/AAC.32.12.1769>
- 1083 Wilkinson, H. N., & Hardman, M. J. (2020). Wound healing: cellular mechanisms and pathological  
1084 outcomes. *Open Biol*, 10(9), 200223. <https://doi.org/10.1098/rsob.200223>
- 1085 Xie, Y., Gao, K., Hakkinen, L., & Larjava, H. S. (2009). Mice lacking beta6 integrin in skin show  
1086 accelerated wound repair in dexamethasone impaired wound healing model. *Wound Repair*  
1087 *Regen*, 17(3), 326-339. <https://doi.org/10.1111/j.1524-475X.2009.00480.x>
- 1088 Yang, Y. H., Aeberli, D., Dacumos, A., Xue, J. R., & Morand, E. F. (2009). Annexin-1 regulates  
1089 macrophage IL-6 and TNF via glucocorticoid-induced leucine zipper. *J Immunol*, 183(2), 1435-  
1090 1445. <https://doi.org/10.4049/jimmunol.0804000>
- 1091 Zappia, L., & Oshlack, A. (2018). Clustering trees: a visualization for evaluating clusterings at multiple  
1092 resolutions. *Gigascience*, 7(7). <https://doi.org/10.1093/gigascience/giy083>
- 1093 Zhao, L., Wang, W., Niu, P., Luan, X., Zhao, D., & Chen, Y. (2022). The molecular mechanisms of  
1094 CTHRC1 in gastric cancer by integrating TCGA, GEO and GSA datasets. *Front Genet*, 13,  
1095 900124. <https://doi.org/10.3389/fgene.2022.900124>
- 1096 Zou, J., & Shankar, N. (2014). *Enterococcus faecalis* infection activates phosphatidylinositol 3-kinase  
1097 signaling to block apoptotic cell death in macrophages. *Infect Immun*, 82(12), 5132-5142.  
1098 <https://doi.org/10.1128/IAI.02426-14>
- 1099 Zou, J., & Shankar, N. (2016). The opportunistic pathogen *Enterococcus faecalis* resists phagosome  
1100 acidification and autophagy to promote intracellular survival in macrophages. *Cell Microbiol*,  
1101 18(6), 831-843. <https://doi.org/10.1111/cmi.12556>
- 1102
- 1103



1104 **FIGURE LEGENDS**

1105

1106 **Figure 1. Mouse skin wound infection atlas.**

1107 **(A)** Gene expression of healing markers *Pdgfa*, *Tgfb1* and *Egf* four days post-infection (4 dpi) for  
1108 uninfected and *E. faecalis*-infected 6–7-week-old C57BL/6J mouse skin wounds, normalized to intact  
1109 skin ( $n = 6$  for skin;  $n = 8$  for wounds; one-way ANOVA). **(B)** Single-cell RNA sequencing workflow of  
1110 full-thickness mouse wounds. **(C)** Integrated dataset of ~23,000 scRNA-seq libraries from uninfected  
1111 and infected wounds identifies 5 mega cell classes indicated in the UMAP. **(D)** UMAP colored by the  
1112 uninfected and infected conditions. **(E)** Schematic describing the color-matched cell types with that of  
1113 the clusters in Figure S1F. **(F)** Dot plot depicting the top two cell type-specific markers in the integrated  
1114 data. Legend indicates average expression and dot size represents percent expression. **(G)** Density  
1115 plots depict cell types described in C. **(H)** Heat map of weighted gene co-expression network analysis  
1116 for annotated cell populations, colored by bars matching mega clusters and annotated cell types in C.

1117

1118 **Figure 2. Sub-clustering of keratinocyte populations reveals infection-specific cell types.**

1119 **(A)** UMAP of integrated keratinocyte (basal, suprabasal, hair follicle, bulge, and sebaceous gland)  
1120 population reveals 19 clusters. **(B)** Infected keratinocytes (green) show unique and shared clusters with  
1121 uninfected keratinocytes (purple). **(C)** Spatial dispersion of *Krt5* and *Krt10* abundance in keratinocytes.  
1122 **(D)** Expression of *Lgr5*, *Ivl*, *Lor*, and *Krt15* in Louvain clusters shown in A. **(E)** Heat map of top 5  
1123 differentially expressed marker genes for each cluster in keratinocytes. Rectangle boxes indicate  
1124 infection-specific Louvain clusters. **(F-G)** The bar plots show the top 15 Gene Ontology terms for  
1125 infection-specific (F) *Zeb2<sup>hi</sup>* (cluster 0) and (G) *Gjb6<sup>hi</sup>* (cluster 6) keratinocyte populations. **(H-I)** Dynamic  
1126 RNA velocity estimation of uninfected (H) and infected (I) keratinocytes. **(J)** The top lineage driver gene,  
1127 *Rgs1*, in infected keratinocytes, was ubiquitously expressed in infection-specific Louvain clusters. (K)  
1128 Gene expression dynamics resolved along latent time in the top 50 likelihood-ranked genes of infected  
1129 keratinocytes. The colored bar at the top indicates Louvain clusters in I. Legend describes scaled gene  
1130 expression. (L) Inferred ligand-receptor pairs outgoing from infected keratinocytes. (M) The hierarchy  
1131 tree depicts the trajectory of differentiating and terminally differentiated keratinocyte cells originating  
1132 from basal keratinocytes.

1133

1134 **Figure 3. *E. faecalis* delays immune response in fibroblasts.**

1135 **(A)** UMAP of integrated fibroblasts reveals 12 clusters. **(B)** Infected fibroblasts (green) show unique  
1136 and shared clusters with uninfected fibroblasts (purple). **(C)** Spatial dispersion of *Col1a1* and *Col1a2*  
1137 abundance in fibroblasts. **(D)** Expression of *Eln*, *Aspn*, *Pdgfrb* and *Fap* in Louvain clusters shown in A.  
1138 **(E)** Heat map of top 5 differentially expressed marker genes for each cluster in fibroblasts. Rectangle  
1139 boxes indicate infection-specific Louvain clusters. **(F-G)** The bar plots show the top 15 Gene Ontology  
1140 terms for infection-specific (F) *Lyz2<sup>hi</sup>/Tagln<sup>hi</sup>* (cluster 0) and (G) *Timp1<sup>hi</sup>* (cluster 2) fibroblast  
1141 populations. **(H-I)** Dynamic RNA velocity estimation of uninfected (H) and infected (I) fibroblasts. **(J)**  
1142 The top lineage driver gene, *Csgalnac1*, expression in infected fibroblasts. **(K)** Gene expression  
1143 dynamics resolved along latent time in the top 50 likelihood-ranked genes of infected fibroblasts. The  
1144 colored bar at the top indicates Louvain clusters in I. Legend describes scaled gene expression. **(L)**  
1145 While uninfected fibroblasts show healing phenotypes, infected fibroblasts undergo two transitioning  
1146 phases: (i) contractile and (ii) pathologic.

1147  
1148 **Figure 4. Macrophages display M2-like polarization.**

1149 **(A)** UMAP of the integrated myeloid population reveals 9 macrophages, 2 dendritic cells, and one  
1150 Langerhans cell cluster. **(B)** Infected myeloid (green) population show unique and shared clusters with  
1151 the uninfected myeloid (purple) population. **(C)** Spatial distribution of *Lyz2* (macrophage) and *Itgax* (DC  
1152 and LC) abundance in fibroblasts. **(D)** Gene expression *Mrc1*, *Nos2* and *Arg1* in mouse wounds at 4dpi,  
1153 normalized to homeostatic skin ( $n = 6$  for skin;  $n = 8$  for wounds; one-way ANOVA). **(E)** *In vitro* infection  
1154 of unpolarized (M0) bone marrow-derived murine macrophages (BMDMs) resulted in a down-regulation  
1155 of TRM-associated marker *Mrc1* and an upregulation of M2-like markers *Nos2* and *Arg1*. Data are  
1156 pooled from 2 biological replicates (shown in light and dark circles respectively) of 3 technical replicates  
1157 each. **(F)** Spatial distribution of TRM and M2-like macrophage markers, *Mrc1* and *Arg1*, respectively.  
1158 **(G)** Expression of *Mrc1*, *Adgre1*, *Arg1*, *Itgax*, *Cd207* and *Nos2* in the integrated myeloid dataset. **(H-I)**  
1159 Dynamic RNA velocity estimation of uninfected (H) and infected (I) myeloid cells. **(J)** The top lineage  
1160 driver gene, *Fth1*, was ubiquitously expressed in terminal macrophage populations. **(K)** Putative driver  
1161 genes of infected macrophages. **(L)** The proposed model describes macrophage characteristics, where  
1162 neutrophil-attracting and wound repair-associated macrophages were involved in uninfected wound  
1163 healing. In contrast, bacteria-infected wounds are enriched in efferocytotic macrophages and matrix-  
1164 producing macrophages.

1165 **Figure 5. Crosstalk between neutrophils and anti-inflammatory macrophages regulates the CCL**  
1166 **signaling pathway.**

1167 **(A)** UMAP of the integrated myeloid population reveals 6 Louvain clusters. **(B)** The infected neutrophil  
1168 (green) population shows unique and shared clusters with the uninfected neutrophil (purple) population.  
1169 **(C)** Spatial organization of *Csf3r* and *Itgam* abundance in neutrophils. **(D)** Expression of *Cxcr2*, *Fcgr3*,  
1170 *Fth1* and *Camk1d* in Louvain clusters. **(E)** Heat map of top 5 differentially expressed marker genes in  
1171 neutrophils. Rectangle boxes indicate infection-specific Louvain clusters. **(F-G)** The bar plots show the  
1172 top 15 Gene Ontology terms for infection-specific (F) *Lrg1<sup>hi</sup>* (cluster 0) and **(G)** *Csf1<sup>hi</sup>* (cluster 2)  
1173 populations. **(H)** Dynamic RNA velocity estimation of infected neutrophils. **(I)** The top lineage driver  
1174 gene, *Entpd1*, was ubiquitously expressed in *Lrg1<sup>hi</sup>* neutrophils (cluster 0). **(J)** Putative driver genes of  
1175 infected neutrophil clusters. **(K)** Cytokine signaling pathway (CCL) cell-cell interaction map. **(L)** Gene  
1176 expression of cytokines *Ccl3*, *Ccl4*, and *Ccl6* in neutrophils. **(M)** Ccl3:Ccr1 ligand-receptor interaction  
1177 mediate neutrophil-macrophage crosstalk.

1178

1179 **Figure 6. Macrophage-EC interactions display an anti-inflammatory niche.**

1180 **(A)** UMAP of integrated endothelial cells reveals 13 clusters. **(B)** Infected endothelial cells (green) show  
1181 unique and shared clusters with uninfected endothelial cells (purple). **(C-D)** Gene Ontology analysis of  
1182 infection-specific clusters 0 (C) and 8 (D). **(E)** Dynamic RNA velocity estimation of infected endothelial  
1183 cells. **(F)** The top lineage driver genes, *Malat1*, *Tcf4*, *Plcb1*, *Diaph2*, *Bmpr2*, and *Adamts9* in infected  
1184 endothelial cells. **(G)** NicheNet interaction heat map between keratinocytes, fibroblasts, macrophages,  
1185 and endothelial cells. Note the macrophage *Il1b*-specific *Bgn* induction in infected ECs. **(H)** The dot plot  
1186 depicts interactions between endothelial cells (receptors) and keratinocytes, fibroblasts, and  
1187 macrophages (ligands). Rows demonstrate a ligand-receptor pair for the indicated cell-cell interactions  
1188 (column). **(I)** Differential interaction strengths of a cellular interactome for TNF, SPP1 and CXCL  
1189 signaling pathways between all cell types in infection. **(J)** Spp1, Cxcl2, and Cxcl3 gene expression in  
1190 keratinocytes, M2-like macrophages, and fibroblasts (Wilcoxon Rank Sum test, \*\*\*\* $p < 0.0001$ ).

## Supplemental information

### Decoding the complexity of delayed wound healing following *Enterococcus faecalis* infection

Cenk CELIK, Stella Yue Ting LEE, Frederick Reinhart TANOTO, Mark VELEBA, Kimberly A. KLINE, Guillaume THIBAUT

## SUPPLEMENTAL FIGURES

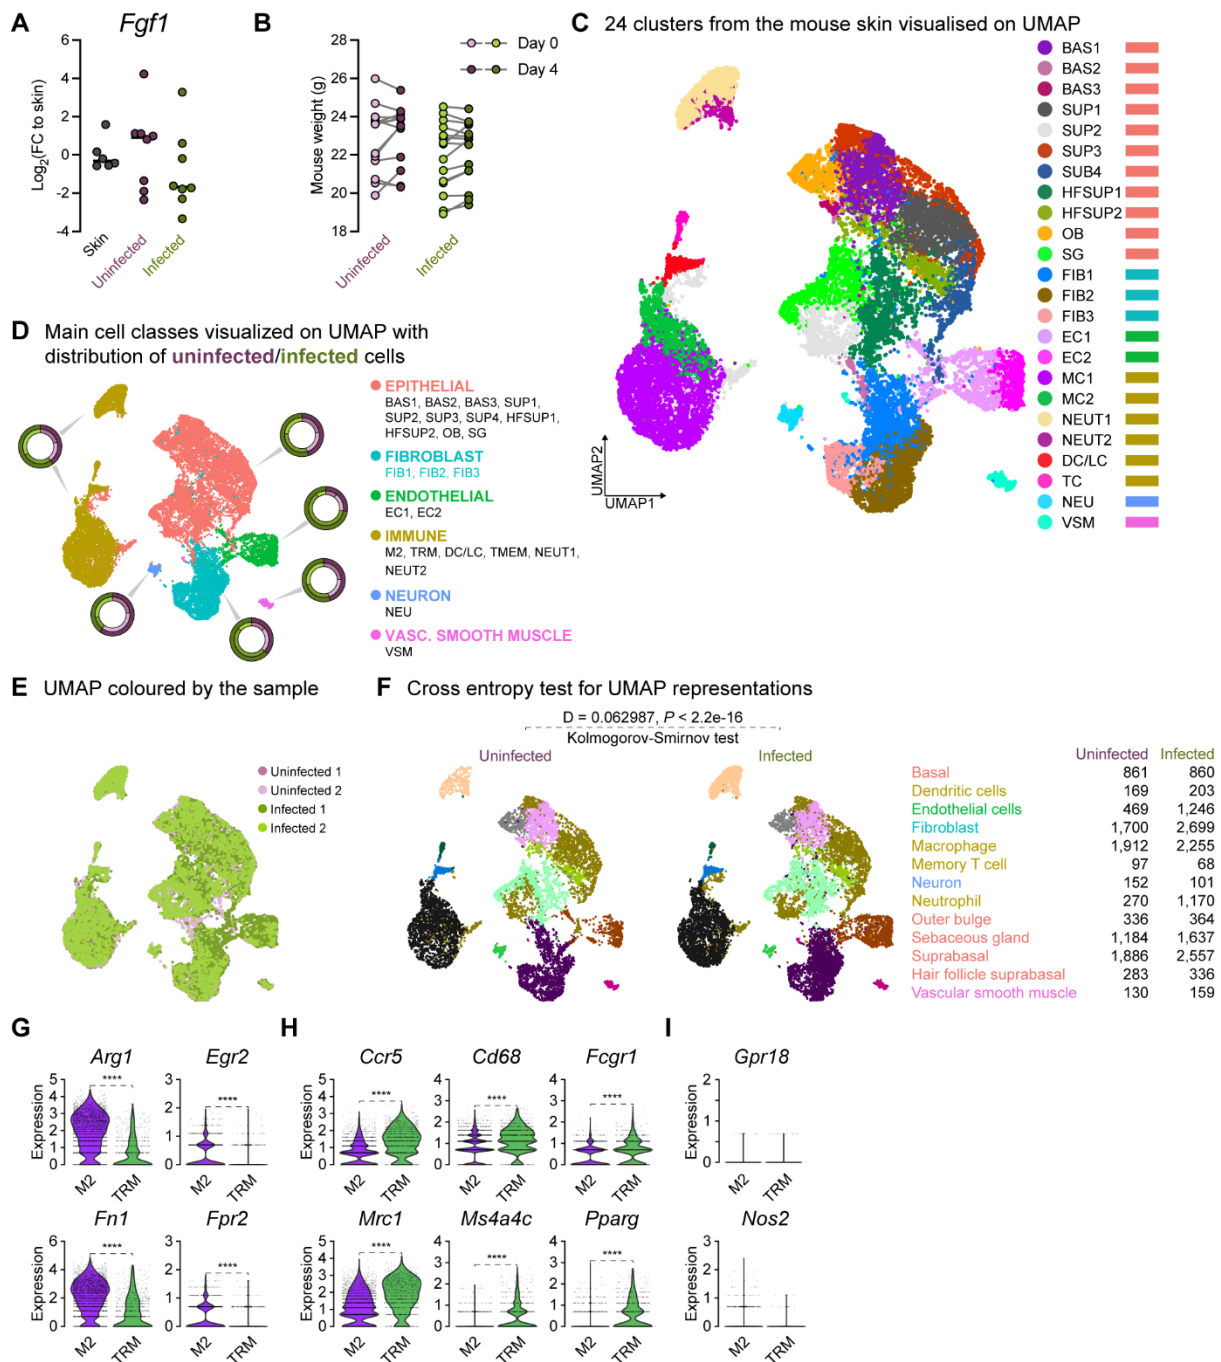

**Figure S1. Comparison of 4dpi characteristics between uninfected and *E. faecalis* infected *in vivo* and scRNA-seq data.**

(A) Gene expression of fibroblast growth factor 1 (*Fgf1*) four days post-infection (4dpi) for uninfected and *E. faecalis*-infected 6–7-week-old C57BL/6J mouse skin wounds, normalized to homeostatic skin ( $n = 6$  for skin;  $n = 8$  for wounds; one-way ANOVA). (B) Weight of mice from wounding (Day 0) until 4 dpi. (C–D) Integrated Louvain clustering of ~23,000 scRNA-seq libraries from uninfected and infected wounds identifies 24 clusters (C) in 5 mega clusters (D), where colored circles show the contribution to the individual clusters for each condition. (E) UMAP colored by the sample, where shades of purple and green represent uninfected and infected conditions, respectively. (F) Cross entropy test for UMAP representations of uninfected and infected single-cell datasets ( $P$  value  $< 2.2 \times 10^{-16}$ , two-sided Kolmogorov-Smirnov test). (G–I) Comparisons of M2-like macrophage polarization (M2) markers *Arg1*, *Egr2*, *Fn1* and *Fpr2* (G), tissue-resident macrophage (TRM) markers *Ccr5*, *Cd68*, *Fcgr1*, *Mrc1* (*Cd206*),

*Ms4a4c*, and *Pparg* (H), and M1-like macrophage polarization markers *Grp18* and *Nos2* (*iNos*) between the two annotated macrophage clusters (I). Wilcoxon Rank Sum test, \*\*\*\* $p < 0.0001$ .



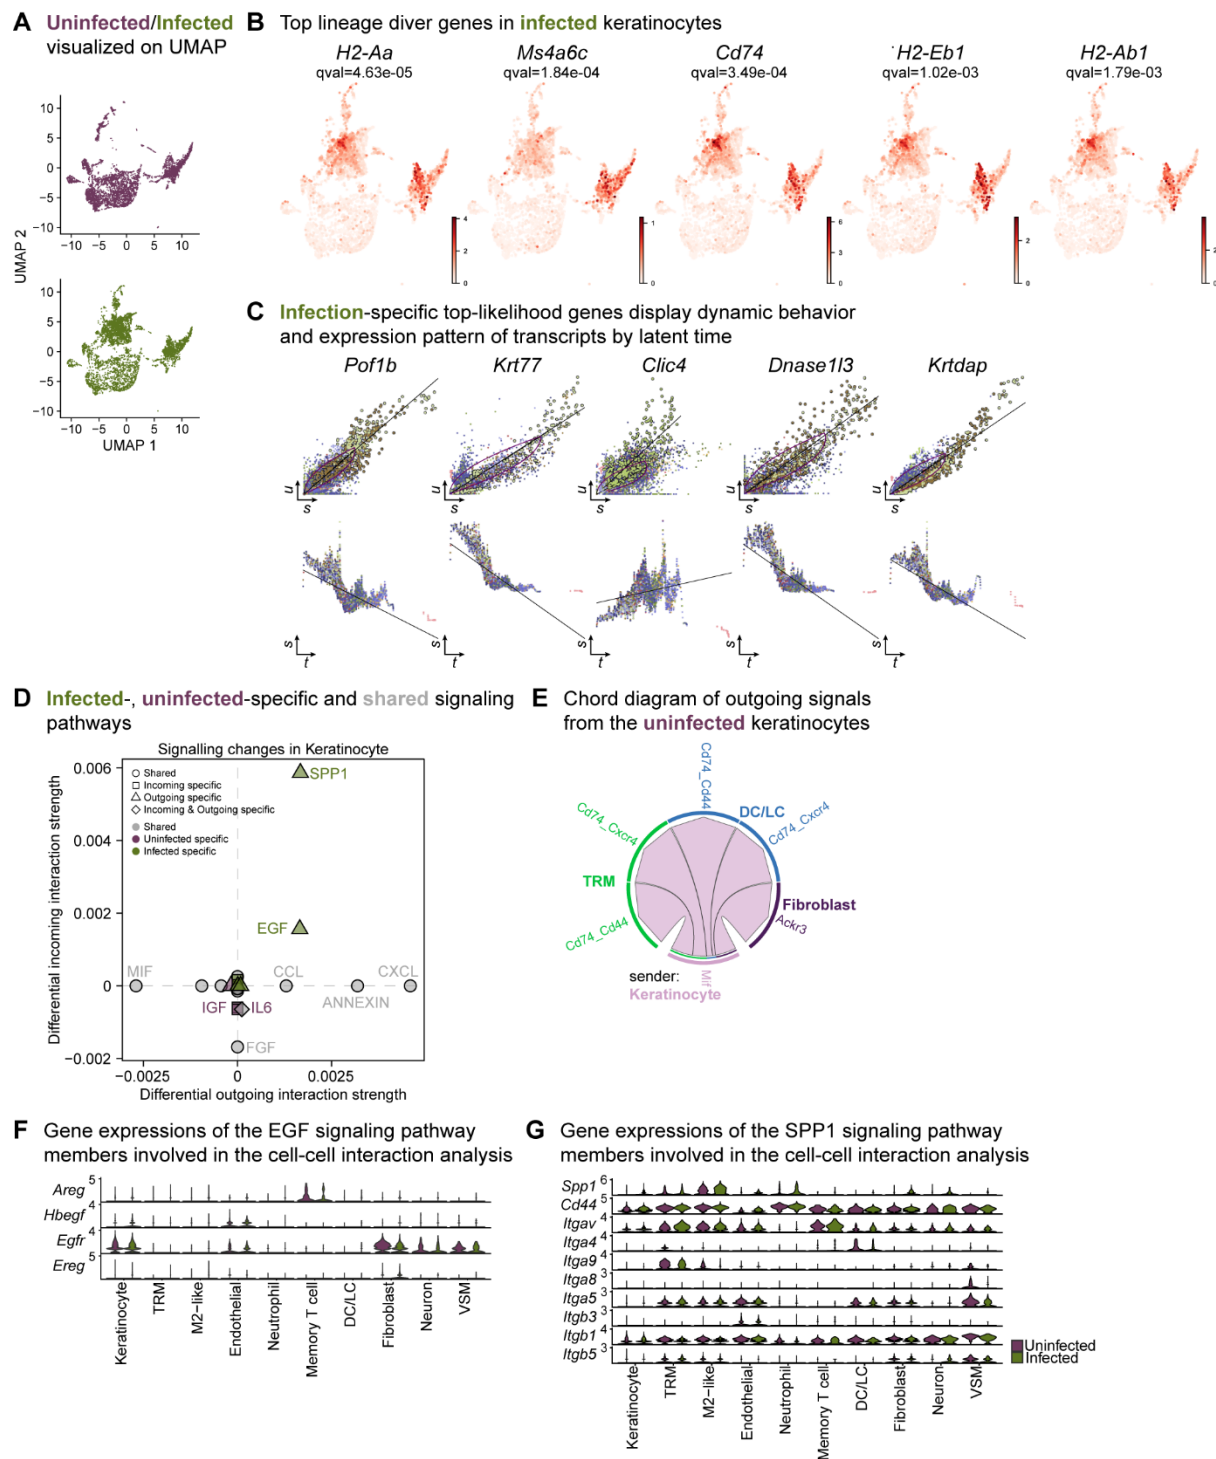

**Figure S2. Infection-specific keratinocytes display differential transcriptome.**

(A) UMAP representations of the extended analysis of keratinocytes from uninfected and infected wounds. (B) The lineage driver genes, *H2-Aa*, *Ms4a6c*, *Cd74*, *H2-Eb1* and *H2-Ab1* in infected keratinocytes were ubiquitously expressed in infection-specific Louvain clusters. (C) Infection-specific top-likelihood genes display dynamic behavior (top row) and expression pattern of transcripts by latent time (bottom row). Axes denote *u* for unspliced; *s* for spliced; *t* for latent time. (D) Infected- (green), uninfected-specific (purple) and shared (grey) signaling pathways in keratinocytes inferred from CellChat. (E) Chord diagram of outgoing signals from the uninfected keratinocyte population. (F-G) Gene expression of the EGF (F) and SPP1 (G) signaling pathway members involved in the cell-cell interaction analysis.

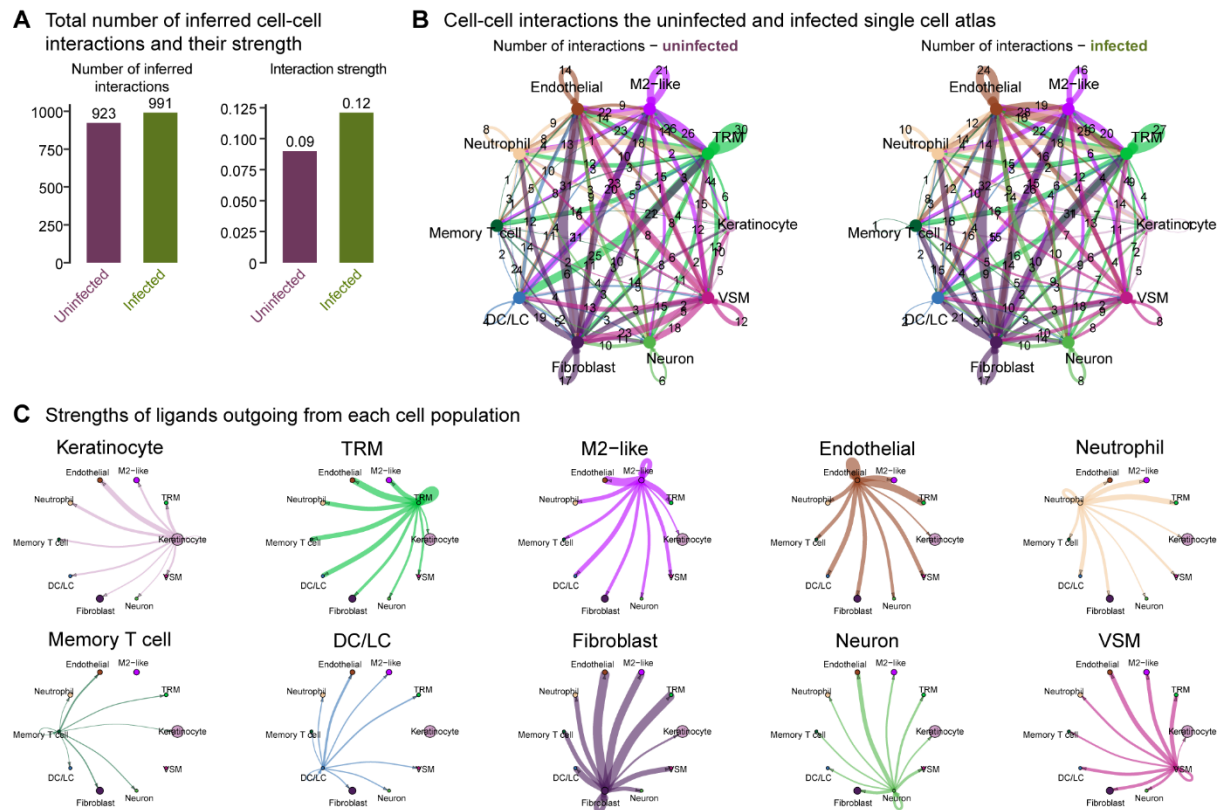

**Figure S3. Overall cellular interactome of scRNA-seq atlas.**

(A) Total number of inferred cell-cell interactions and their strength computed by CellChat. (B) A map of cell-cell interactions in the uninfected and infected single-cell atlas, indicating the number of interactions outgoing at each node. (C) The strengths of ligands outgoing from each cell population.

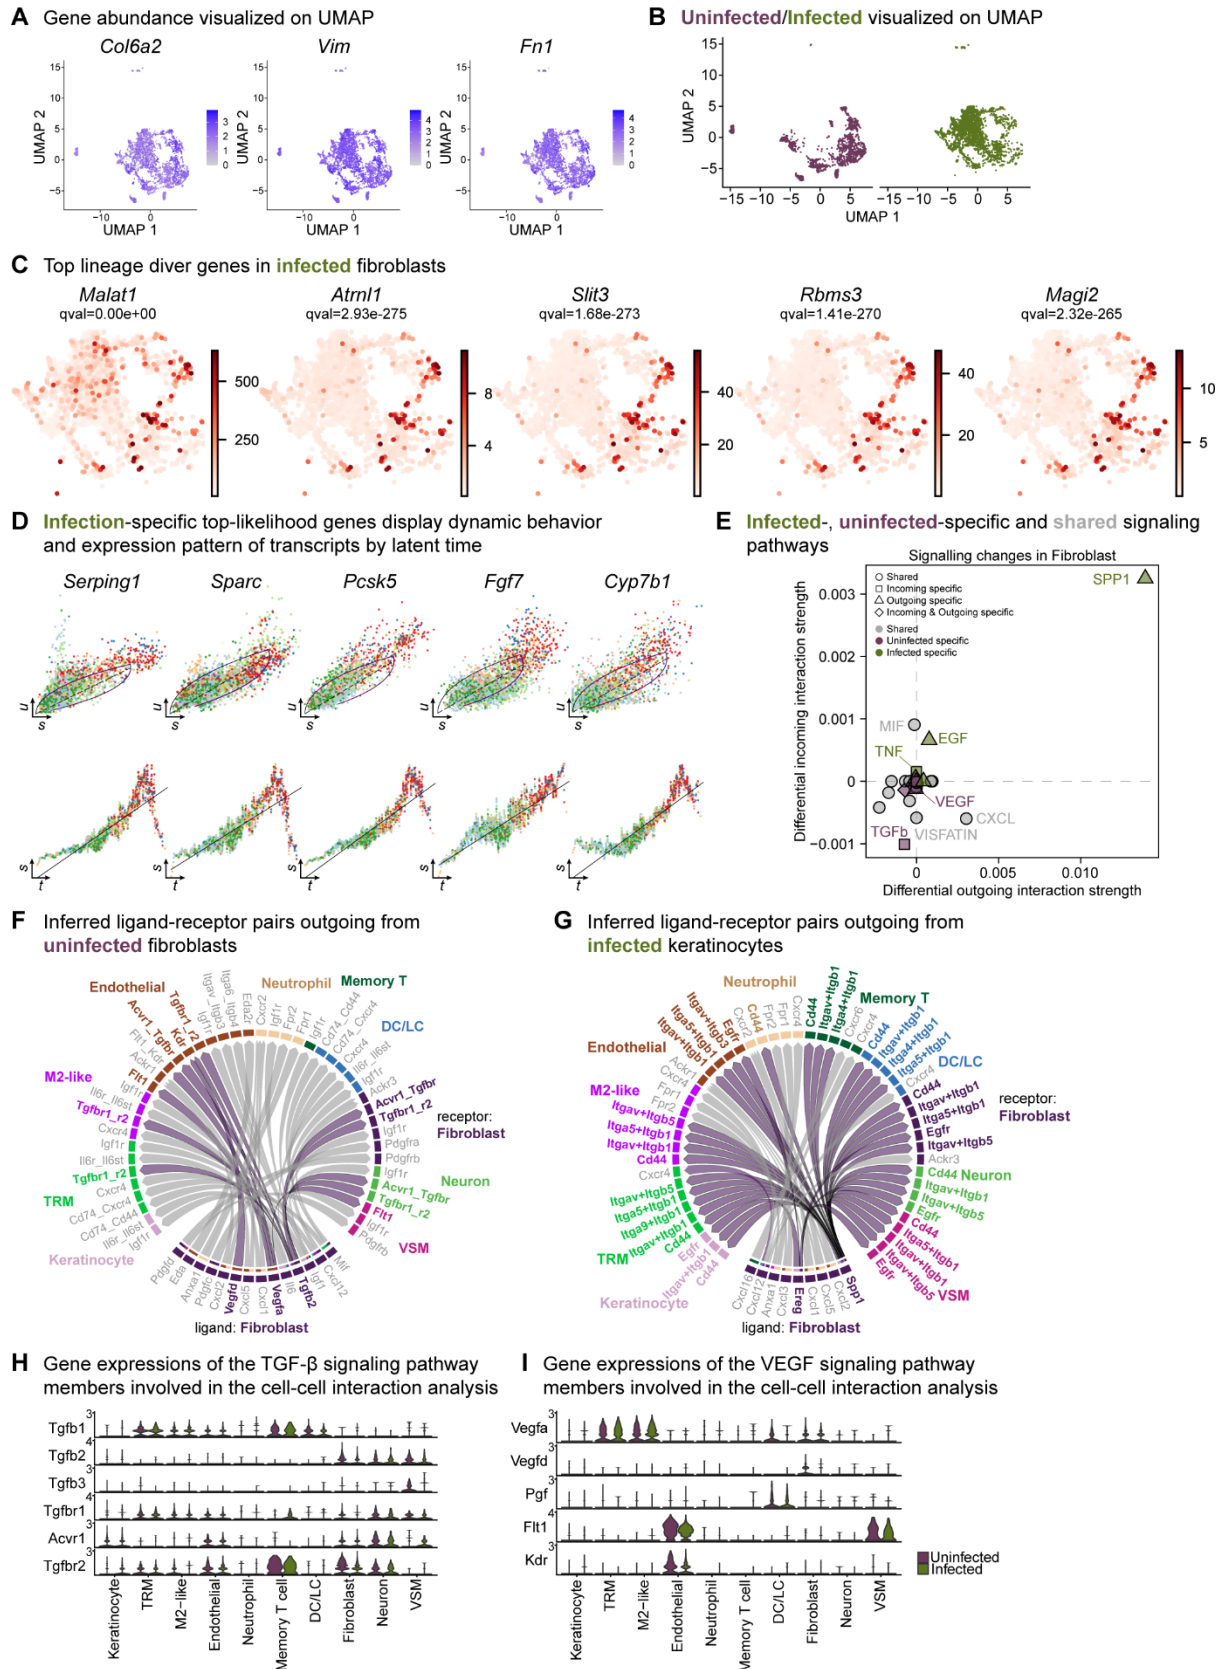

**Figure S4. Extended analysis of the fibroblast population reveals unique signatures.**

(A) Spatial dispersion of fibroblast markers *Col6a2*, *Vim*, and *Fn1* in the extended analysis integrated data. (B) Extended analysis of fibroblasts displays infection- and healing-specific clusters. (C) The lineage driver genes *Malat1*, *Atrn1*, *Slit3*, *Rbms3*, and *Magi2* were predominantly expressed in infected fibroblasts. (D) Infection-specific top-likelihood genes display dynamic behavior (top row) and

expression pattern of transcripts by latent time (bottom row). Axes denote  $u$  for unspliced;  $s$  for spliced;  $t$  for latent time. **(E)** Infected- (green), uninfected-specific (purple) and shared (grey) signaling pathways in fibroblasts inferred from CellChat. **(F-G)** Chord diagram of ligand-receptor pairs in the uninfected (F) and infected (G) fibroblasts. **(I)** Inferred ligand-receptor pairs outgoing from infected fibroblasts **(H-I)** Gene expression of the TGF- $\beta$  (F) and VEGF (G) signaling pathway members involved in the cell-cell interaction analysis.

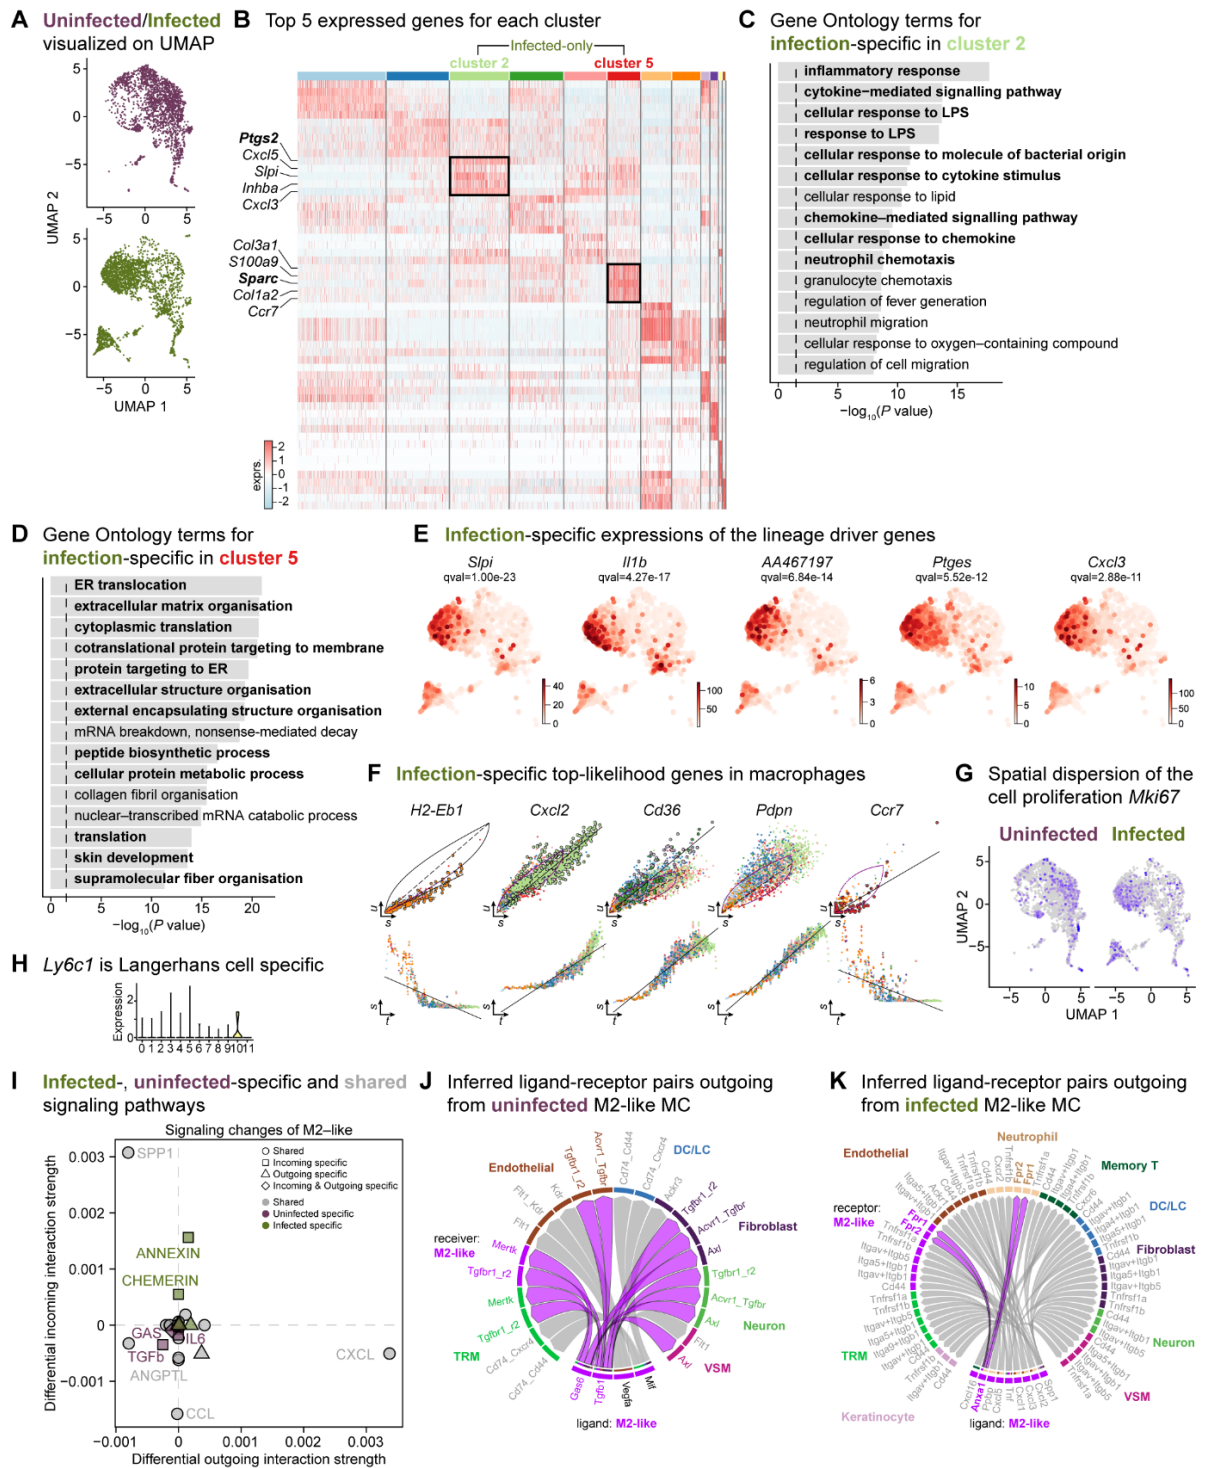

**Figure S5. The mega myeloid cell population displays M2-like polarization signatures.**

(A) Split UMAP representations of the uninfected and infected myeloid cells. (B) Heat map of top 5 differentially expressed marker genes in macrophages. Rectangle boxes indicate infection-specific Louvain clusters. (C-D) The bar plots show the top 15 Gene Ontology terms for infection-specific *Ptgs2*<sup>+</sup> (cluster 2) (C) and *Sparc*<sup>+</sup> (cluster 5) macrophages (D). (E) Infection-specific expression of the lineage driver genes *Sipi*, *Il1b*, *AA467197*, *Ptges*, and *Cxcl3* indicate delayed inflammation. (F) Infection-specific top-likelihood genes, *Cxcl2*, *Cd36*, and *Pdpn*, were activated, while *H2-Eb1* and *Ccr7* were consumed in macrophages. (G) Spatial dispersion of the cell proliferation marker (*Mki67*). (H) Expression of *Ly6c1* was Langerhans cell-specific. (I) Infected- (green), uninfected-specific (purple), and shared (grey) signaling pathways in M2-like macrophages. (J) Chord diagram of ligand-receptor pairs in the uninfected M2-like macrophages. (K) Inferred ligand-receptor pairs outgoing from infected M2-like macrophages.



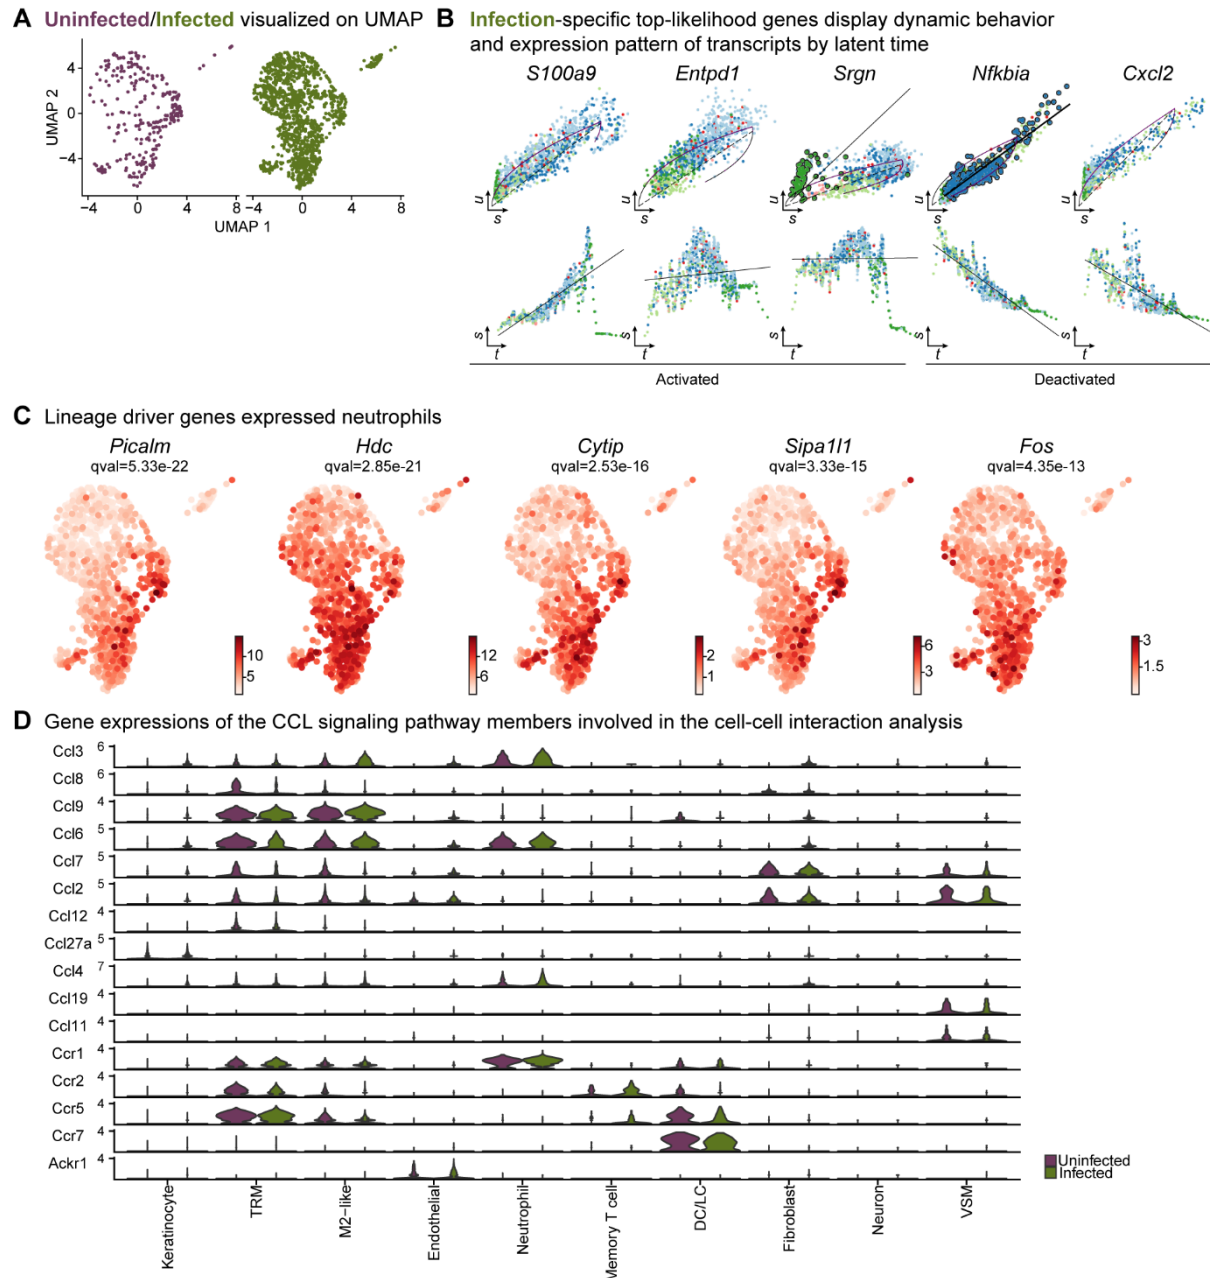

**Figure S6. Neutrophil infiltration was enhanced in response to *E. faecalis* infection.**

(A) UMAP representations of the extended analysis of neutrophil populations in each condition. (B) Infection-specific top-likelihood genes display dynamic behavior (top row) and expression pattern of transcripts by latent time (bottom row). (C) Lineage driver genes *Picalm*, *Hdc*, *Cytip*, *Sipa111*, and *Fos* were highly expressed in *Lrg1<sup>hi</sup>* neutrophils. (D) Gene expression of the CCL signaling pathway members involved in the cell-cell interaction analysis.



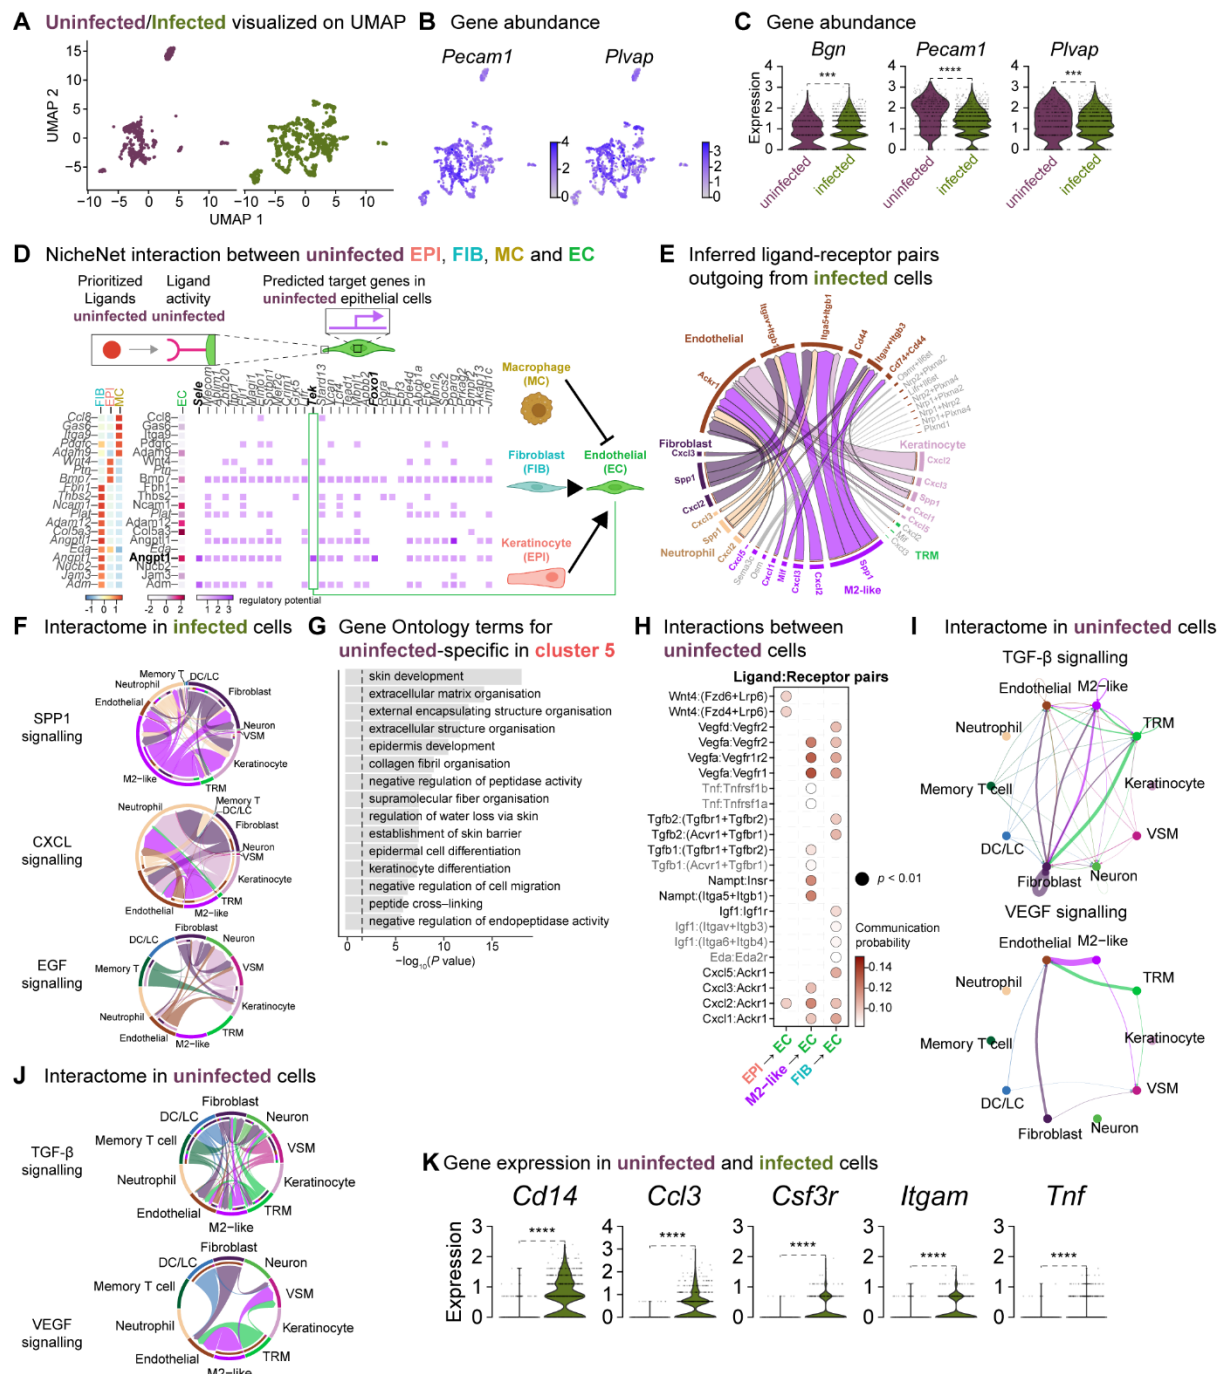

**Figure S7. Fibroblasts orchestrate a reparative niche in the uninfected wounds.**

(A) UMAP representations of the uninfected and infected endothelial subsets. (B) Spatial dispersion of endothelial cell signatures *Pecam1* and *Plvap*. (C) Expressions of *Bgn*, *Pecam1*, and *Plvap* in endothelial cells (Wilcoxon Rank Sum test, \*\*\*\*  $P < 0.0001$ , \*\*\*  $P < 0.001$ ). (D) NicheNet interaction heat map between keratinocytes, fibroblasts, macrophages, and endothelial cells. Note the specific pairing of the fibroblast ligand angiopoietin 1 (*Angpt1*) with the TEK tyrosine receptor (*Tek*) in the uninfected niche. (E) Chord diagram of the cellular interactome between keratinocytes, fibroblasts, macrophages, and endothelial cells from infected populations. (F) Chord diagrams of the cellular interactome for TNF, SPP1 and CXCL signaling pathways across all cell types in infection. (G) Gene Ontology analysis of the uninfected specific ECs. (H) Dot plot of ligand:receptor pairs in the healing niche. (I) Differential interaction strengths of the cellular interactome for TGF- $\beta$  and VEGF signaling pathways in the unwounded niche. (J) Chord diagrams of the cellular interactome for TGF- $\beta$  and VEGF signaling pathways in the uninfected niche. (K) Infection-specific expression of *Cd14*, *Ccl3*, *Csf3r*, *Itgam*, and *Tnf* in endothelial cells (Wilcoxon Rank Sum test, \*\*\*\*  $P < 0.0001$ ).

### A Healing markers in mouse wounds at 4 dpi

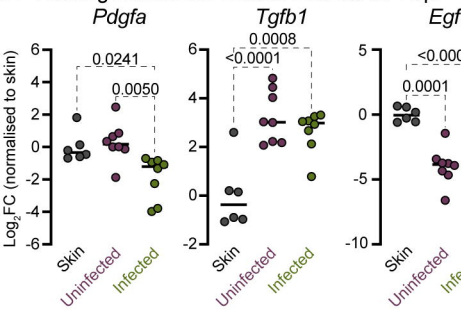

### B Experimental approach

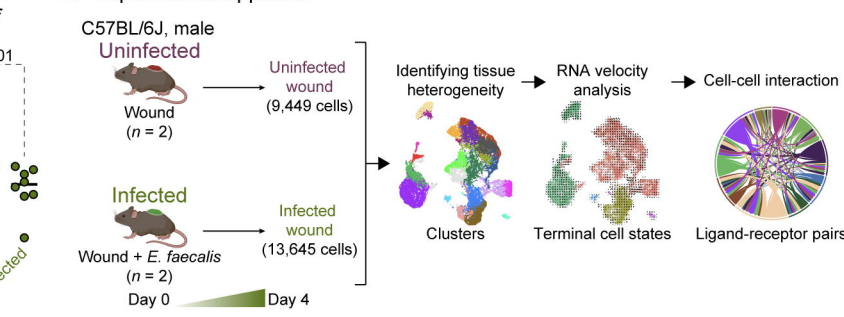

### C Main cell classes visualized on UMAP

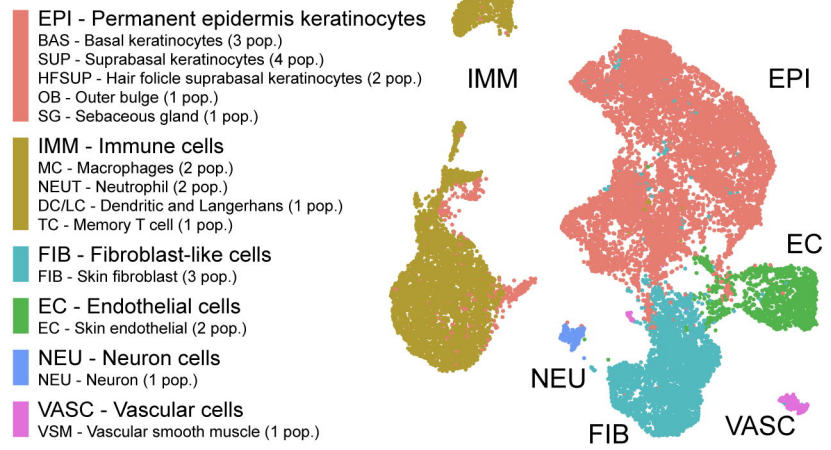

### D Uninfected/Infected visualized on UMAP

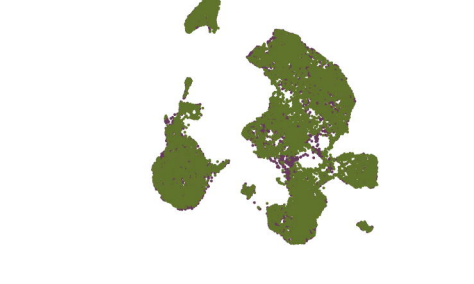

### F Top 2 cell type-specific markers in the cell classes

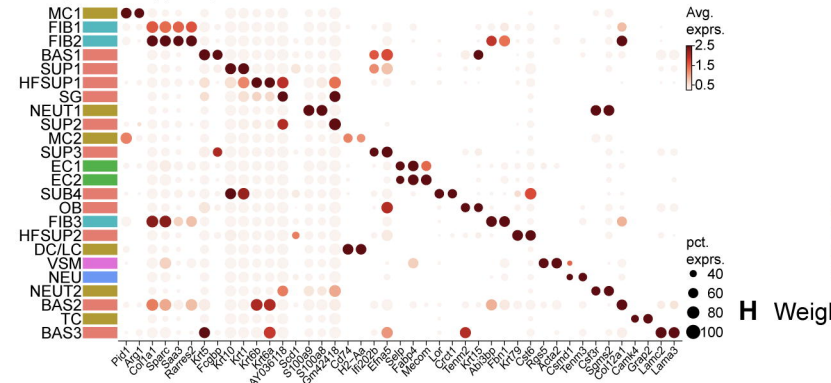

### E

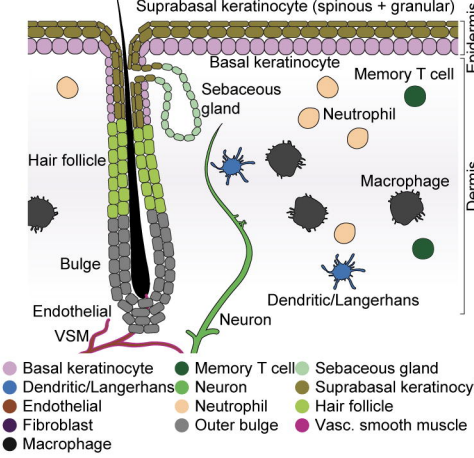

### G Gene expression correlated with cell classes

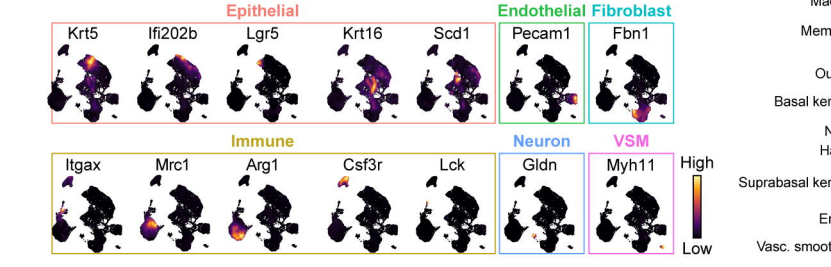

### H Weighted gene co-expression network analysis

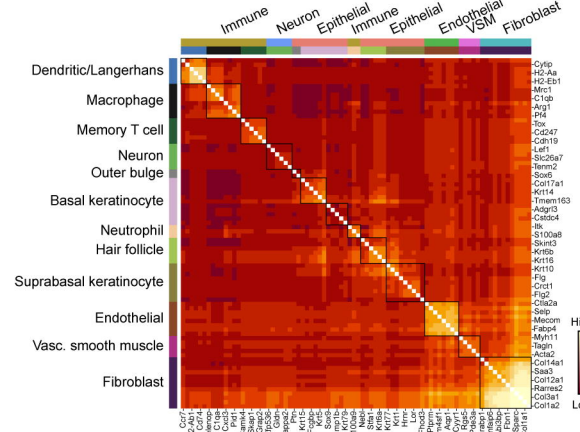



**A** Keratinocyte clusters visualized on UMAP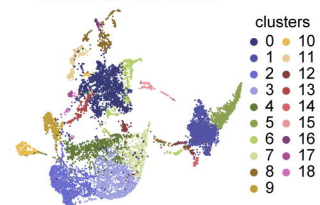**B** Uninfected/Infected visualized on UMAP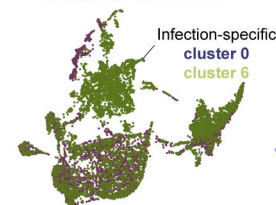**C** Gene abundance visualized on UMAP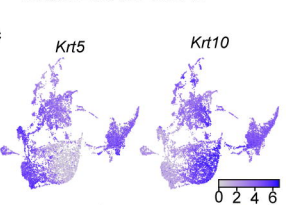**D** Gene expression in clusters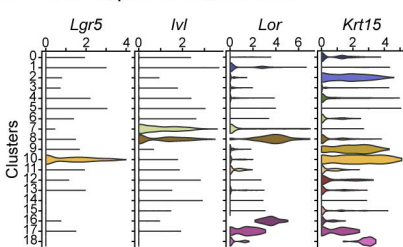**E** Top 5 expressed genes for each cluster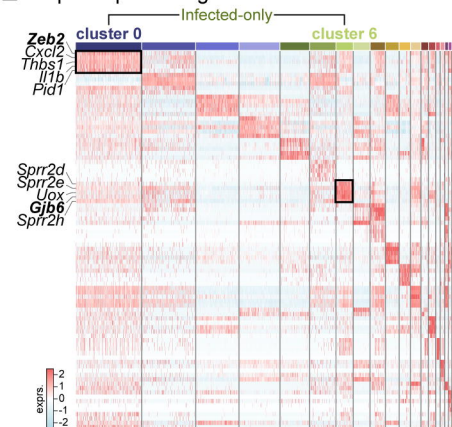**F** Gene Ontology terms for infection-specific in cluster 0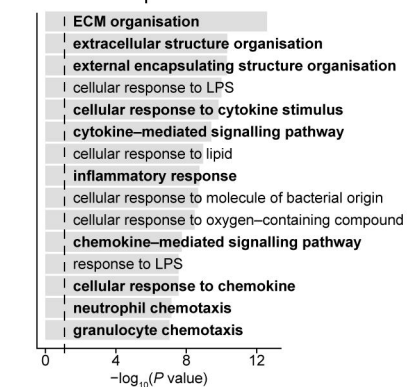**G** Gene Ontology terms for infection-specific in cluster 6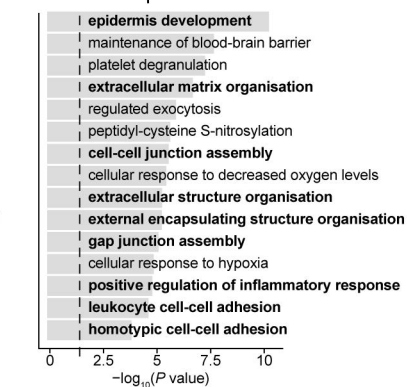**H** RNA velocity analysis of uninfected keratinocytes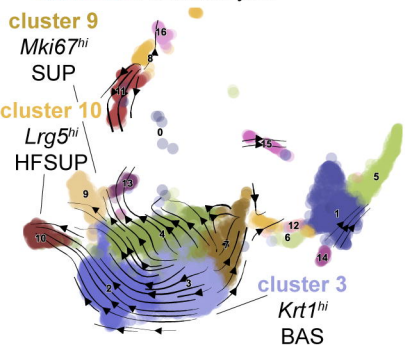**I** RNA velocity analysis of infected keratinocytes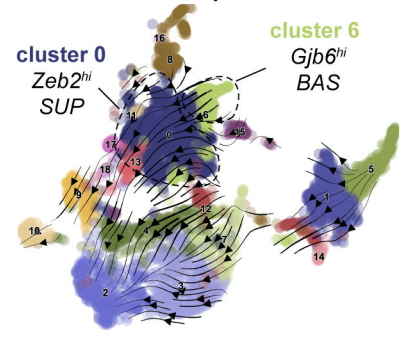**J** Top lineage driver gene in infected keratinocytes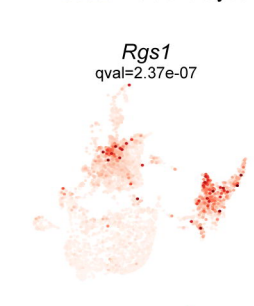**L** Inferred ligand-receptor pairs outgoing from infected keratinocytes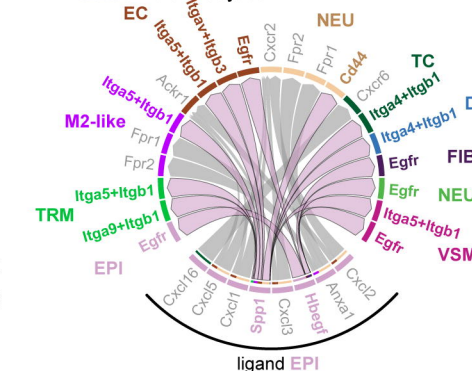**K** Gene expression dynamics resolved along latent time infected keratinocytes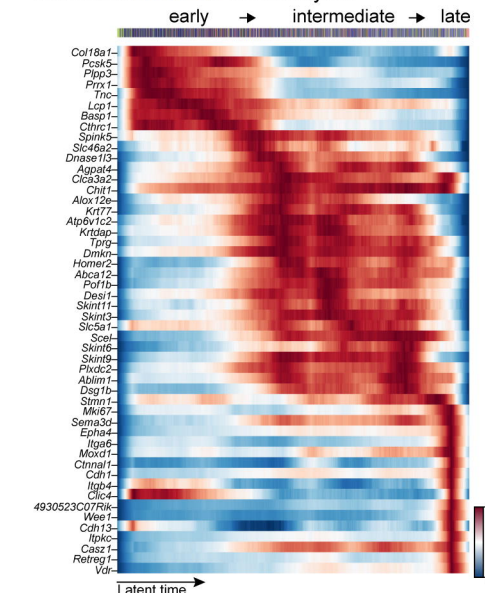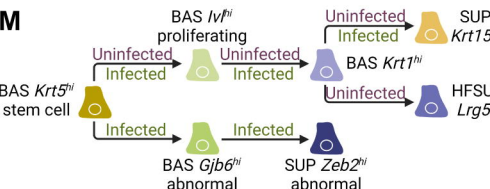

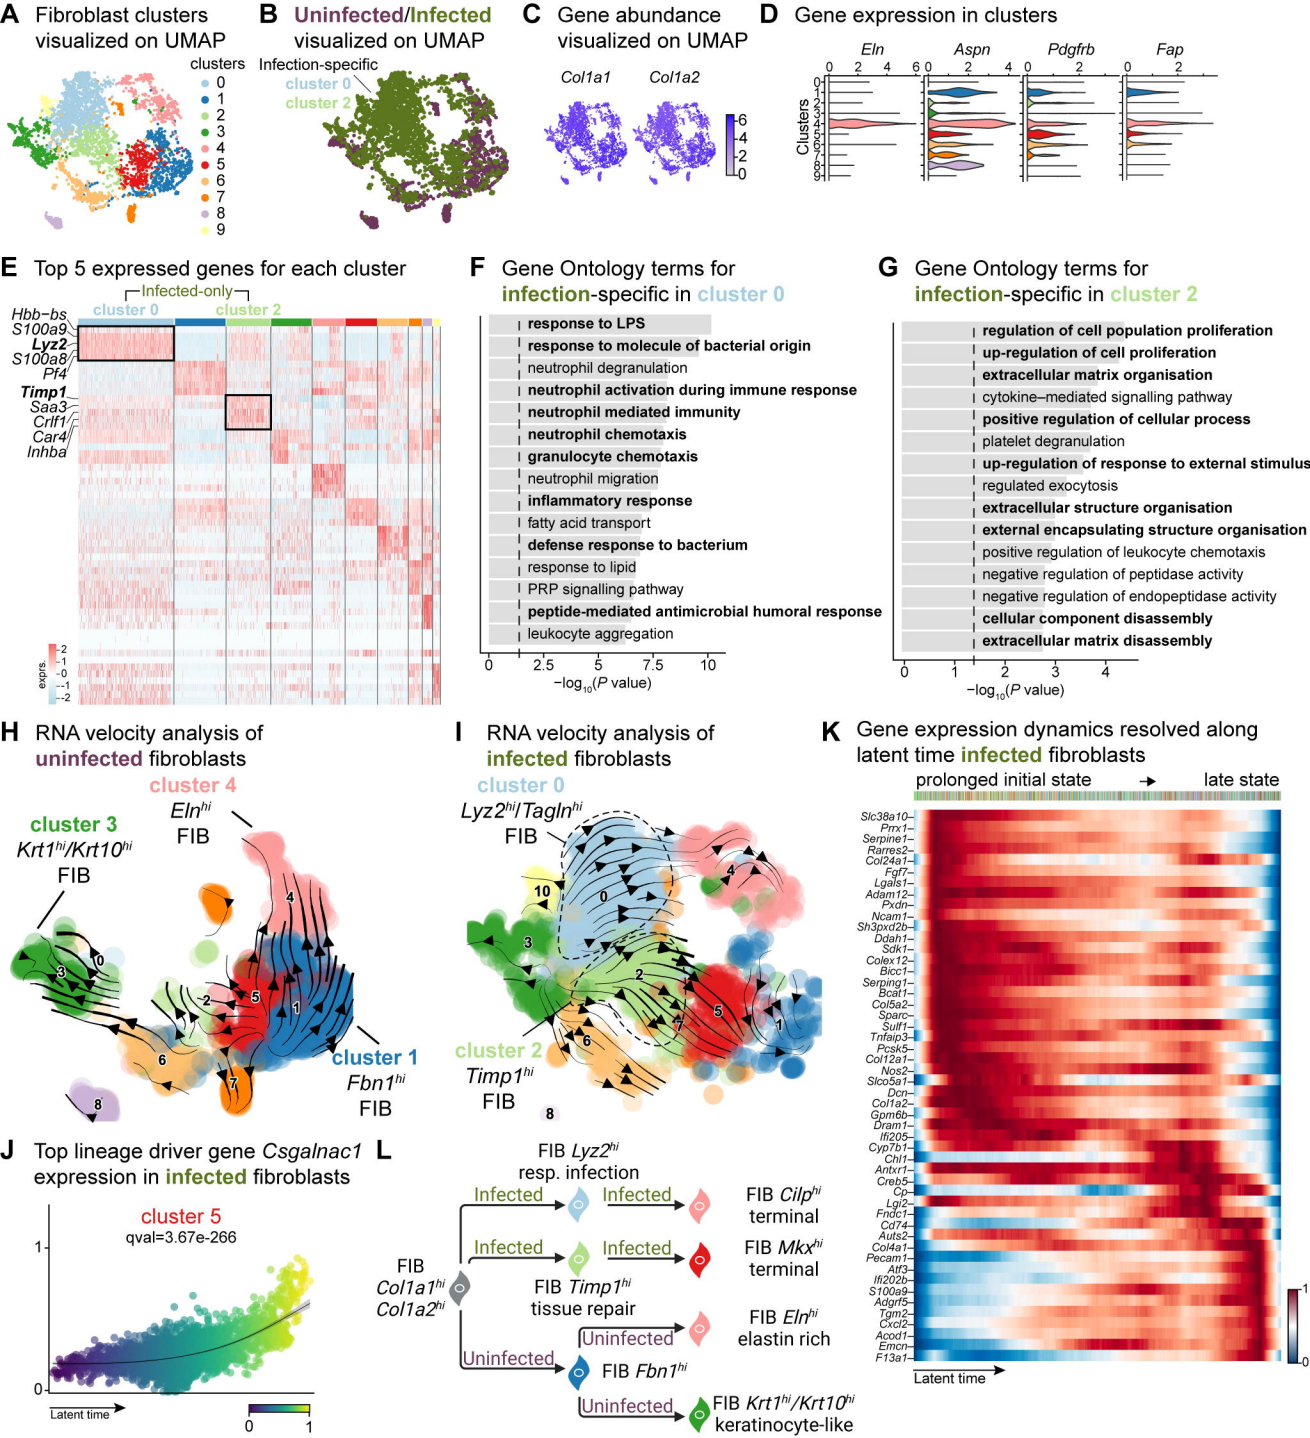



**A** Myeloid clusters visualized on UMAP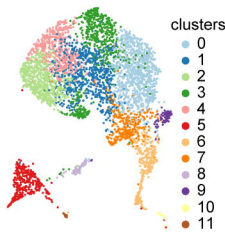**B** Uninfected/Infected visualized on UMAP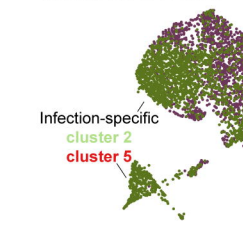**C** Gene abundance visualized on UMAP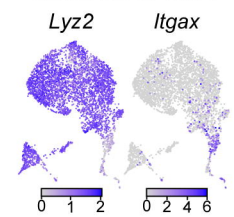**D** Gene expression in mouse wounds at 4 dpi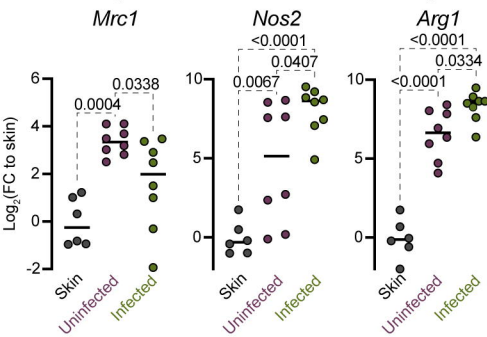**E**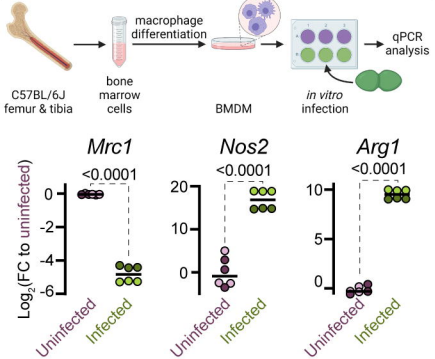**F** Spatial distribution of TRM and M2-like macrophage markers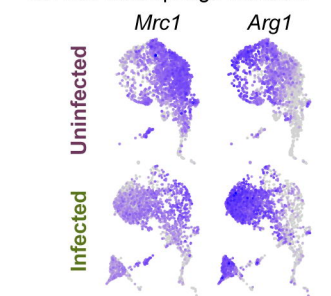**G** Gene expression in clusters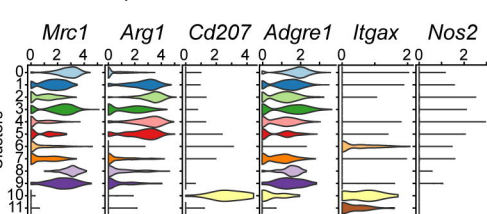**H** RNA velocity analysis of uninfected myeloid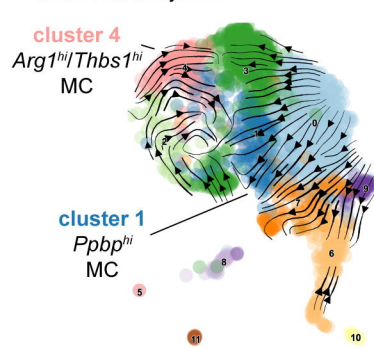**I** RNA velocity analysis of infected myeloid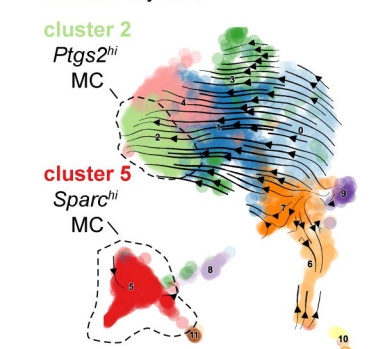**J** Top lineage driver gene in terminal macrophage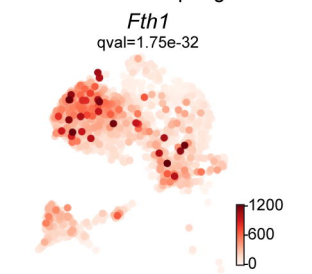**L**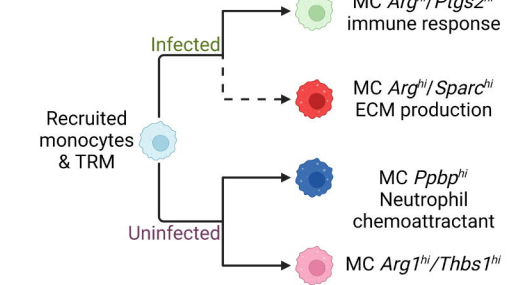**K** Gene expression dynamics resolved along latent time infected macrophages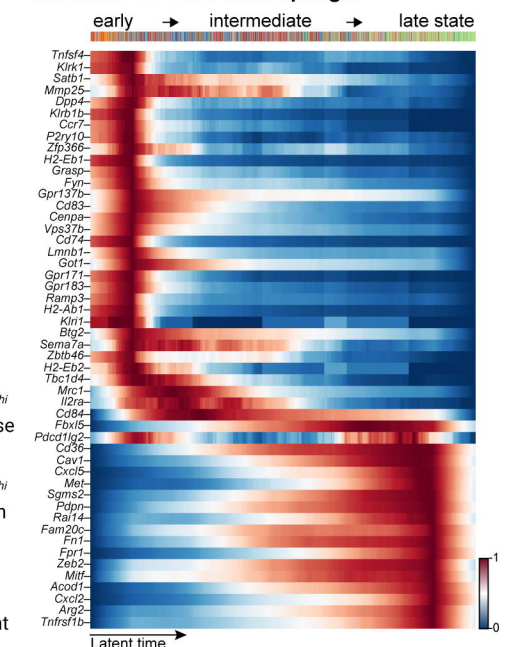

**A** Neutrophil clusters visualized on UMAP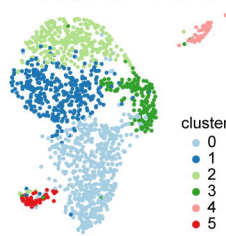**B** Uninfected/infected neutrophils visualized on UMAP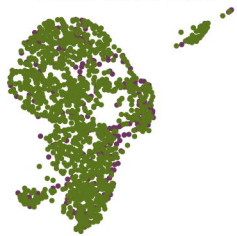**C** Gene abundance visualized on UMAP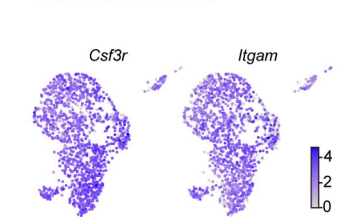**D** Gene expression in clusters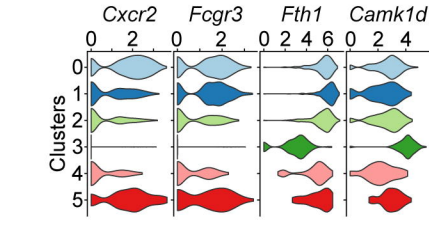**E** Top 5 expressed genes for each cluster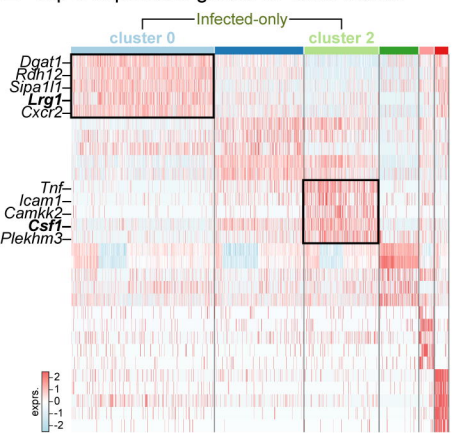**F** Gene Ontology terms for infection-specific in cluster 0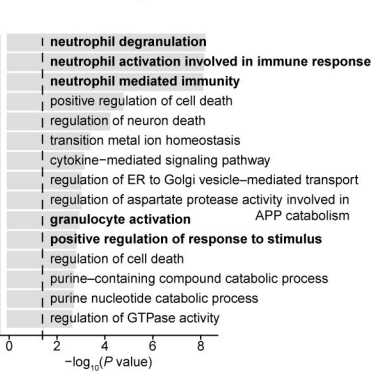**G** Gene Ontology terms for infection-specific in cluster 2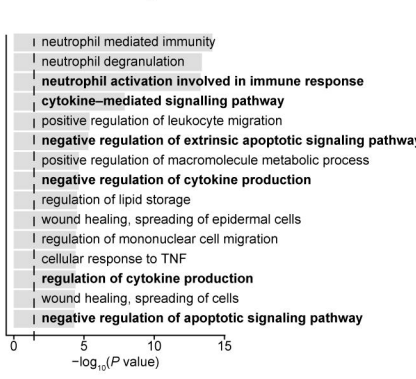**H** RNA velocity analysis of infected neutrophil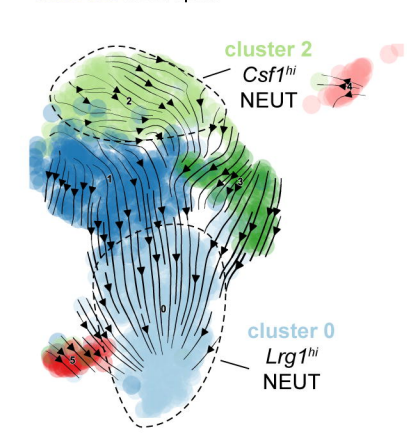**I** Top lineage driver gene in neutrophil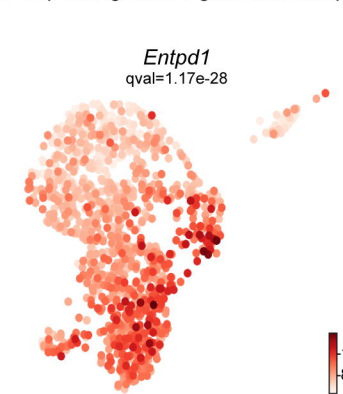**J** Putative driver genes of infected neutrophil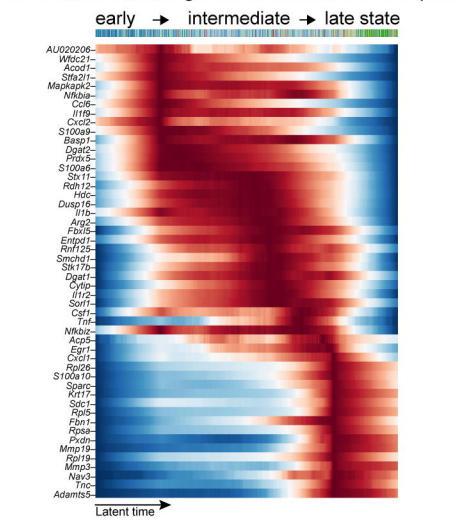**K** CCL signaling pathway interaction map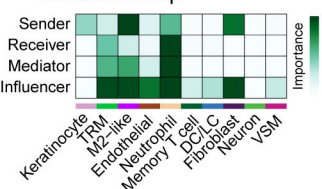**L** Gene expressions of cytokines uninfected/infected in neutrophils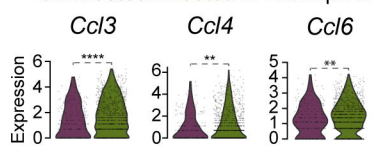**M** Ccl3-Ccr1 ligand-receptor pairing mediate neutrophil-macrophage crosstalk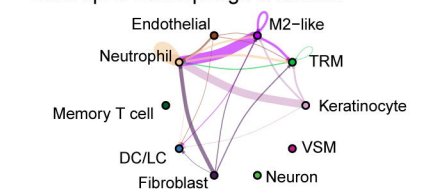



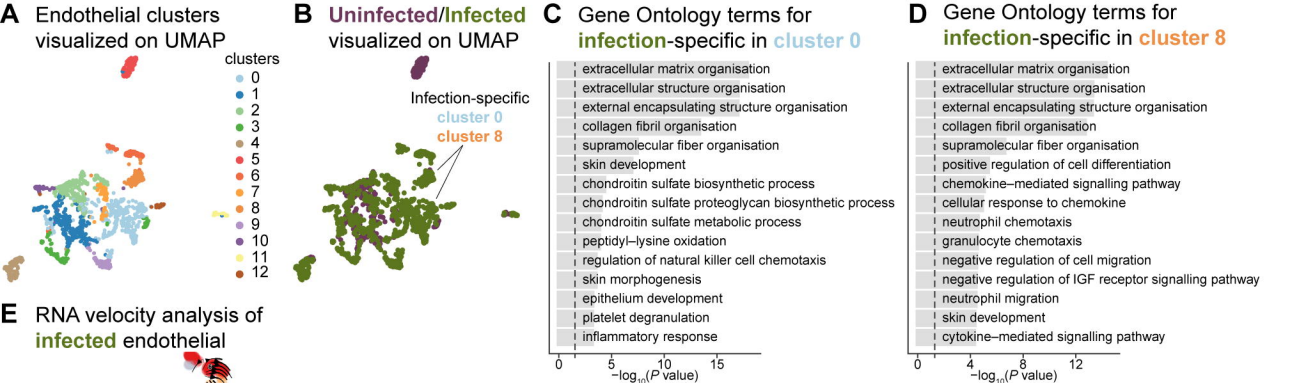

**E** RNA velocity analysis of infected endothelial

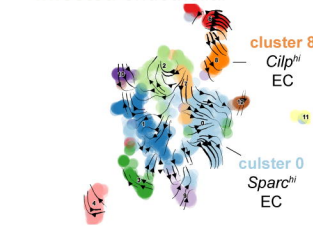

**F** Top lineage driver genes in infected endothelial

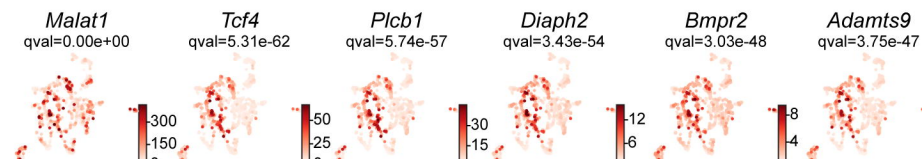

**G** NicheNet interaction between infected EPI, FIB, MC and EC

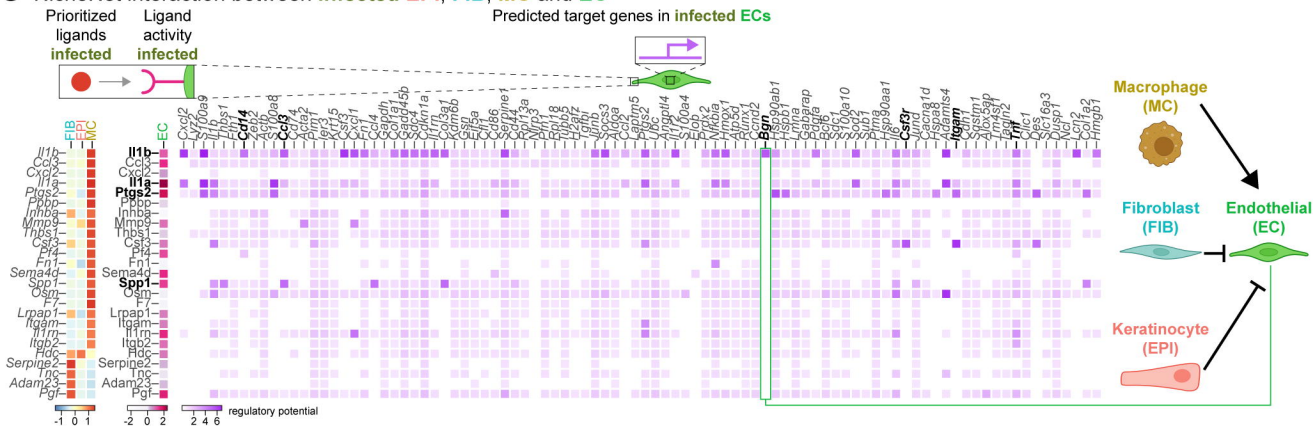

**H** Interactions between infected cells

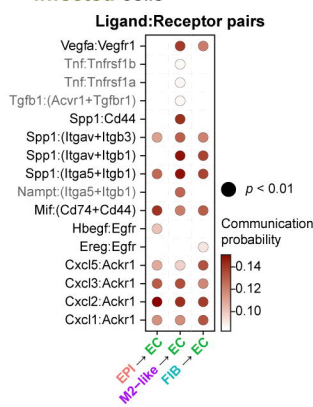

**I** Differential interaction strengths in infected cells

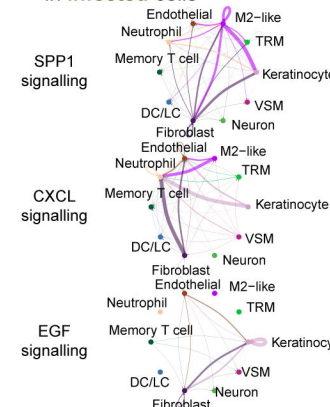

**J** Gene expressions of uninfected/infected EPI, MC, and FIB

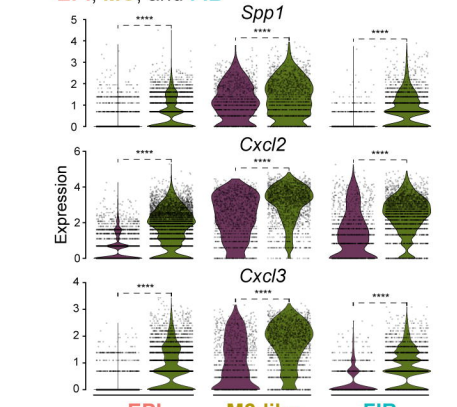

Source: https://www.biorxiv.org/content/10.1101/2023.11.16.566967v3.full.pdf
